# Supplementary material for: Ring splitting of azetidin-2-ones via radical anions
Source: Royal Society of Chemistry journal article supplement (doi:10.1039/c2ob26528a), 2012-01-01
Supplement: c2ob26528a.pdf [file c2ob26528a.pdf]

## Supporting Information

### Ring Splitting of Azetidin-2-ones *via* Radical Anions

Raúl Pérez-Ruiz,<sup>†</sup> Jose A. Sáez,<sup>†</sup> Luis R. Domingo,<sup>‡</sup> M. Consuelo Jiménez,<sup>\*†</sup> and

Miguel A. Miranda <sup>\*†</sup>

<sup>†</sup> Departamento de Química/Instituto de Tecnología Química UPV-CSIC Universidad Politécnica de Valencia, Camino de Vera s/n, 46022, Valencia, Spain, and <sup>‡</sup> Departamento de Química Orgánica, Universidad de Valencia, Dr. Moliner 50, E-46100, Burjassot, Valencia, Spain.

[mcjimene@qim.upv.es](mailto:mcjimene@qim.upv.es), [mmiranda@qim.upv.es](mailto:mmiranda@qim.upv.es)

- S1:** <sup>1</sup>H-NMR spectrum of *trans*-3-cyclopropyl-*N*,4-diphenylazetidin-2-one (*t-1b*).
- S2:** <sup>13</sup>C-NMR spectrum of *trans*-3-cyclopropyl-*N*,4-diphenylazetidin-2-one (*t-1b*).
- S3:** DEPT spectrum of *trans*-3-cyclopropyl-*N*,4-diphenylazetidin-2-one (*t-1b*).
- S4:** <sup>1</sup>H-NMR spectrum of *cis*-3-cyclopropyl-*N*,4-diphenylazetidin-2-one (*c-1b*).
- S5:** <sup>13</sup>C-NMR spectrum of *cis*-3-cyclopropyl-*N*,4-diphenylazetidin-2-one (*c-1b*).
- S6:** DEPT spectrum of *cis*-3-cyclopropyl-*N*,4-diphenylazetidin-2-one (*c-1b*).
- S7:** <sup>1</sup>H-NMR spectrum of *trans*-*N*,3-diphenyl-4-methylazetidin-2-one (*t-1c*).
- S8:** <sup>13</sup>C-NMR spectrum of *trans*-*N*,3-diphenyl-4-methylazetidin-2-one (*t-1c*).
- S9:** <sup>1</sup>H-NMR spectrum of *cis*-*N*,3-diphenyl-4-methylazetidin-2-one (*c-1c*).
- S10:** <sup>13</sup>C-NMR spectrum of *cis*-*N*,3-diphenyl-4-methylazetidin-2-one (*c-1c*).
- S11:** <sup>1</sup>H-NMR spectrum of 2-cyclopropyl-*N*,3-diphenylpropanamide (**2b**).
- S12:** <sup>13</sup>C-NMR spectrum of 2-cyclopropyl-*N*,3-diphenylpropanamide (**2b**).
- S13:** X-Ray structure of 2-cyclopropyl-*N*,3-diphenylpropanamide (**2b**).
- S14-S22:** X-Ray data of **2b** (Tables).
- S23-S78:** Geometries of the stationary points (Cartesian coordinates).

$^1\text{H-NMR}$  spectrum of *trans*-3-cyclopropyl-*N*,4-diphenylazetidin-2-one (*t*-**1b**)

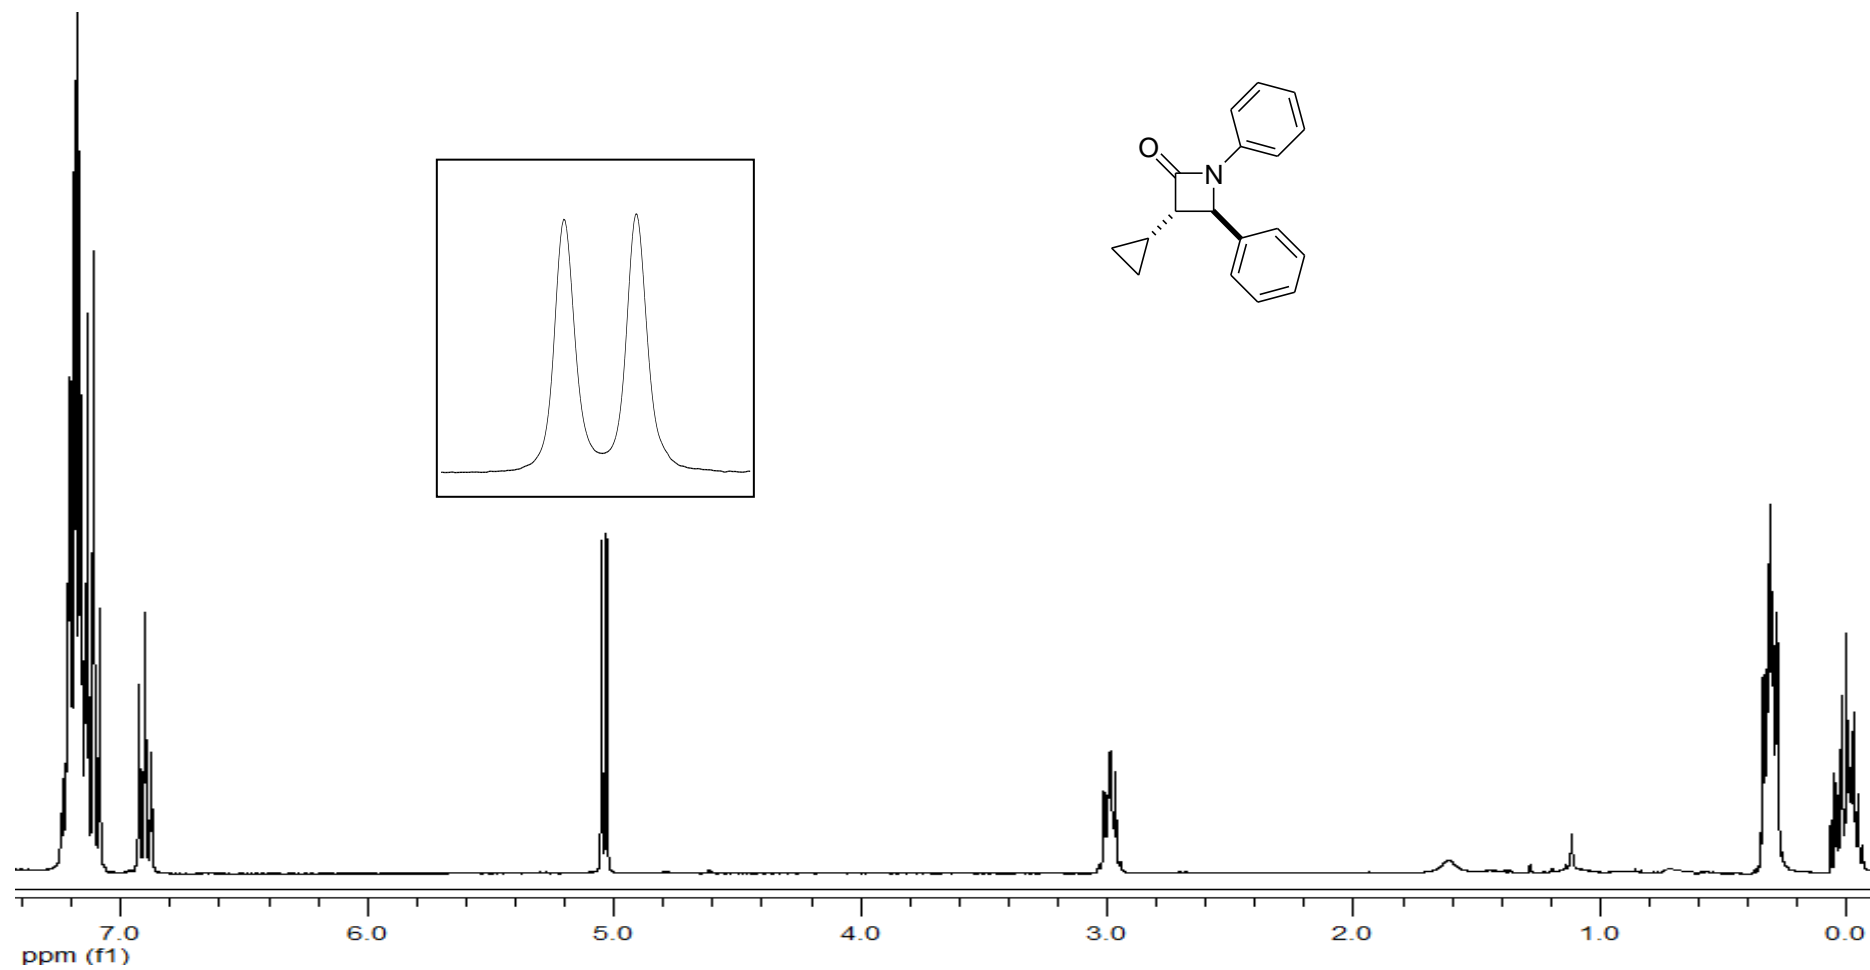

$^{13}\text{C}$ -NMR spectrum of *trans*-3-cyclopropyl-*N*,4-diphenylazetidin-2-one (*t*-**1b**)

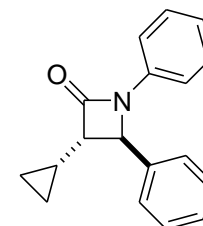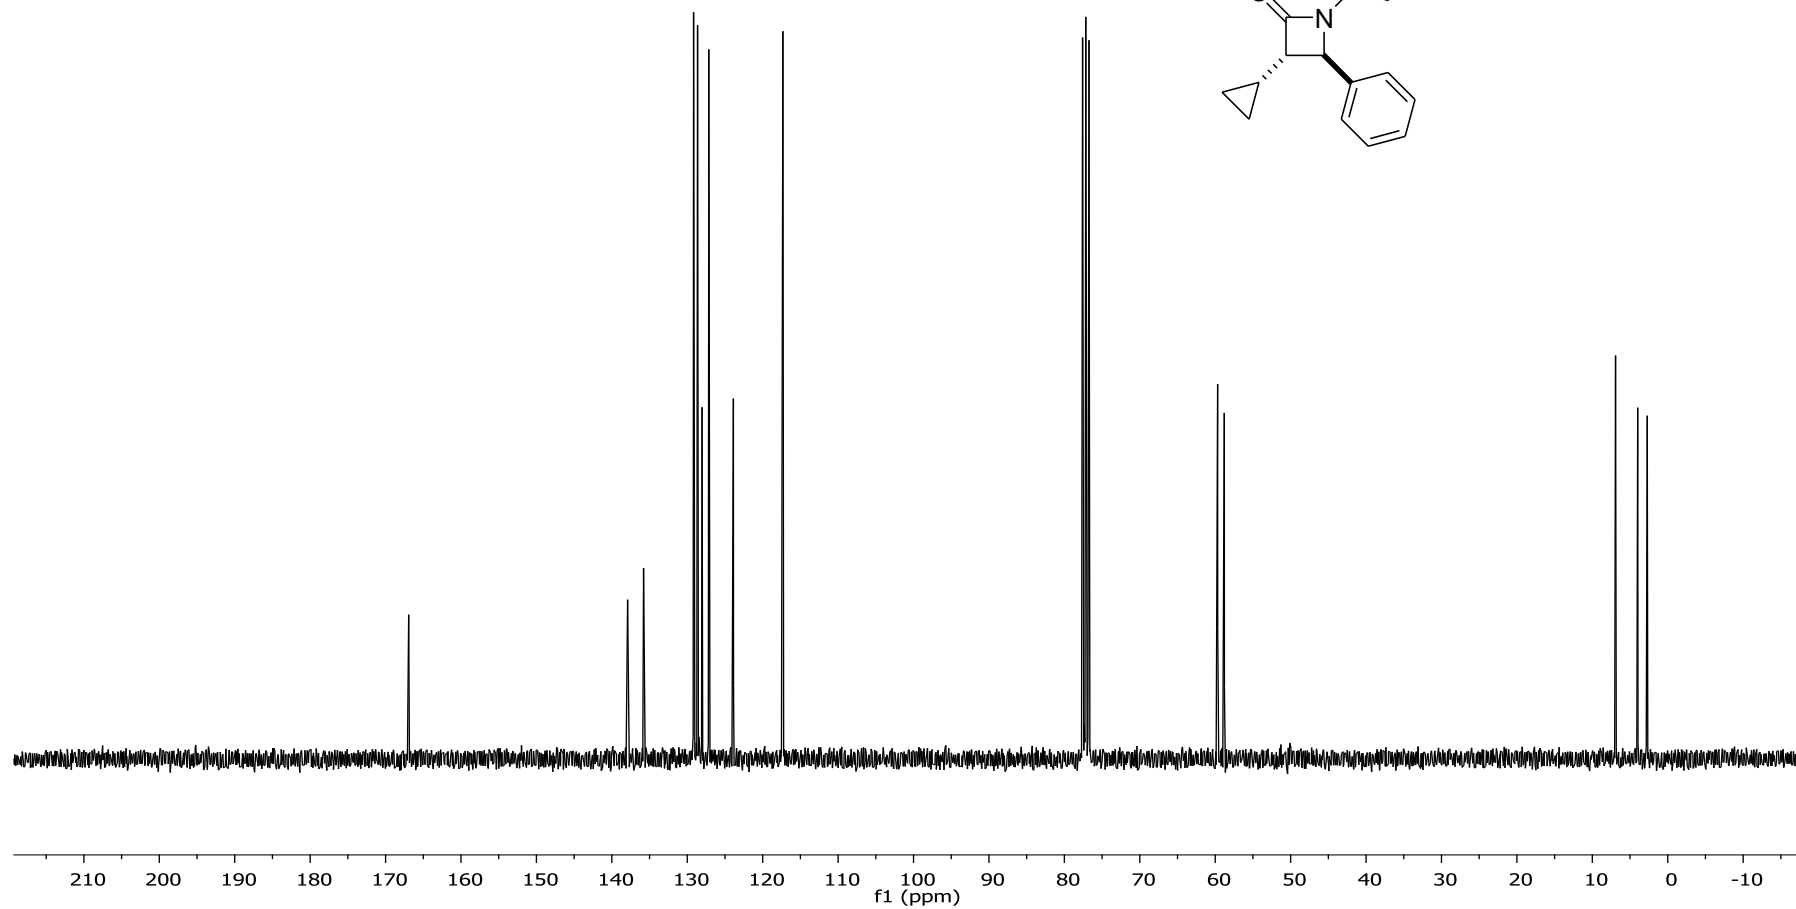

DEPT spectrum of *trans*-3-cyclopropyl-*N*,4-diphenylazetidin-2-one (*t*-**1b**)

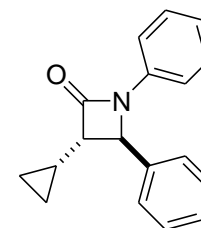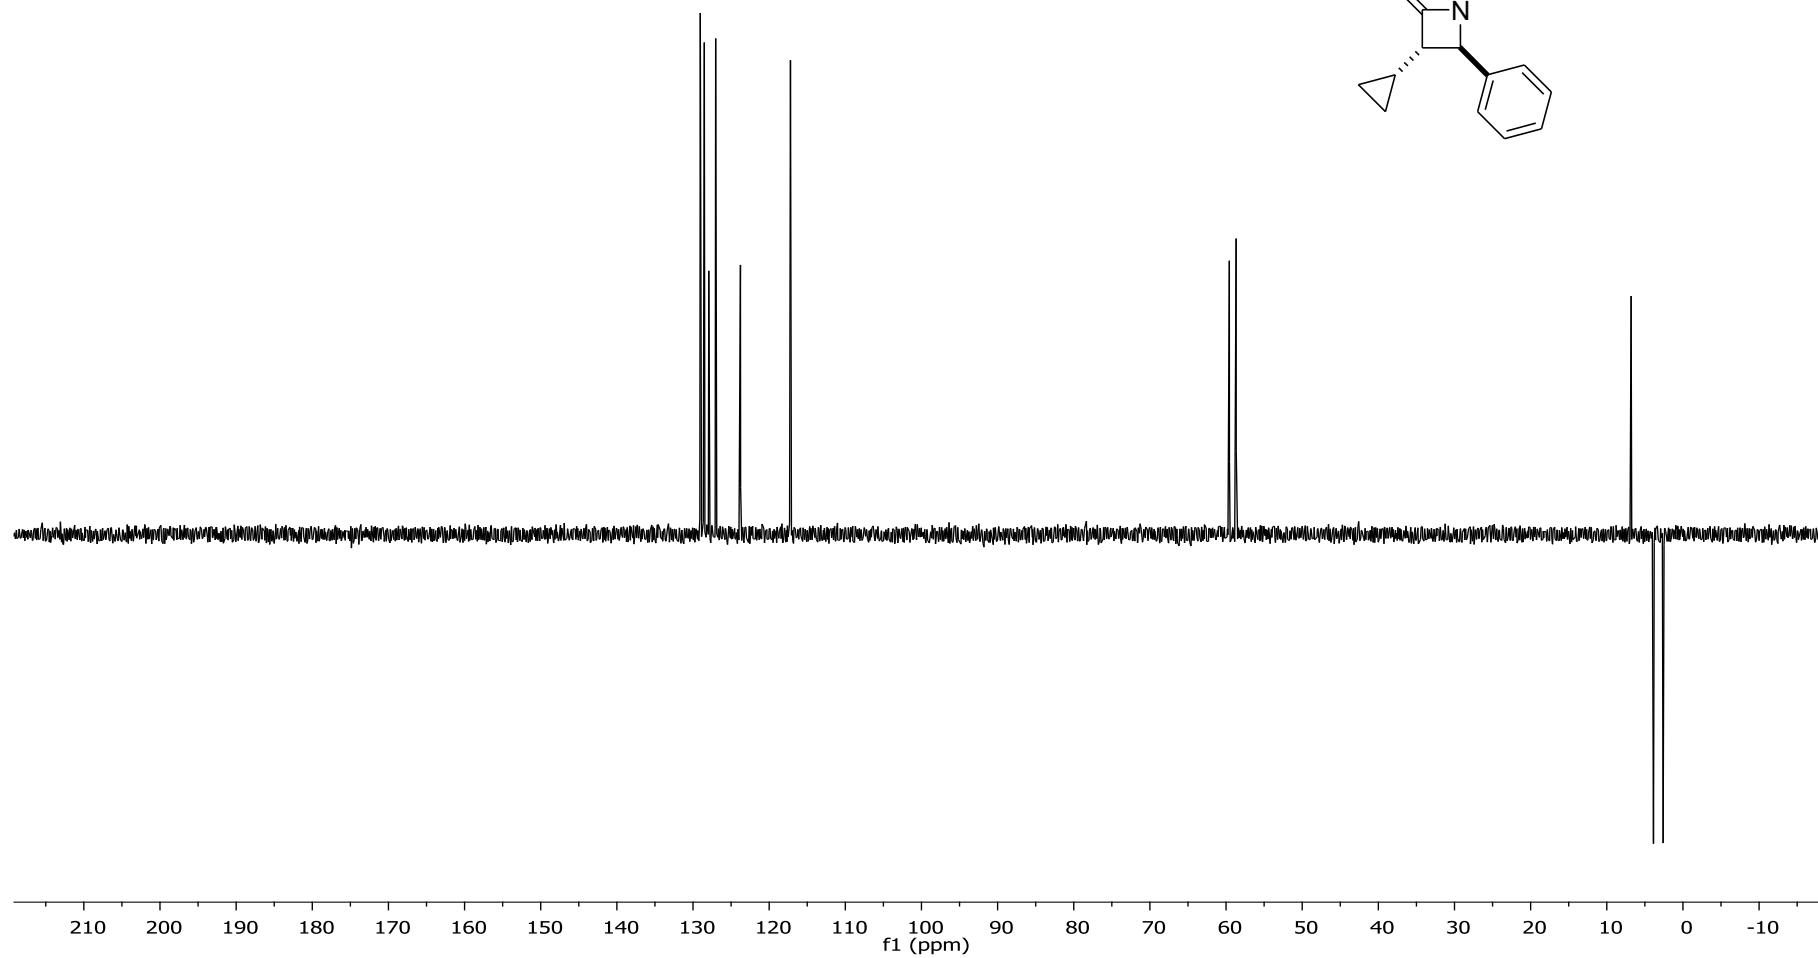

$^1\text{H-NMR}$  spectrum of *cis*-3-cyclopropyl-*N*,4-diphenylazetidin-2-one (*c*-**1b**)

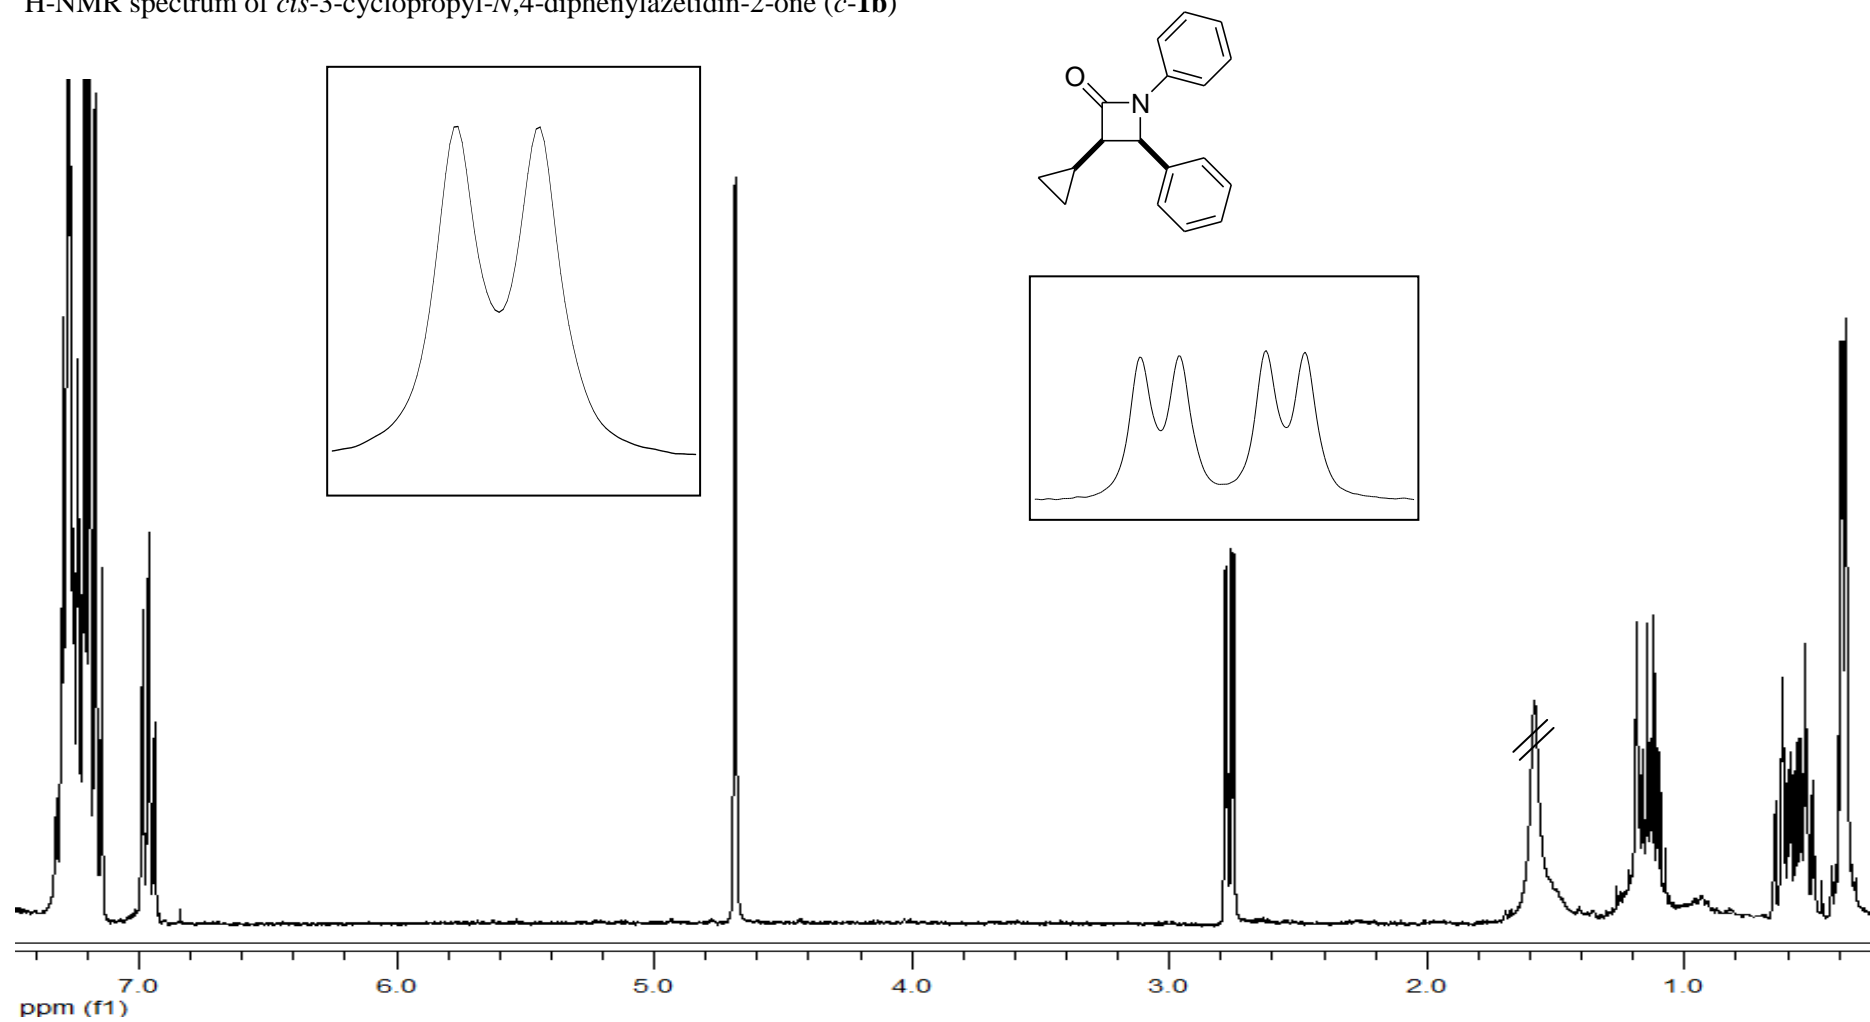

$^{13}\text{C}$ -NMR spectrum of *cis*-3-cyclopropyl-*N*,4-diphenylazetidin-2-one (*c*-**1b**)

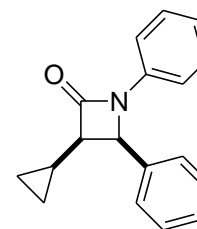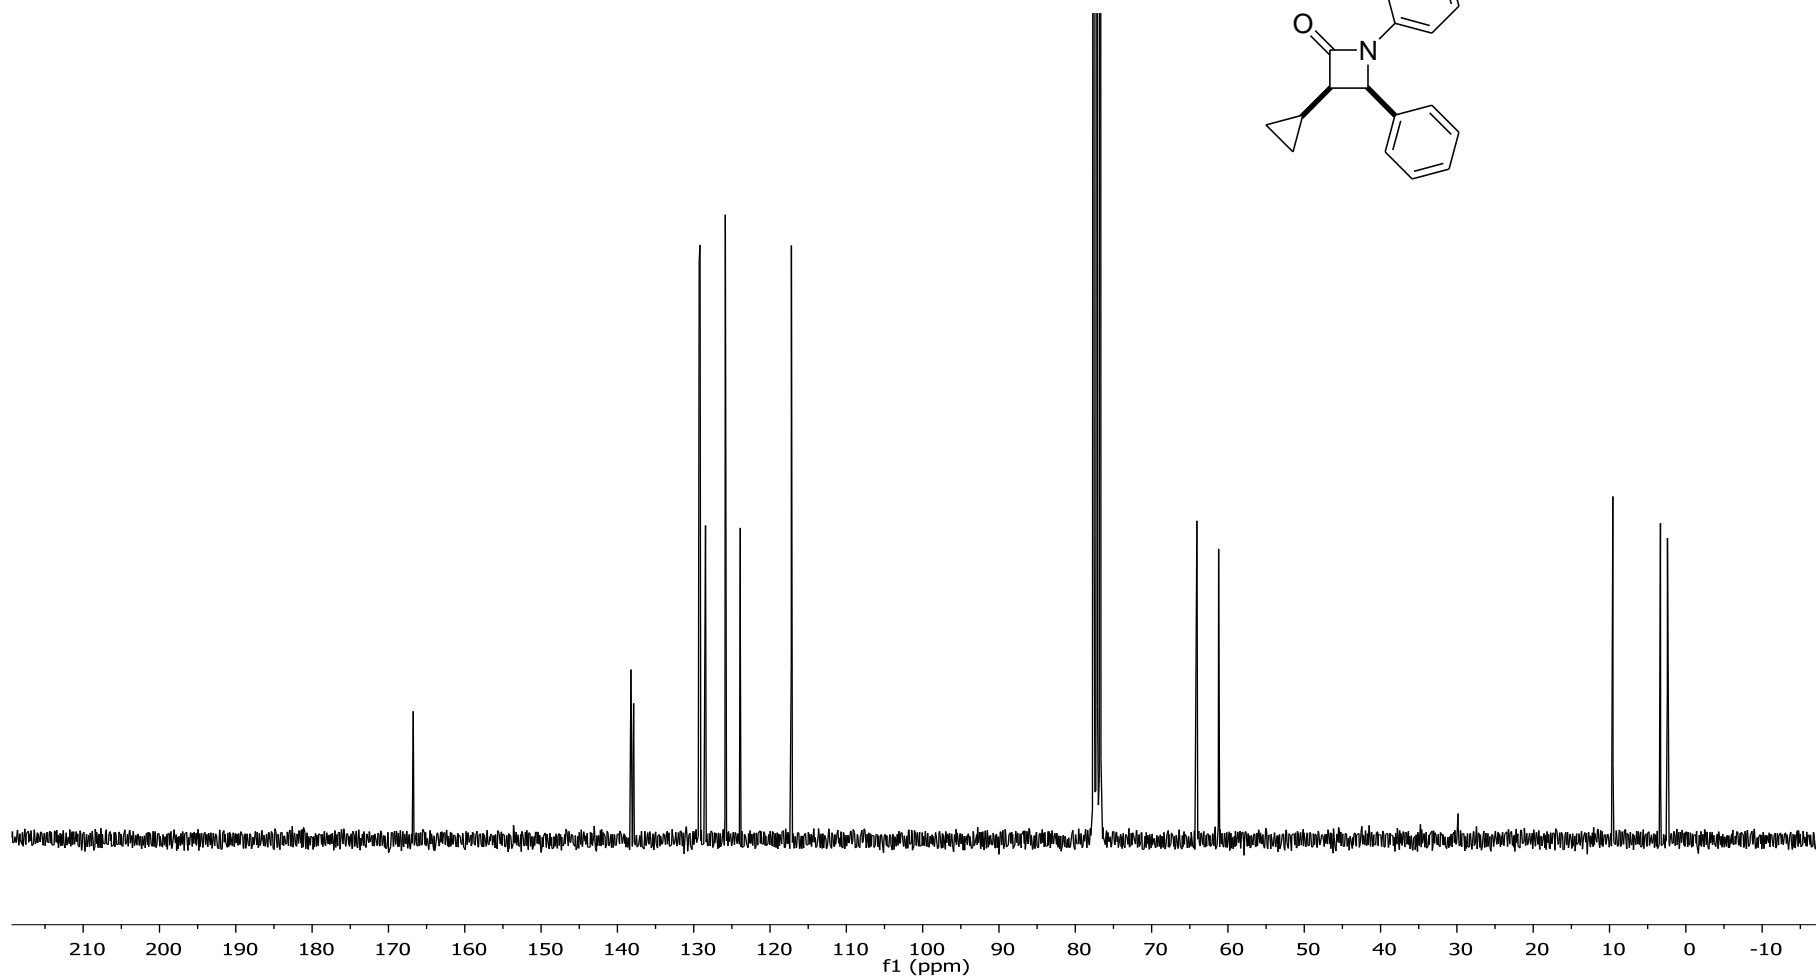

DEPT spectrum of *cis*-3-cyclopropyl-*N*,4-diphenylazetidin-2-one (**c-1b**)

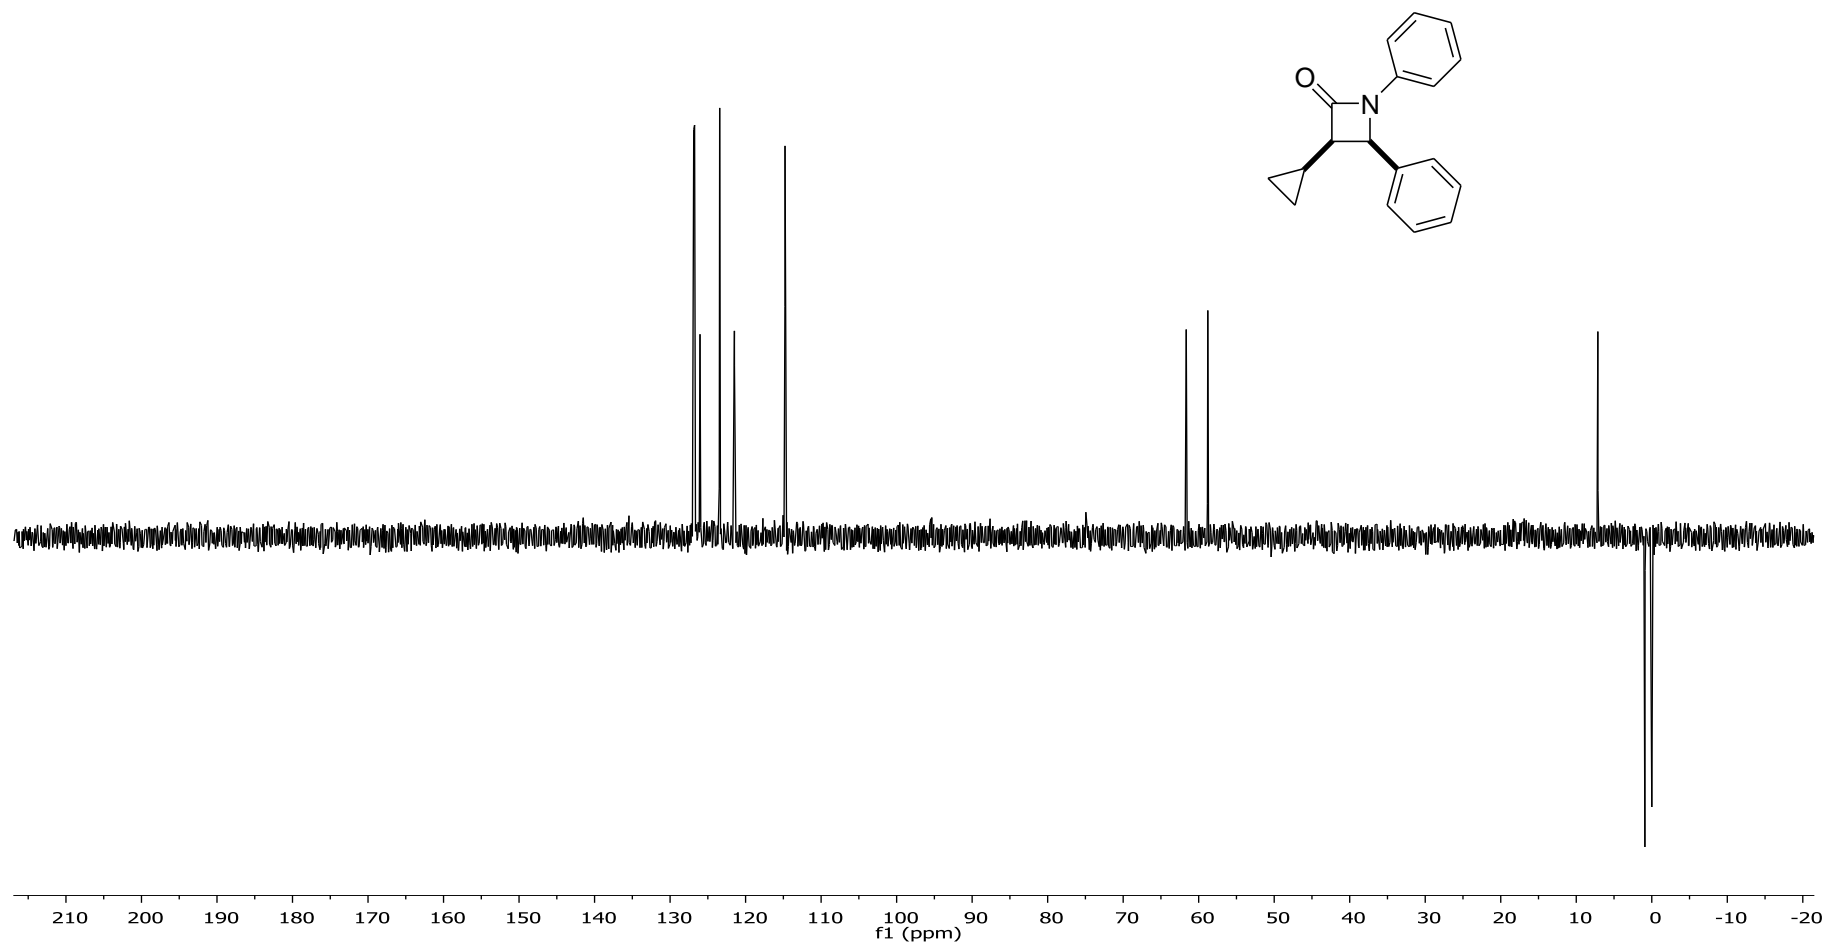

$^1\text{H-NMR}$  spectrum of *trans*-*N*,3-diphenyl-4-methylazetidin-2-one (*t*-**1c**)

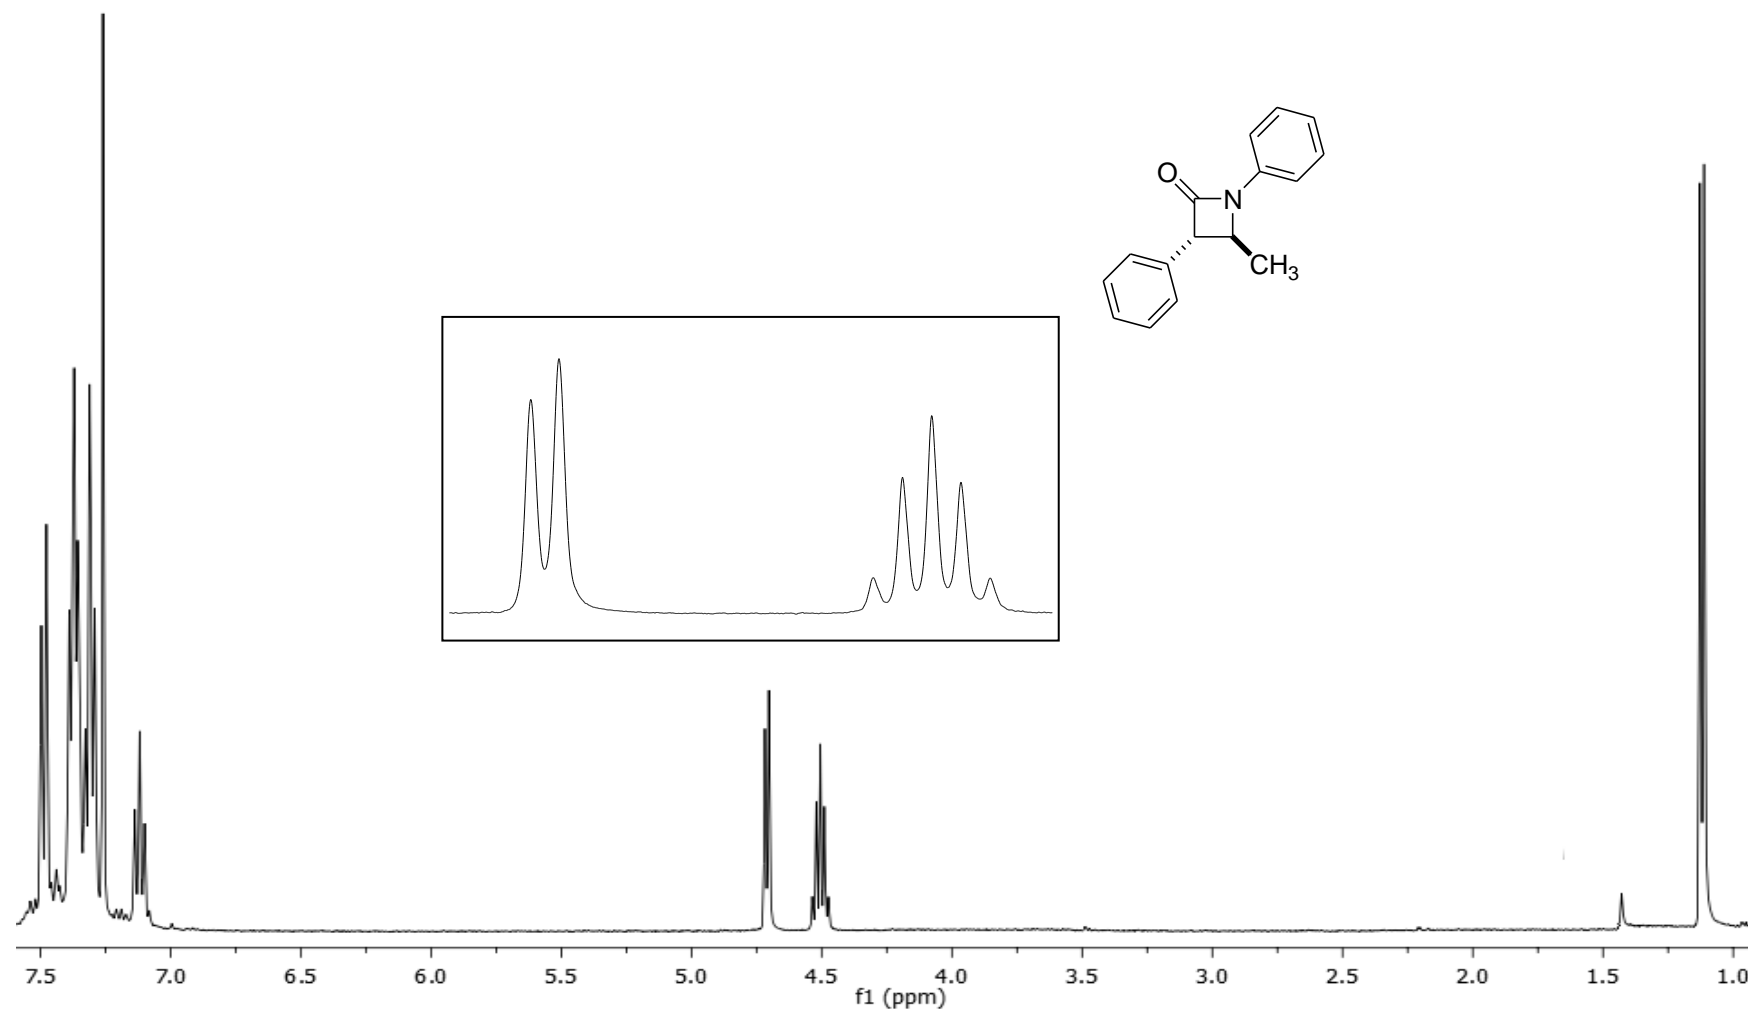



$^{13}\text{C}$ -NMR spectrum of *trans*-*N*,3-diphenyl-4-methylazetidin-2-one (*t*-**1c**)

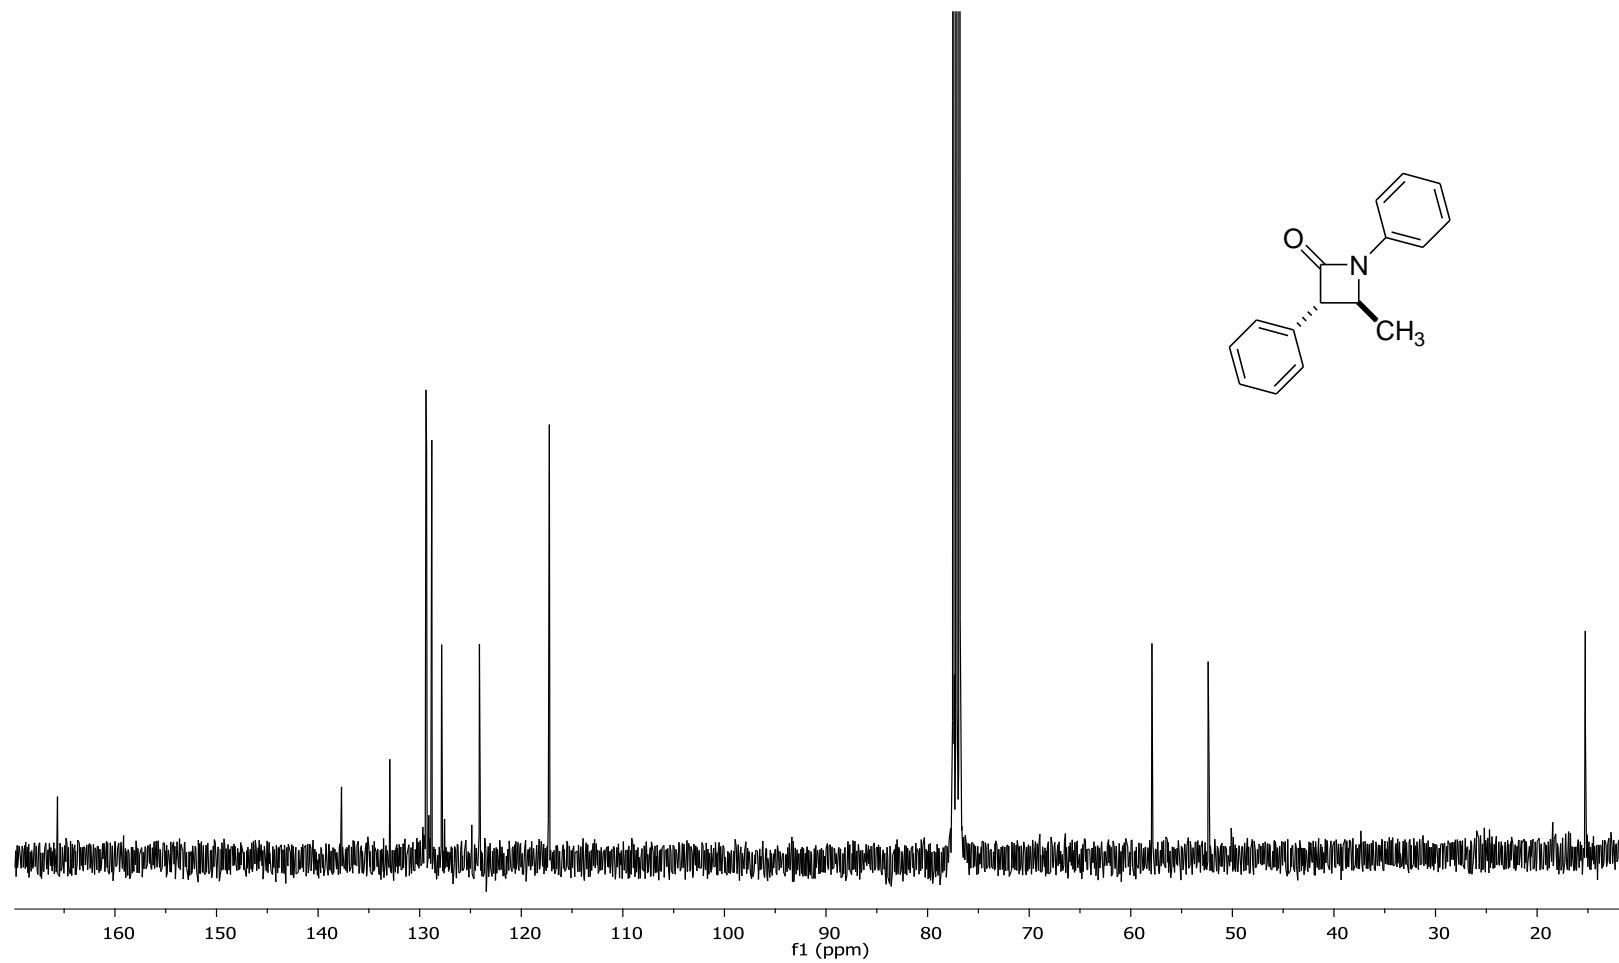

$^1\text{H-NMR}$  spectrum of *cis*-*N*,3-diphenyl-4-methylazetidin-2-one (*c*-**1c**)

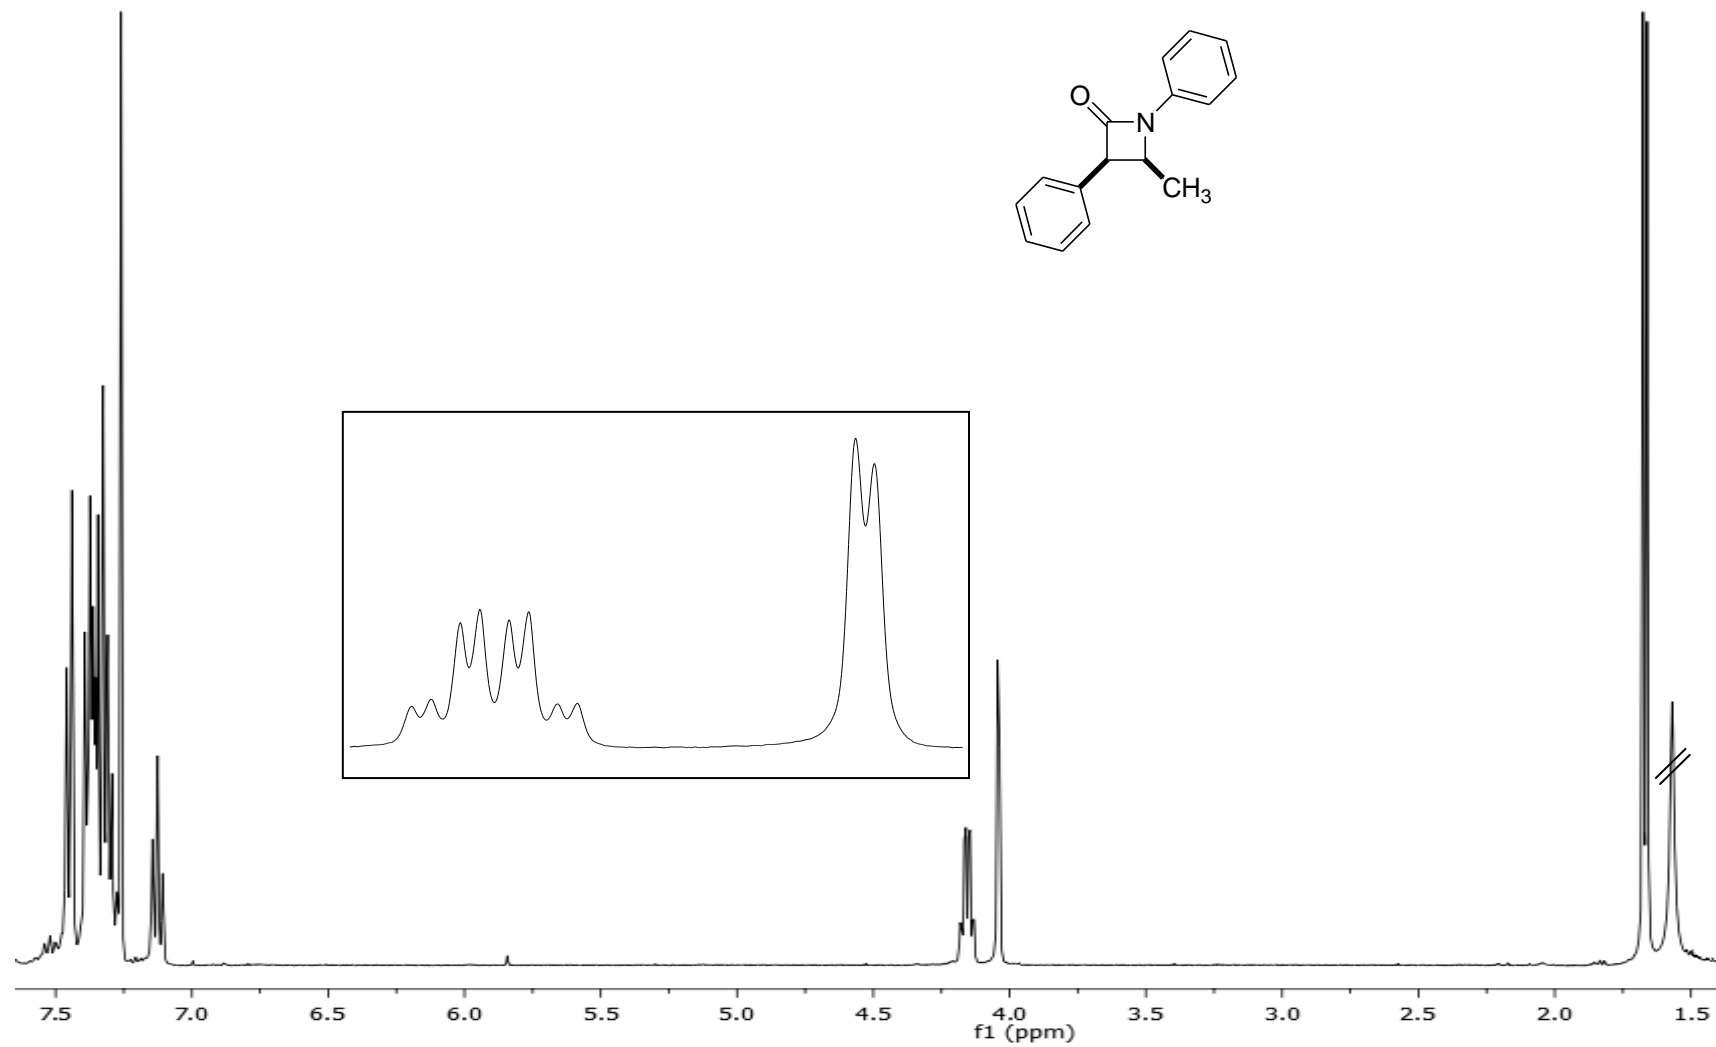

$^{13}\text{C}$ -NMR spectrum of *cis*-*N*,3-diphenyl-4-methylazetidin-2-one (**c-1c**)

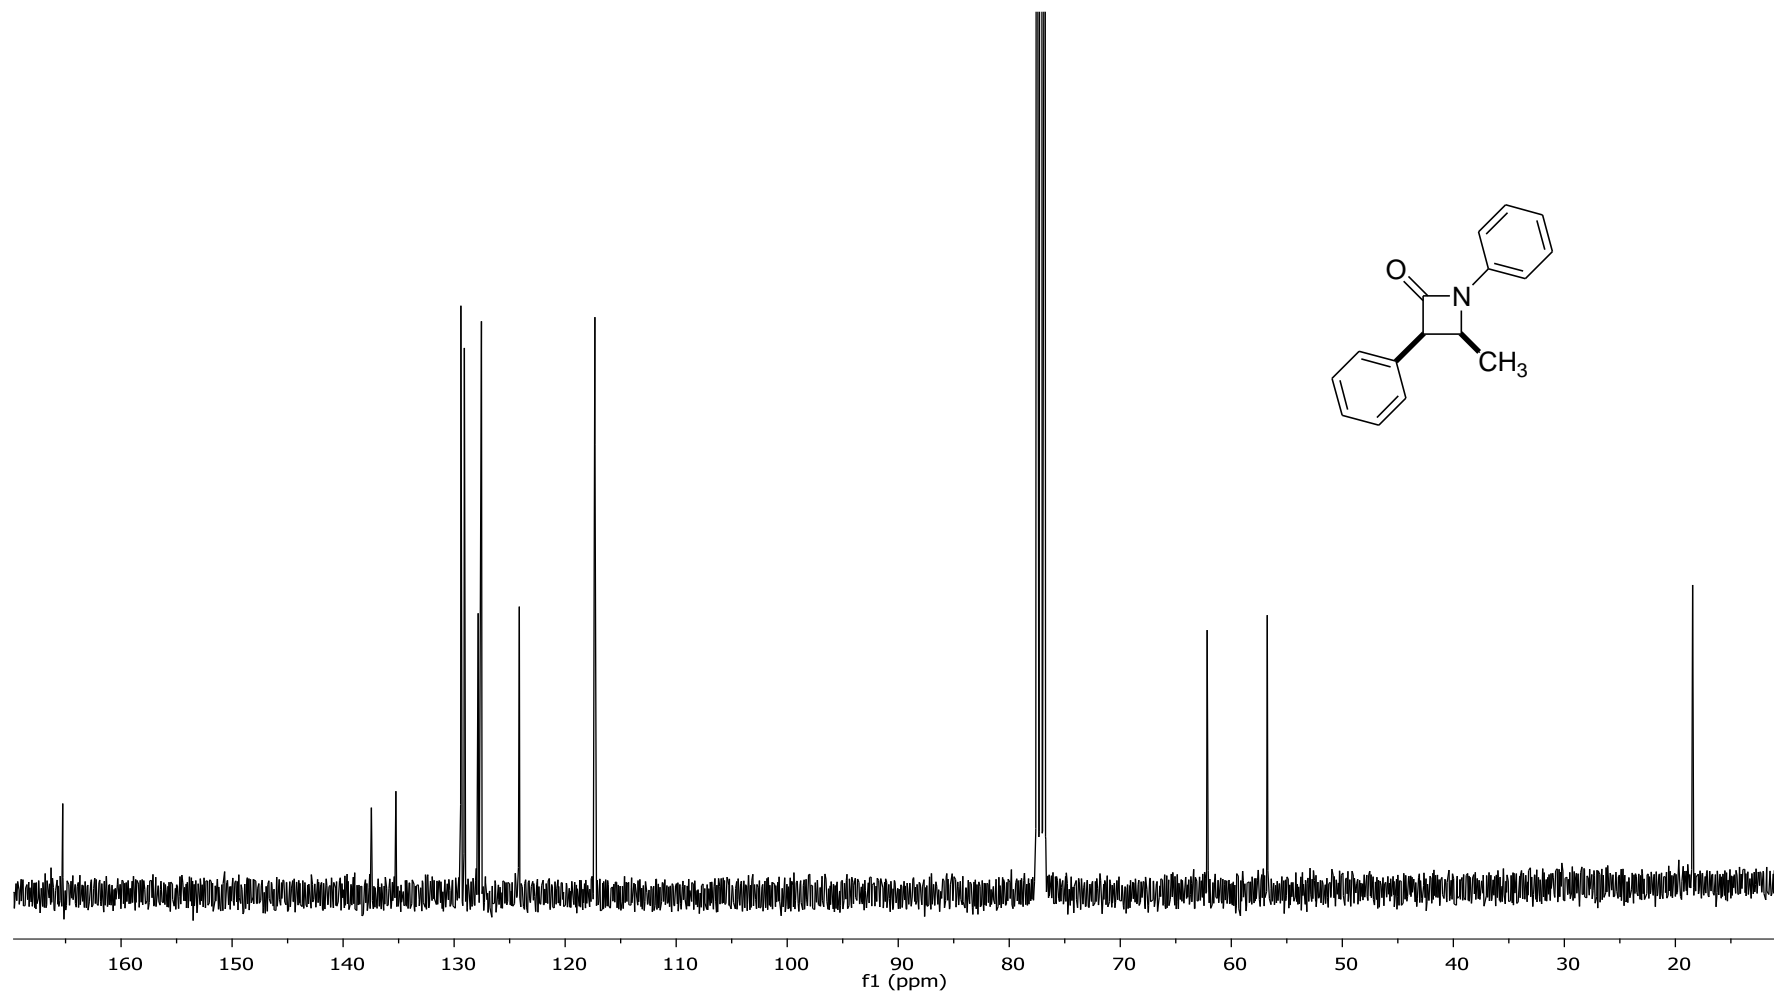

$^1\text{H-NMR}$  spectrum of 2-cyclopropyl-*N*,3-diphenylpropanamide (**2b**)

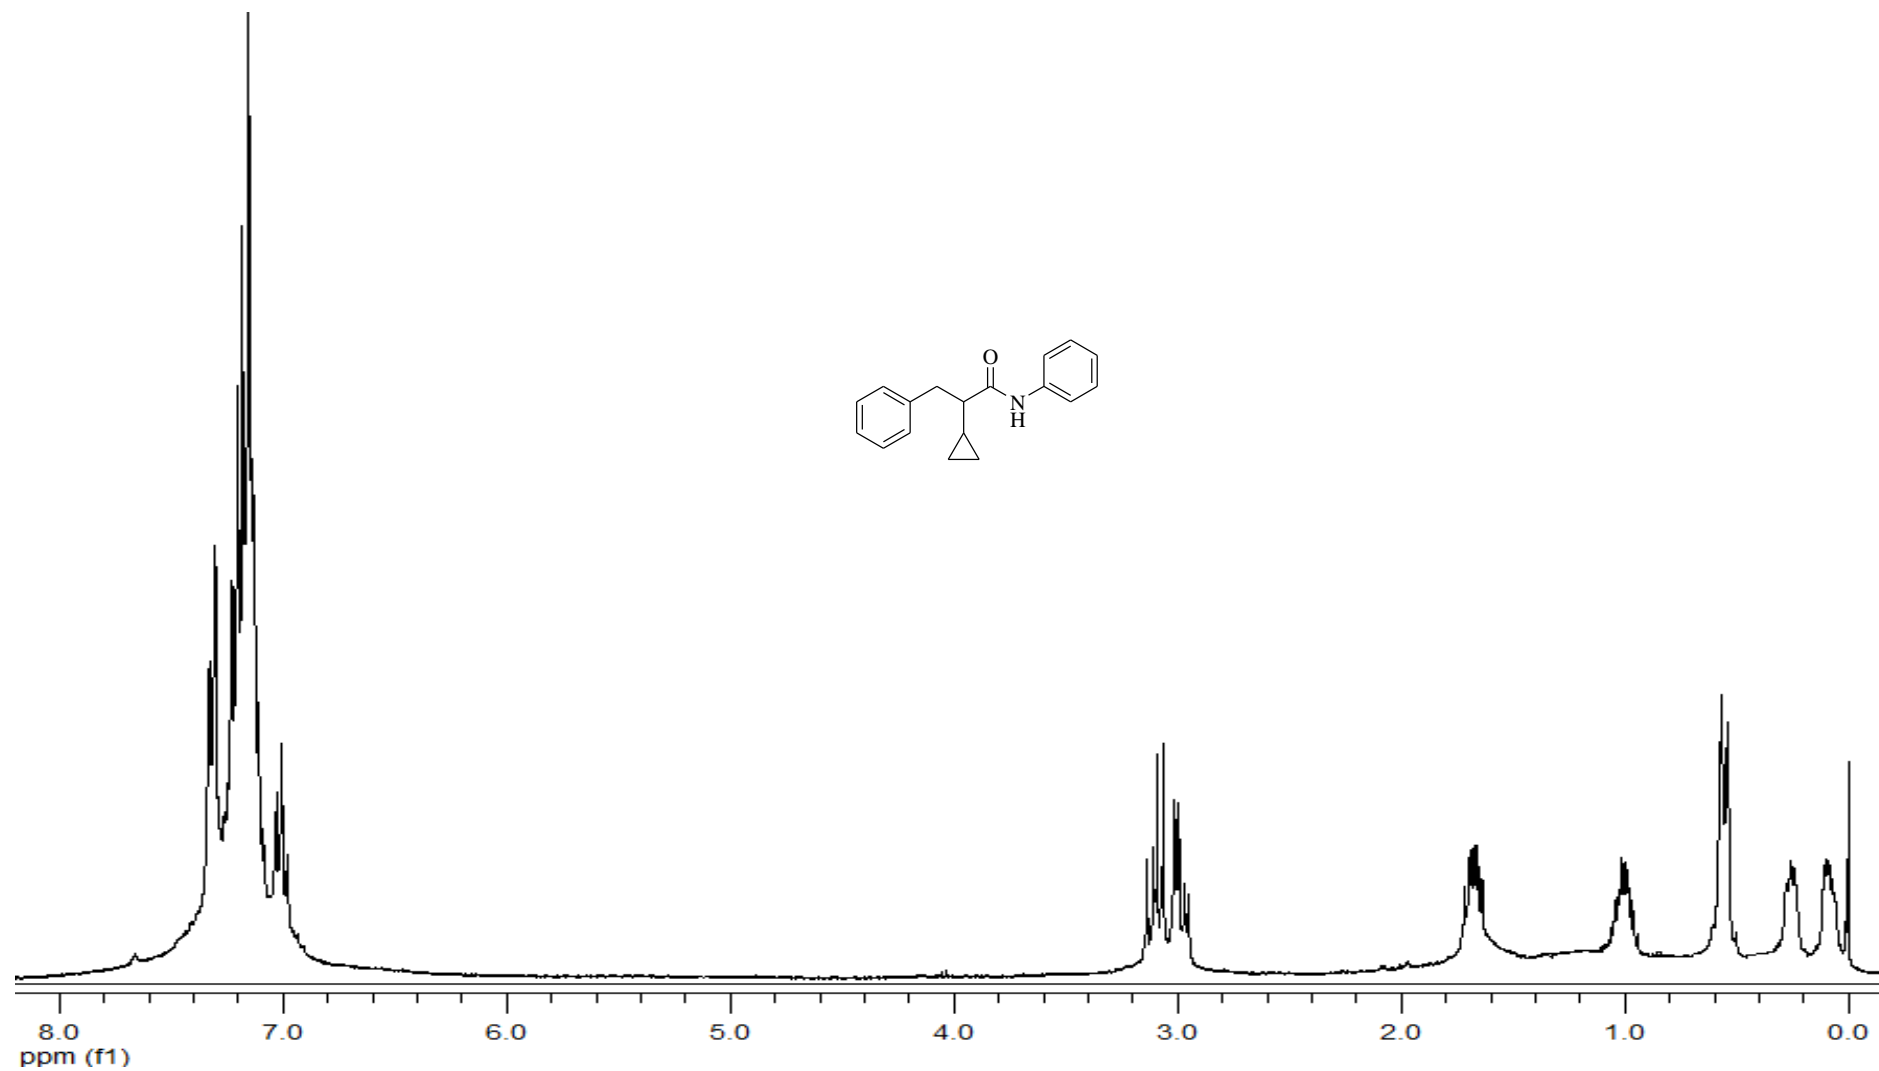

$^{13}\text{C}$ -NMR spectrum of 2-cyclopropyl-*N*,3-diphenylpropanamide (**2b**)

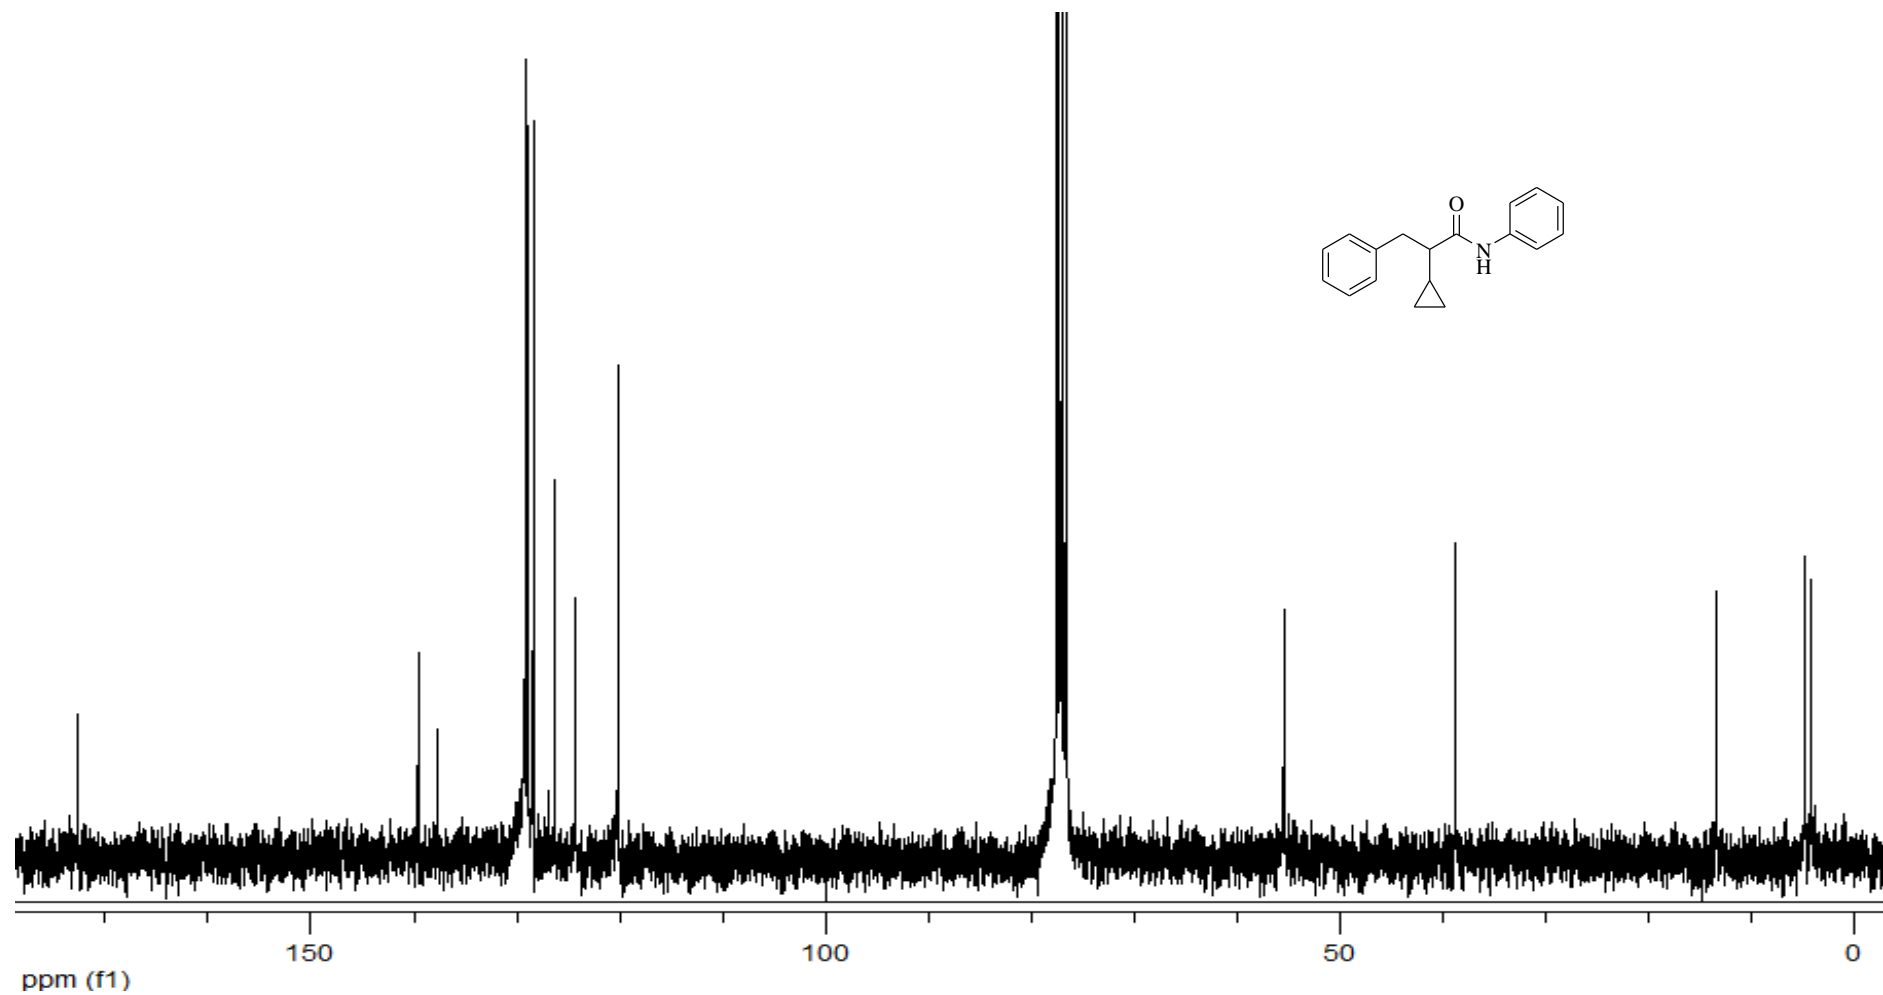

X-Ray structure of 2-cyclopropyl-*N*,3-diphenylpropanamide (**2b**): crystallographic data have been deposited with the Cambridge Crystallographic Data Centre (CCDC 860535 & 860536)

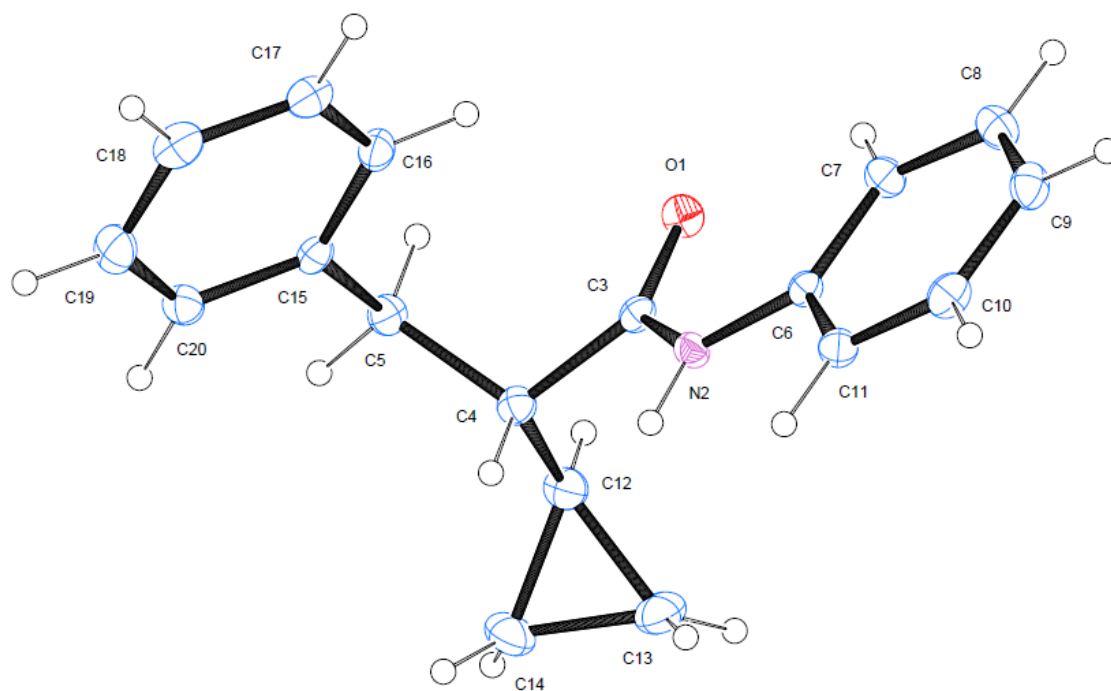

Crystal data and structure refinement for 2-cyclopropyl-*N*,3-diphenylpropanamide, **2b**

|                                   |                                             |                 |
|-----------------------------------|---------------------------------------------|-----------------|
| Empirical formula                 | C <sub>18</sub> H <sub>19</sub> NO          |                 |
| Formula weight                    | 265.34                                      |                 |
| Temperature                       | 100(2) K                                    |                 |
| Wavelength                        | 0.71073 Å                                   |                 |
| Crystal system                    | Monoclinic                                  |                 |
| Space group                       | P2 <sub>1</sub> /c                          |                 |
| Unit cell dimensions              | a = 9.7754(7) Å                             | α = 90°         |
|                                   | b = 17.6008(15) Å                           | β = 113.841(4)° |
|                                   | c = 9.5625(7) Å                             | γ = 90°         |
| Volume                            | 1504.9(2) Å <sup>3</sup>                    |                 |
| Z                                 | 4                                           |                 |
| Density (calculated)              | 1.171 Mg/m <sup>3</sup>                     |                 |
| Absorption coefficient            | 0.072 mm <sup>-1</sup>                      |                 |
| F(000)                            | 568                                         |                 |
| Crystal size                      | 0.46 x 0.16 x 0.03 mm <sup>3</sup>          |                 |
| Theta range for data collection   | 2.28 to 26.37°                              |                 |
| Index ranges                      | -12 ≤ h ≤ 11, 0 ≤ k ≤ 22, 0 ≤ l ≤ 11        |                 |
| Reflections collected             | 23367                                       |                 |
| Independent reflections           | 3070 [R(int) = 0.0634]                      |                 |
| Completeness to theta = 26.37°    | 100.0 %                                     |                 |
| Max. and min. transmission        | 0.9887 and 0.9145                           |                 |
| Refinement method                 | Full-matrix least-squares on F <sup>2</sup> |                 |
| Data / restraints / parameters    | 3070 / 0 / 185                              |                 |
| Goodness-of-fit on F <sup>2</sup> | 1.025                                       |                 |
| Final R indices [I > 2σ(I)]       | R1 = 0.0476, wR2 = 0.0997                   |                 |
| R indices (all data)              | R1 = 0.0863, wR2 = 0.1153                   |                 |
| Largest diff. peak and hole       | 0.394 and -0.227 e.Å <sup>-3</sup>          |                 |

Atomic coordinates ( $\times 10^4$ ) and equivalent isotropic displacement parameters ( $\text{\AA}^2 \times 10^3$ ). U(eq) is defined as one third of the trace of the orthogonalized  $U^{ij}$  tensor.

|       | x        | y       | z        | U(eq) |
|-------|----------|---------|----------|-------|
| O(1)  | 1710(1)  | 2154(1) | 3894(1)  | 25(1) |
| N(2)  | 2294(2)  | 2118(1) | 1813(2)  | 21(1) |
| C(3)  | 1461(2)  | 2348(1) | 2568(2)  | 21(1) |
| C(4)  | 193(2)   | 2889(1) | 1688(2)  | 24(1) |
| C(5)  | -1306(2) | 2580(1) | 1618(2)  | 25(1) |
| C(6)  | 3561(2)  | 1636(1) | 2324(2)  | 20(1) |
| C(7)  | 4194(2)  | 1319(1) | 3779(2)  | 25(1) |
| C(8)  | 5464(2)  | 872(1)  | 4178(2)  | 30(1) |
| C(9)  | 6096(2)  | 727(1)  | 3148(2)  | 30(1) |
| C(10) | 5449(2)  | 1034(1) | 1694(2)  | 29(1) |
| C(11) | 4198(2)  | 1490(1) | 1282(2)  | 25(1) |
| C(12) | 550(2)   | 3658(1) | 2450(2)  | 30(1) |
| C(13) | 1693(2)  | 4147(1) | 2213(2)  | 39(1) |
| C(14) | 63(2)    | 4355(1) | 1482(2)  | 40(1) |
| C(15) | -1881(2) | 1904(1) | 576(2)   | 23(1) |
| C(16) | -1186(2) | 1198(1) | 940(2)   | 26(1) |
| C(17) | -1718(2) | 583(1)  | -36(2)   | 30(1) |
| C(18) | -2971(2) | 654(1)  | -1384(2) | 33(1) |
| C(19) | -3679(2) | 1351(1) | -1759(2) | 34(1) |
| C(20) | -3134(2) | 1974(1) | -801(2)  | 29(1) |

Bond lengths [ $\text{\AA}$ ] and angles [ $^\circ$ ]

|            |            |
|------------|------------|
| O(1)-C(3)  | 1.2385(19) |
| N(2)-C(3)  | 1.350(2)   |
| N(2)-C(6)  | 1.415(2)   |
| N(2)-H(2)  | 0.875(19)  |
| C(3)-C(4)  | 1.520(2)   |
| C(4)-C(12) | 1.509(3)   |
| C(4)-C(5)  | 1.539(2)   |
| C(4)-H(4)  | 1.0000     |



|                |            |
|----------------|------------|
| C(5)-C(15)     | 1.508(2)   |
| C(5)-H(5A)     | 0.9900     |
| C(5)-H(5B)     | 0.9900     |
| C(6)-C(7)      | 1.391(2)   |
| C(6)-C(11)     | 1.396(2)   |
| C(7)-C(8)      | 1.387(3)   |
| C(7)-H(7)      | 0.9500     |
| C(8)-C(9)      | 1.381(2)   |
| C(8)-H(8)      | 0.9500     |
| C(9)-C(10)     | 1.383(3)   |
| C(9)-H(9)      | 0.9500     |
| C(10)-C(11)    | 1.381(3)   |
| C(10)-H(10)    | 0.9500     |
| C(11)-H(11)    | 0.9500     |
| C(12)-C(14)    | 1.495(3)   |
| C(12)-C(13)    | 1.499(3)   |
| C(12)-H(12)    | 1.0000     |
| C(13)-C(14)    | 1.504(3)   |
| C(13)-H(13A)   | 0.9900     |
| C(13)-H(13B)   | 0.9900     |
| C(14)-H(14A)   | 0.9900     |
| C(14)-H(14B)   | 0.9900     |
| C(15)-C(16)    | 1.391(3)   |
| C(15)-C(20)    | 1.395(2)   |
| C(16)-C(17)    | 1.384(3)   |
| C(16)-H(16)    | 0.9500     |
| C(17)-C(18)    | 1.379(3)   |
| C(17)-H(17)    | 0.9500     |
| C(18)-C(19)    | 1.381(3)   |
| C(18)-H(18)    | 0.9500     |
| C(19)-C(20)    | 1.390(3)   |
| C(19)-H(19)    | 0.9500     |
| C(20)-H(20)    | 0.9500     |
|                |            |
| C(3)-N(2)-C(6) | 128.87(15) |
| C(3)-N(2)-H(2) | 114.0(12)  |
| C(6)-N(2)-H(2) | 117.1(12)  |
| O(1)-C(3)-N(2) | 123.61(16) |

|                   |            |
|-------------------|------------|
| O(1)-C(3)-C(4)    | 121.25(14) |
| N(2)-C(3)-C(4)    | 115.13(14) |
| C(12)-C(4)-C(3)   | 108.44(14) |
| C(12)-C(4)-C(5)   | 111.57(14) |
| C(3)-C(4)-C(5)    | 110.63(14) |
| C(12)-C(4)-H(4)   | 108.7      |
| C(3)-C(4)-H(4)    | 108.7      |
| C(5)-C(4)-H(4)    | 108.7      |
| C(15)-C(5)-C(4)   | 113.67(13) |
| C(15)-C(5)-H(5A)  | 108.8      |
| C(4)-C(5)-H(5A)   | 108.8      |
| C(15)-C(5)-H(5B)  | 108.8      |
| C(4)-C(5)-H(5B)   | 108.8      |
| H(5A)-C(5)-H(5B)  | 107.7      |
| C(7)-C(6)-C(11)   | 119.53(16) |
| C(7)-C(6)-N(2)    | 124.04(15) |
| C(11)-C(6)-N(2)   | 116.42(15) |
| C(8)-C(7)-C(6)    | 119.38(16) |
| C(8)-C(7)-H(7)    | 120.3      |
| C(6)-C(7)-H(7)    | 120.3      |
| C(9)-C(8)-C(7)    | 121.11(17) |
| C(9)-C(8)-H(8)    | 119.4      |
| C(7)-C(8)-H(8)    | 119.4      |
| C(8)-C(9)-C(10)   | 119.35(17) |
| C(8)-C(9)-H(9)    | 120.3      |
| C(10)-C(9)-H(9)   | 120.3      |
| C(11)-C(10)-C(9)  | 120.41(16) |
| C(11)-C(10)-H(10) | 119.8      |
| C(9)-C(10)-H(10)  | 119.8      |
| C(10)-C(11)-C(6)  | 120.20(16) |
| C(10)-C(11)-H(11) | 119.9      |
| C(6)-C(11)-H(11)  | 119.9      |
| C(14)-C(12)-C(13) | 60.28(13)  |
| C(14)-C(12)-C(4)  | 118.91(16) |
| C(13)-C(12)-C(4)  | 118.85(16) |
| C(14)-C(12)-H(12) | 115.8      |
| C(13)-C(12)-H(12) | 115.8      |
| C(4)-C(12)-H(12)  | 115.8      |

|                     |            |
|---------------------|------------|
| C(12)-C(13)-C(14)   | 59.73(13)  |
| C(12)-C(13)-H(13A)  | 117.8      |
| C(14)-C(13)-H(13A)  | 117.8      |
| C(12)-C(13)-H(13B)  | 117.8      |
| C(14)-C(13)-H(13B)  | 117.8      |
| H(13A)-C(13)-H(13B) | 114.9      |
| C(12)-C(14)-C(13)   | 59.99(13)  |
| C(12)-C(14)-H(14A)  | 117.8      |
| C(13)-C(14)-H(14A)  | 117.8      |
| C(12)-C(14)-H(14B)  | 117.8      |
| C(13)-C(14)-H(14B)  | 117.8      |
| H(14A)-C(14)-H(14B) | 114.9      |
| C(16)-C(15)-C(20)   | 117.95(16) |
| C(16)-C(15)-C(5)    | 121.76(16) |
| C(20)-C(15)-C(5)    | 120.29(16) |
| C(17)-C(16)-C(15)   | 121.10(17) |
| C(17)-C(16)-H(16)   | 119.5      |
| C(15)-C(16)-H(16)   | 119.5      |
| C(18)-C(17)-C(16)   | 120.59(19) |
| C(18)-C(17)-H(17)   | 119.7      |
| C(16)-C(17)-H(17)   | 119.7      |
| C(17)-C(18)-C(19)   | 119.08(18) |
| C(17)-C(18)-H(18)   | 120.5      |
| C(19)-C(18)-H(18)   | 120.5      |
| C(18)-C(19)-C(20)   | 120.67(18) |
| C(18)-C(19)-H(19)   | 119.7      |
| C(20)-C(19)-H(19)   | 119.7      |
| C(19)-C(20)-C(15)   | 120.60(18) |
| C(19)-C(20)-H(20)   | 119.7      |
| C(15)-C(20)-H(20)   | 119.7      |

---

Anisotropic displacement parameters ( $\text{\AA}^2 \times 10^3$ ). The anisotropic displacement factor exponent takes the form:  $-2\pi^2 [ h^2 a^{*2} U^{11} + \dots + 2 h k a^* b^* U^{12} ]$

---

|      | $U^{11}$ | $U^{22}$ | $U^{33}$ | $U^{23}$ | $U^{13}$ | $U^{12}$ |
|------|----------|----------|----------|----------|----------|----------|
| O(1) | 28(1)    | 30(1)    | 19(1)    | -2(1)    | 12(1)    | 1(1)     |

---

|       |       |       |       |       |       |        |
|-------|-------|-------|-------|-------|-------|--------|
| N(2)  | 21(1) | 25(1) | 18(1) | 4(1)  | 8(1)  | 2(1)   |
| C(3)  | 21(1) | 20(1) | 21(1) | -4(1) | 9(1)  | -5(1)  |
| C(4)  | 25(1) | 24(1) | 24(1) | -1(1) | 10(1) | -1(1)  |
| C(5)  | 24(1) | 25(1) | 28(1) | 0(1)  | 12(1) | 2(1)   |
| C(6)  | 20(1) | 19(1) | 21(1) | -2(1) | 7(1)  | -3(1)  |
| C(7)  | 28(1) | 27(1) | 21(1) | 0(1)  | 10(1) | 2(1)   |
| C(8)  | 32(1) | 30(1) | 23(1) | 1(1)  | 6(1)  | 3(1)   |
| C(9)  | 23(1) | 27(1) | 37(1) | -4(1) | 10(1) | 3(1)   |
| C(10) | 28(1) | 31(1) | 33(1) | -5(1) | 18(1) | -2(1)  |
| C(11) | 25(1) | 30(1) | 21(1) | 2(1)  | 10(1) | -1(1)  |
| C(12) | 33(1) | 27(1) | 27(1) | -1(1) | 11(1) | -1(1)  |
| C(13) | 44(1) | 29(1) | 43(1) | 0(1)  | 17(1) | -10(1) |
| C(14) | 45(1) | 24(1) | 39(1) | 6(1)  | 7(1)  | 3(1)   |
| C(15) | 20(1) | 26(1) | 25(1) | -1(1) | 12(1) | -3(1)  |
| C(16) | 20(1) | 29(1) | 30(1) | -1(1) | 10(1) | -1(1)  |
| C(17) | 32(1) | 25(1) | 38(1) | -2(1) | 20(1) | -2(1)  |
| C(18) | 41(1) | 33(1) | 30(1) | -9(1) | 18(1) | -10(1) |
| C(19) | 33(1) | 46(1) | 20(1) | -3(1) | 6(1)  | -6(1)  |
| C(20) | 27(1) | 32(1) | 28(1) | 5(1)  | 12(1) | 1(1)   |

Hydrogen coordinates (  $\times 10^4$ ) and isotropic displacement parameters ( $\text{\AA}^2 \times 10^3$ )

|        | x        | y        | z       | U(eq) |
|--------|----------|----------|---------|-------|
| H(2)   | 2000(20) | 2306(11) | 890(20) | 30(5) |
| H(4)   | 129      | 2939     | 621     | 29    |
| H(5A)  | -1184    | 2435     | 2661    | 30    |
| H(5B)  | -2062    | 2991     | 1263    | 30    |
| H(7)   | 3761     | 1408     | 4492    | 30    |
| H(8)   | 5907     | 662      | 5177    | 36    |
| H(9)   | 6965     | 420      | 3435    | 35    |
| H(10)  | 5869     | 931      | 975     | 35    |
| H(11)  | 3770     | 1705     | 287     | 30    |
| H(12)  | 523      | 3690     | 3483    | 35    |
| H(13A) | 2163     | 3950     | 1542    | 47    |

|        |       |      |       |    |
|--------|-------|------|-------|----|
| H(13B) | 2356  | 4459 | 3084  | 47 |
| H(14A) | -274  | 4796 | 1904  | 47 |
| H(14B) | -467  | 4287 | 363   | 47 |
| H(16)  | -333  | 1136 | 1873  | 32 |
| H(17)  | -1216 | 109  | 226   | 36 |
| H(18)  | -3342 | 231  | -2045 | 40 |
| H(19)  | -4547 | 1404 | -2682 | 41 |
| H(20)  | -3620 | 2451 | -1086 | 34 |

---

### Torsion angles [°]

---

|                        |             |
|------------------------|-------------|
| C(6)-N(2)-C(3)-O(1)    | -0.2(3)     |
| C(6)-N(2)-C(3)-C(4)    | 178.26(16)  |
| O(1)-C(3)-C(4)-C(12)   | 66.5(2)     |
| N(2)-C(3)-C(4)-C(12)   | -112.00(16) |
| O(1)-C(3)-C(4)-C(5)    | -56.1(2)    |
| N(2)-C(3)-C(4)-C(5)    | 125.35(16)  |
| C(12)-C(4)-C(5)-C(15)  | 167.37(15)  |
| C(3)-C(4)-C(5)-C(15)   | -71.82(18)  |
| C(3)-N(2)-C(6)-C(7)    | -1.3(3)     |
| C(3)-N(2)-C(6)-C(11)   | 179.61(17)  |
| C(11)-C(6)-C(7)-C(8)   | 1.0(3)      |
| N(2)-C(6)-C(7)-C(8)    | -178.12(16) |
| C(6)-C(7)-C(8)-C(9)    | -1.0(3)     |
| C(7)-C(8)-C(9)-C(10)   | 0.1(3)      |
| C(8)-C(9)-C(10)-C(11)  | 0.9(3)      |
| C(9)-C(10)-C(11)-C(6)  | -1.0(3)     |
| C(7)-C(6)-C(11)-C(10)  | 0.0(3)      |
| N(2)-C(6)-C(11)-C(10)  | 179.17(16)  |
| C(3)-C(4)-C(12)-C(14)  | 146.07(16)  |
| C(5)-C(4)-C(12)-C(14)  | -91.85(19)  |
| C(3)-C(4)-C(12)-C(13)  | 76.09(19)   |
| C(5)-C(4)-C(12)-C(13)  | -161.84(16) |
| C(4)-C(12)-C(13)-C(14) | 108.73(19)  |
| C(4)-C(12)-C(14)-C(13) | -108.63(19) |
| C(4)-C(5)-C(15)-C(16)  | 70.0(2)     |
| C(4)-C(5)-C(15)-C(20)  | -109.61(18) |

|                         |             |
|-------------------------|-------------|
| C(20)-C(15)-C(16)-C(17) | 0.3(2)      |
| C(5)-C(15)-C(16)-C(17)  | -179.36(15) |
| C(15)-C(16)-C(17)-C(18) | -1.2(3)     |
| C(16)-C(17)-C(18)-C(19) | 0.8(3)      |
| C(17)-C(18)-C(19)-C(20) | 0.5(3)      |
| C(18)-C(19)-C(20)-C(15) | -1.4(3)     |
| C(16)-C(15)-C(20)-C(19) | 1.0(2)      |
| C(5)-C(15)-C(20)-C(19)  | -179.33(15) |

---

Hydrogen bonds [ $\text{\AA}$  and  $^\circ$ ].

---

| D-H...A            | d(D-H)    | d(H...A) | d(D...A)   | $\angle(\text{DHA})$ |
|--------------------|-----------|----------|------------|----------------------|
| N(2)-H(2)...O(1)#1 | 0.875(19) | 2.05(2)  | 2.9105(19) | 169.3(17)            |

---

Symmetry transformations used to generate equivalent atoms: #1 x,-y+1/2,z-1/2

## Geometries of the stationary points

### *c-1a*

E (RB+HF - LYP) = -940,482232907 a.u.

|   |             |             |             |
|---|-------------|-------------|-------------|
| C | 0.27901600  | 1.44105300  | 1.00652900  |
| C | 0.29201000  | 1.32900200  | -0.39025500 |
| C | 0.77068900  | 2.40567300  | -1.14973700 |
| C | 1.23941800  | 3.56632300  | -0.52963800 |
| C | 1.22548200  | 3.66756900  | 0.86394100  |
| C | 0.74069400  | 2.60267400  | 1.62880000  |
| C | -0.16938400 | 0.07874500  | -1.09859200 |
| N | -1.18410600 | -0.74592200 | -0.40979800 |
| C | -2.54298100 | -0.49665300 | -0.14884200 |
| C | -3.34290400 | -1.48624800 | 0.45030200  |
| C | -4.69202100 | -1.22503000 | 0.68912900  |
| C | -5.25833600 | 0.00634800  | 0.34348800  |
| C | -4.45687100 | 0.98539500  | -0.24873600 |
| C | -3.10449000 | 0.74227100  | -0.49539800 |
| C | 0.76448200  | -1.21475400 | -1.08734900 |
| C | -0.41074000 | -1.89268900 | -0.36135400 |
| O | -0.63441200 | -3.00392000 | 0.07492700  |
| C | 2.12608500  | -1.17922200 | -0.44290200 |
| C | 2.32753400  | -1.56616400 | 0.88917700  |
| C | 3.60273900  | -1.51576700 | 1.45931900  |
| C | 4.69464600  | -1.07791300 | 0.70676800  |
| C | 4.50599100  | -0.69603900 | -0.62503000 |
| C | 3.23255600  | -0.75195200 | -1.19345700 |
| H | -0.48340800 | 0.32883200  | -2.12008200 |
| H | 0.84728400  | -1.61170600 | -2.10676300 |
| H | -2.90427300 | -2.44184200 | 0.71342500  |
| H | -5.30498200 | -1.99540800 | 1.15016500  |
| H | -6.31021300 | 0.20011900  | 0.53484200  |
| H | -4.88113400 | 1.94861000  | -0.52050000 |
| H | -2.48755200 | 1.51369800  | -0.94532400 |
| H | 1.49156300  | -1.93250700 | 1.47800900  |
| H | 3.74142300  | -1.82653700 | 2.49180900  |
| H | 5.68623700  | -1.04178500 | 1.15067200  |
| H | 5.35021300  | -0.36113600 | -1.22254500 |
| H | 3.09505200  | -0.46107700 | -2.23321400 |
| H | 0.77417700  | 2.33721700  | -2.23633200 |
| H | 1.60788600  | 4.39111800  | -1.13436100 |
| H | 1.58383900  | 4.57124500  | 1.35012100  |
| H | 0.71996600  | 2.67585200  | 2.71314600  |
| H | -0.10373600 | 0.62239600  | 1.60911800  |

#####

#####

*c-1a*<sup>-</sup>

E (UB+HF - LYP) = -940,475487116 a.u.

|   |             |             |             |
|---|-------------|-------------|-------------|
| C | 0.98849600  | 2.26457200  | -1.07179200 |
| C | 0.29762900  | 1.27640500  | -0.34916800 |
| C | 0.09449500  | 1.45314400  | 1.02277700  |
| C | 0.56611900  | 2.60609000  | 1.67098400  |
| C | 1.26982800  | 3.57983600  | 0.94635300  |
| C | 1.48204500  | 3.40891800  | -0.42153400 |
| C | -0.17475900 | 0.03884000  | -1.07094100 |
| N | -1.22376000 | -0.74616300 | -0.39603000 |
| C | -2.56603300 | -0.47115300 | -0.18351300 |
| C | -3.41009800 | -1.43075000 | 0.44278900  |
| C | -4.75981500 | -1.14778900 | 0.62878000  |
| C | -5.32055400 | 0.07320200  | 0.22068400  |
| C | -4.47624800 | 1.02938300  | -0.37890400 |
| C | -3.12496500 | 0.76947800  | -0.57783000 |
| C | 0.73510200  | -1.25796100 | -1.00835100 |
| C | -0.40891200 | -1.86590600 | -0.20627200 |
| O | -0.64462700 | -2.96815800 | 0.29408500  |
| C | 2.12663600  | -1.19280100 | -0.44102000 |
| C | 3.14613600  | -0.57555500 | -1.19412800 |
| C | 4.44653100  | -0.46719900 | -0.67752600 |
| C | 4.75362200  | -1.01090200 | 0.57004500  |
| C | 3.75374200  | -1.66430900 | 1.30894200  |
| C | 2.44558100  | -1.73762600 | 0.80726600  |
| H | -0.45601900 | 0.29211100  | -2.10585000 |
| H | 0.78979200  | -1.69836600 | -2.03496200 |
| H | -2.98513400 | -2.37760200 | 0.75650400  |
| H | -5.39002300 | -1.89890600 | 1.10368200  |
| H | -6.37729600 | 0.28001400  | 0.37123600  |
| H | -4.87930100 | 1.99063700  | -0.69363400 |
| H | -2.48880900 | 1.52422500  | -1.03193600 |
| H | 1.66898900  | -2.23688700 | 1.37969600  |
| H | 3.98743400  | -2.10690300 | 2.27513000  |
| H | 5.76414100  | -0.93029300 | 0.96770100  |
| H | 5.21679500  | 0.04133600  | -1.25570100 |
| H | 2.91474900  | -0.17189100 | -2.17816800 |
| H | 1.14486200  | 2.13589400  | -2.14162700 |
| H | 2.02979300  | 4.15952500  | -0.98852400 |
| H | 1.64803100  | 4.46767900  | 1.45044500  |
| H | 0.39567700  | 2.73399100  | 2.73754900  |
| H | -0.44779600 | 0.69634500  | 1.58212700  |

#####  
#####



***c-1a-TS(N-C2)***

E (UB+HF - LYP) = -940,451007888 a.u.

1 imaginary frequency -44,83 cm<sup>\*\*</sup>-1

|   |             |             |             |
|---|-------------|-------------|-------------|
| C | -0.29609200 | 1.52192900  | 1.11686700  |
| C | 0.07012400  | 1.07630600  | -0.16092700 |
| C | 0.74706100  | 1.96758000  | -1.00573000 |
| C | 1.06552100  | 3.26304500  | -0.58821600 |
| C | 0.70340800  | 3.69286700  | 0.69223700  |
| C | 0.01895100  | 2.81571100  | 1.54088500  |
| C | -0.25766200 | -0.34648200 | -0.62625300 |
| N | -1.34311000 | -1.00204100 | 0.04923100  |
| C | -2.63399500 | -0.65356800 | -0.13158100 |
| C | -3.65034700 | -1.38280000 | 0.57007900  |
| C | -4.99858600 | -1.09667800 | 0.41375700  |
| C | -5.43758400 | -0.07305500 | -0.44838100 |
| C | -4.46550100 | 0.65714900  | -1.14241200 |
| C | -3.10317100 | 0.39184200  | -0.99336300 |
| C | 0.84977600  | -1.41353400 | -0.31296200 |
| C | 0.26959500  | -1.95569800 | 1.02986600  |
| O | 0.25197800  | -3.10727100 | 1.38964000  |
| C | 2.31125500  | -1.04854300 | -0.25313500 |
| C | 2.85273200  | -0.29103500 | 0.80120000  |
| C | 4.21309500  | 0.02241800  | 0.83722600  |
| C | 5.06918500  | -0.41087100 | -0.18064600 |
| C | 4.54856100  | -1.17026800 | -1.23280700 |
| C | 3.18707400  | -1.48502600 | -1.26151500 |
| H | -0.38767400 | -0.29374200 | -1.72557000 |
| H | 0.72309300  | -2.21239300 | -1.05892800 |
| H | -3.32493100 | -2.18305500 | 1.23102200  |
| H | -5.73063100 | -1.68325300 | 0.97008000  |
| H | -6.49665300 | 0.14581800  | -0.56695400 |
| H | -4.77160700 | 1.46214100  | -1.81201900 |
| H | -2.38398700 | 0.99834200  | -1.53719200 |
| H | 2.19745600  | 0.05025100  | 1.59626700  |
| H | 4.60563700  | 0.61119800  | 1.66407700  |
| H | 6.12825300  | -0.16209600 | -0.15244800 |
| H | 5.20163100  | -1.52197000 | -2.02950000 |
| H | 2.79101000  | -2.08398900 | -2.07973900 |
| H | 1.03106000  | 1.63899000  | -2.00484700 |
| H | 1.59457200  | 3.93554600  | -1.26149000 |
| H | 0.94452400  | 4.70182800  | 1.02191700  |
| H | -0.27836200 | 3.14381200  | 2.53546100  |
| H | -0.83784500 | 0.83730000  | 1.76298600  |

#####  
#####

**c-1a-TS(C2-C3)**

E (UB+HF - LYP) = -940,444226993 a.u.

1 imaginary frequency -112,36 cm<sup>\*\*</sup>-1

|   |             |             |             |
|---|-------------|-------------|-------------|
| C | -0.06696800 | -0.09830200 | -1.05085300 |
| C | 1.22142300  | -0.89332500 | -1.22131400 |
| H | -0.47243100 | 0.05734500  | -2.06531100 |
| H | 1.35694800  | -1.27559200 | -2.23045900 |
| C | 2.42682400  | -0.81388100 | -0.45804700 |
| C | 0.06958900  | 1.29608300  | -0.44209600 |
| N | -0.97239900 | -0.99974500 | -0.30312600 |
| C | -0.36257000 | -2.30217800 | -0.37902500 |
| C | -2.33688000 | -0.75498900 | -0.09691100 |
| O | -0.77322700 | -3.26380000 | 0.24772400  |
| C | -3.08285000 | -1.54798600 | 0.80917900  |
| C | -4.44835900 | -1.32913000 | 0.98264100  |
| C | -5.11728700 | -0.31469800 | 0.28575100  |
| C | -4.38527700 | 0.47813200  | -0.60454500 |
| C | -3.02052800 | 0.26361200  | -0.80080200 |
| H | -2.57505300 | -2.33651300 | 1.34998100  |
| H | -4.99633100 | -1.95846900 | 1.68229300  |
| H | -6.18047000 | -0.14235700 | 0.43817700  |
| H | -4.87821500 | 1.27840400  | -1.15438800 |
| H | -2.47907600 | 0.90146500  | -1.49110200 |
| C | 0.60028200  | 2.32224000  | -1.23905800 |
| C | 0.76034400  | 3.61702900  | -0.74319700 |
| C | 0.38333000  | 3.91653200  | 0.57147200  |
| C | -0.15057200 | 2.90561100  | 1.37318400  |
| C | -0.30644500 | 1.60912600  | 0.87036900  |
| H | 0.90555600  | 2.09222200  | -2.25849200 |
| H | 1.18122100  | 4.39185500  | -1.38126600 |
| H | 0.50657500  | 4.92408500  | 0.96355100  |
| H | -0.44953600 | 3.12229200  | 2.39698900  |
| H | -0.72900200 | 0.83279300  | 1.50087800  |
| C | 2.51978100  | -0.38903400 | 0.90484400  |
| C | 3.72954600  | -0.38412400 | 1.59134900  |
| C | 4.92048600  | -0.81634200 | 0.98621100  |
| C | 4.85539800  | -1.26706500 | -0.34468700 |
| C | 3.65443000  | -1.26490300 | -1.04147000 |
| H | 1.62170800  | -0.07954500 | 1.42734400  |
| H | 3.74315700  | -0.04760400 | 2.62808700  |
| H | 5.86093000  | -0.81400300 | 1.53289700  |
| H | 5.75889400  | -1.61880300 | -0.84324300 |
| H | 3.63555800  | -1.61340500 | -2.07381600 |

#####  
#####

**c-1a-TS(C3-C4)**

E (UB+HF - LYP) = -940,470784418 a.u.

1 imaginary frequency -255,86 cm<sup>\*\*</sup>-1

|   |             |             |             |
|---|-------------|-------------|-------------|
| C | -0.20852200 | 0.22514700  | -1.07117700 |
| C | 0.93163600  | -1.15848200 | -1.03881200 |
| H | -0.47713700 | 0.38799600  | -2.12211600 |
| H | 0.96419800  | -1.41033600 | -2.10959500 |
| C | 2.27415700  | -1.16099300 | -0.45006200 |
| C | 0.07182200  | 1.48350500  | -0.38467900 |
| N | -1.10523000 | -0.75390300 | -0.42730100 |
| C | -0.23305700 | -1.83119400 | -0.34577900 |
| C | -2.47326800 | -0.65145100 | -0.16355500 |
| O | -0.42200400 | -2.95543400 | 0.10953600  |
| C | -3.18737100 | -1.73352800 | 0.39935000  |
| C | -4.55428600 | -1.61227500 | 0.64362000  |
| C | -5.24275700 | -0.42825100 | 0.34797100  |
| C | -4.53138600 | 0.64401000  | -0.20404600 |
| C | -3.16546800 | 0.54049200  | -0.46426400 |
| H | -2.65541500 | -2.64825500 | 0.63219200  |
| H | -5.08815100 | -2.45747300 | 1.07466300  |
| H | -6.30916400 | -0.34325400 | 0.54418000  |
| H | -5.04275200 | 1.57669100  | -0.43458100 |
| H | -2.62058800 | 1.38159400  | -0.87947700 |
| C | 2.53866400  | -1.54964900 | 0.88894400  |
| C | 3.82156400  | -1.49793900 | 1.41891200  |
| C | 4.90810300  | -1.03341000 | 0.64437200  |
| C | 4.66474500  | -0.64066100 | -0.68002700 |
| C | 3.38235600  | -0.70246300 | -1.21973700 |
| H | 1.72118500  | -1.92070300 | 1.50226000  |
| H | 3.98738400  | -1.82107900 | 2.44588700  |
| H | 5.90907000  | -0.97841600 | 1.06664300  |
| H | 5.48684900  | -0.27993400 | -1.29800900 |
| H | 3.21494100  | -0.38966900 | -2.24984700 |
| C | 0.32807900  | 2.66455900  | -1.13094200 |
| C | 0.67590400  | 3.85818700  | -0.51278700 |
| C | 0.79068600  | 3.93008200  | 0.89534300  |
| C | 0.54664100  | 2.76842900  | 1.64714700  |
| C | 0.19749300  | 1.56918200  | 1.03412500  |
| H | 0.24365200  | 2.62794300  | -2.21778700 |
| H | 0.85782900  | 4.74420800  | -1.11989500 |
| H | 1.06365900  | 4.86243700  | 1.38411200  |
| H | 0.63318200  | 2.80259500  | 2.73279900  |
| H | 0.00948800  | 0.68665100  | 1.63989100  |

#####  
#####

***c-1a-TS(N-C4)***

E (UB+HF - LYP) = -940,46705545 a.u.

1 imaginary frequency -501,33 cm<sup>\*\*</sup>-1

|   |             |             |             |
|---|-------------|-------------|-------------|
| C | 0.02058800  | 0.24914600  | -1.23627900 |
| C | 0.90916300  | -1.05697500 | -1.20654500 |
| H | -0.28629000 | 0.49809500  | -2.25515500 |
| H | 1.07316300  | -1.37712000 | -2.24866300 |
| C | 2.24248800  | -1.05039700 | -0.50282100 |
| C | 0.27480200  | 1.44788200  | -0.46127400 |
| N | -1.15808000 | -0.83310600 | -0.66332900 |
| C | -0.26131700 | -1.85432800 | -0.61831700 |
| C | -2.46999900 | -0.72727800 | -0.22884900 |
| O | -0.37583200 | -3.02847200 | -0.26002400 |
| C | -3.02070400 | -1.60846900 | 0.73328800  |
| C | -4.33291700 | -1.44018900 | 1.16712000  |
| C | -5.12983400 | -0.39078500 | 0.67964500  |
| C | -4.58384700 | 0.48590400  | -0.26756600 |
| C | -3.27837700 | 0.32254400  | -0.72611600 |
| H | -2.41159000 | -2.42535500 | 1.10510900  |
| H | -4.74242500 | -2.13810800 | 1.89630900  |
| H | -6.15111200 | -0.26110600 | 1.03054800  |
| H | -5.18223800 | 1.30944900  | -0.65388500 |
| H | -2.86083400 | 1.01335800  | -1.45279100 |
| C | 2.53956300  | -1.92623300 | 0.55028500  |
| C | 3.79397500  | -1.89991100 | 1.17083900  |
| C | 4.76978900  | -0.98644400 | 0.75223200  |
| C | 4.48709100  | -0.11765800 | -0.30602900 |
| C | 3.24171500  | -0.15854500 | -0.93883000 |
| H | 1.78479300  | -2.63647200 | 0.87475400  |
| H | 4.00399000  | -2.58792000 | 1.98758200  |
| H | 5.74094400  | -0.95567200 | 1.24263400  |
| H | 5.23711500  | 0.59740600  | -0.63905800 |
| H | 3.02425800  | 0.52673200  | -1.75430900 |
| C | 0.04151300  | 2.73618500  | -1.03985200 |
| C | 0.22618300  | 3.90749500  | -0.32464100 |
| C | 0.63908100  | 3.86955800  | 1.03274800  |
| C | 0.82566700  | 2.60780300  | 1.63556500  |
| C | 0.63814800  | 1.42813700  | 0.92990600  |
| H | -0.27402700 | 2.79009300  | -2.08326800 |
| H | 0.05330700  | 4.86621900  | -0.81340500 |
| H | 0.77851300  | 4.78658500  | 1.60035000  |
| H | 1.11612000  | 2.55322500  | 2.68489100  |
| H | 0.77288900  | 0.47547300  | 1.43479200  |

#####  
#####

**c-1a-IN(N-C2)**

E (UB+HF - LYP) = -940,451937542 a.u.

|   |             |             |             |
|---|-------------|-------------|-------------|
| C | -0.35692700 | 1.53541600  | 1.31275700  |
| C | -0.01255200 | 1.02352100  | 0.05289600  |
| C | 0.56960700  | 1.89471300  | -0.87848700 |
| C | 0.81980100  | 3.23414800  | -0.56377800 |
| C | 0.48835800  | 3.72764700  | 0.70143700  |
| C | -0.10361000 | 2.87073400  | 1.63690200  |
| C | -0.28002900 | -0.44898900 | -0.29566600 |
| N | -1.41572200 | -1.03790800 | 0.35239200  |
| C | -2.65449500 | -0.72580800 | -0.07977200 |
| C | -3.77756200 | -1.34963400 | 0.56656400  |
| C | -5.08555100 | -1.11681700 | 0.17137200  |
| C | -5.38731600 | -0.24719000 | -0.89650300 |
| C | -4.31678700 | 0.38446700  | -1.54057500 |
| C | -2.99284800 | 0.16992300  | -1.15248500 |
| C | 0.88716400  | -1.40695200 | 0.12290600  |
| C | 0.72064000  | -1.65787900 | 1.64044600  |
| O | 0.89733300  | -2.68544500 | 2.22296800  |
| C | 2.31556700  | -1.02624800 | -0.20382700 |
| C | 3.01539200  | -0.03559300 | 0.50756100  |
| C | 4.33464300  | 0.28620400  | 0.18034900  |
| C | 4.98649500  | -0.37103700 | -0.86769800 |
| C | 4.30500700  | -1.36064200 | -1.58230100 |
| C | 2.98750400  | -1.68438100 | -1.24723900 |
| H | -0.32367800 | -0.49818900 | -1.40553300 |
| H | 0.65983700  | -2.36545200 | -0.36227100 |
| H | -3.55806100 | -2.03005300 | 1.38723700  |
| H | -5.89551100 | -1.62222000 | 0.69954700  |
| H | -6.41564100 | -0.06718700 | -1.20323500 |
| H | -4.51493600 | 1.07395500  | -2.36306900 |
| H | -2.20420600 | 0.70689300  | -1.67232200 |
| H | 2.51996300  | 0.48792800  | 1.31934600  |
| H | 4.85314500  | 1.05795000  | 0.74557800  |
| H | 6.01326400  | -0.11671600 | -1.12262200 |
| H | 4.79877400  | -1.88499300 | -2.39818200 |
| H | 2.46609600  | -2.46083900 | -1.80345500 |
| H | 0.82875200  | 1.51692700  | -1.86680500 |
| H | 1.27046200  | 3.89086000  | -1.30629100 |
| H | 0.67716600  | 4.77014000  | 0.95166800  |
| H | -0.37949300 | 3.24813700  | 2.62019500  |
| H | -0.83953500 | 0.86816600  | 2.02057000  |

#####  
#####

***c*-1a-IN(C2-C3)**

E (UB+HF - LYP) = -940,455246199 a.u.

|   |             |             |             |
|---|-------------|-------------|-------------|
| C | 3.91720500  | 0.61999800  | 0.53909900  |
| C | 2.64698500  | 0.15122500  | 0.07086900  |
| C | 2.70016800  | -0.92332300 | -0.87487000 |
| C | 3.90909200  | -1.44877300 | -1.32099500 |
| C | 5.13859600  | -0.95927600 | -0.85337500 |
| C | 5.11608600  | 0.08325300  | 0.09186000  |
| C | 1.44096800  | 0.72217700  | 0.56080900  |
| C | 0.09645500  | 0.48157600  | -0.06830500 |
| N | -0.54234400 | -0.64771000 | 0.66371200  |
| C | -1.56849200 | -1.43213800 | 0.11050400  |
| C | -1.91313600 | -2.69651100 | 0.64684800  |
| C | -2.92265400 | -3.46084500 | 0.06418900  |
| C | -3.61822000 | -3.01325000 | -1.06554700 |
| C | -3.28438900 | -1.76665400 | -1.60063800 |
| C | -2.28357500 | -0.98221100 | -1.02409400 |
| C | -0.73431200 | 1.76079900  | -0.07710200 |
| C | -0.67266600 | 2.62920900  | -1.17766200 |
| C | -1.37433600 | 3.83683400  | -1.18535700 |
| C | -2.15535300 | 4.20187800  | -0.08241600 |
| C | -2.22444200 | 3.34398900  | 1.01942800  |
| C | -1.52360000 | 2.13415800  | 1.02076300  |
| C | 0.08967800  | -0.78277200 | 1.92320100  |
| O | -0.13037200 | -1.70971700 | 2.69002600  |
| H | 0.21558000  | 0.15797500  | -1.11266600 |
| H | 1.52711300  | 1.58655900  | 1.21168600  |
| H | -1.37975900 | -3.05615600 | 1.51646500  |
| H | -3.16280100 | -4.42909400 | 0.50057500  |
| H | -4.40043500 | -3.62073400 | -1.51544200 |
| H | -3.81073400 | -1.38843400 | -2.47553300 |
| H | -2.06968500 | -0.00820400 | -1.44868000 |
| H | -0.05851800 | 2.35498000  | -2.03413100 |
| H | -1.31181400 | 4.49275400  | -2.05177400 |
| H | -2.70546600 | 5.14073200  | -0.08469300 |
| H | -2.83031400 | 3.61503600  | 1.88213000  |
| H | -1.58360600 | 1.46738400  | 1.87630600  |
| H | 1.77339400  | -1.35851900 | -1.24138400 |
| H | 3.89366600  | -2.26756100 | -2.04047300 |
| H | 6.07904600  | -1.38024000 | -1.20186600 |
| H | 6.05377900  | 0.48097500  | 0.48055800  |
| H | 3.92959200  | 1.42820000  | 1.26946300  |

#####  
#####

***c*-1a-IN(C3-C4)**

E (UB+HF - LYP) = -940,502339192 a.u.

|   |             |             |             |
|---|-------------|-------------|-------------|
| C | -0.70018400 | 3.51446800  | -1.01512100 |
| C | -0.60701500 | 2.33825100  | -0.21375800 |
| C | 0.18500800  | 2.42287700  | 0.97026300  |
| C | 0.83407200  | 3.60420800  | 1.30742400  |
| C | 0.73276300  | 4.75043800  | 0.50185900  |
| C | -0.04684000 | 4.68942100  | -0.66423600 |
| C | -1.33507800 | 1.18155500  | -0.61212000 |
| N | -1.27331100 | -0.07192300 | -0.04622200 |
| C | -2.40832100 | -0.88962900 | -0.04048700 |
| C | -2.28811100 | -2.29599000 | 0.04699300  |
| C | -3.41933500 | -3.10486700 | 0.01014000  |
| C | -4.70330300 | -2.55469500 | -0.11634400 |
| C | -4.83101000 | -1.16507100 | -0.18868300 |
| C | -3.70561700 | -0.33981100 | -0.14255000 |
| C | 0.03283400  | -0.65554200 | 0.45117100  |
| O | 0.03736200  | -1.05998600 | 1.63463500  |
| C | 1.02589000  | -0.66983300 | -0.52367500 |
| C | 2.37691000  | -1.14594600 | -0.34925200 |
| C | 3.28320800  | -1.10109000 | -1.44444300 |
| C | 4.59707900  | -1.54877400 | -1.33653700 |
| C | 5.07832200  | -2.06672000 | -0.12539500 |
| C | 4.20350300  | -2.12054100 | 0.96863000  |
| C | 2.88585800  | -1.67525200 | 0.86976200  |
| H | -2.05240100 | 1.29452600  | -1.42462200 |
| H | 0.76795100  | -0.27715000 | -1.50320400 |
| H | -1.30375200 | -2.73754800 | 0.14993000  |
| H | -3.29616800 | -4.18422700 | 0.07783600  |
| H | -5.58142000 | -3.19580900 | -0.14605900 |
| H | -5.81747900 | -0.71039700 | -0.26418400 |
| H | -3.82798000 | 0.73882300  | -0.15033500 |
| H | 2.21808400  | -1.72551700 | 1.72274500  |
| H | 4.55535700  | -2.51856700 | 1.92039600  |
| H | 6.10497100  | -2.41717000 | -0.03786500 |
| H | 5.25437000  | -1.49262000 | -2.20410200 |
| H | 2.93084100  | -0.69995900 | -2.39421900 |
| H | -1.29710700 | 3.48040300  | -1.92559300 |
| H | -0.14082800 | 5.56636000  | -1.30307800 |
| H | 1.24989200  | 5.66738000  | 0.77513900  |
| H | 1.43252700  | 3.63487400  | 2.21619300  |
| H | 0.27362300  | 1.55519100  | 1.61564500  |

#####  
#####

**c-1a-IN(N-C4)**

E (UB+HF - LYP) = -940,506891414 a.u.

|   |             |             |             |
|---|-------------|-------------|-------------|
| C | 2.91358900  | 0.85962500  | -1.18201200 |
| C | 2.61836000  | 0.10913500  | -0.01109300 |
| C | 3.73322200  | -0.39701600 | 0.71583900  |
| C | 5.04014000  | -0.15720200 | 0.28260100  |
| C | 5.30568600  | 0.58554400  | -0.87359700 |
| C | 4.21981000  | 1.09325600  | -1.60236300 |
| N | 1.27478500  | -0.04977100 | 0.28660700  |
| C | 0.85535900  | -0.71524900 | 1.36139500  |
| O | 1.48619200  | -1.26673600 | 2.29655400  |
| C | -0.72294200 | -0.79683100 | 1.45751300  |
| C | -1.30383900 | 0.57257100  | 1.66165000  |
| C | -1.73399900 | 1.53767400  | 0.71309700  |
| C | -2.32841500 | 2.75052700  | 1.17929700  |
| C | -2.79620000 | 3.72193600  | 0.30355000  |
| C | -2.68978100 | 3.53569800  | -1.08383300 |
| C | -2.09293000 | 2.36029600  | -1.56819600 |
| C | -1.62089100 | 1.38269900  | -0.70128300 |
| C | -1.39338300 | -1.65687500 | 0.38188800  |
| C | -2.79070800 | -1.81118200 | 0.39994900  |
| C | -3.44420100 | -2.64793600 | -0.50696000 |
| C | -2.70818900 | -3.35966800 | -1.46035800 |
| C | -1.31836900 | -3.21865200 | -1.48849700 |
| C | -0.66863800 | -2.37708600 | -0.57866900 |
| H | -1.34056900 | 0.89474900  | 2.70243200  |
| H | -0.87692800 | -1.33582400 | 2.40102700  |
| H | 3.54359900  | -0.96984300 | 1.61467600  |
| H | 5.86886700  | -0.56097000 | 0.86505700  |
| H | 6.32886200  | 0.76551900  | -1.19904400 |
| H | 4.39555800  | 1.67739300  | -2.50569600 |
| H | 2.07137600  | 1.25632900  | -1.74423900 |
| H | -2.41310600 | 2.90715300  | 2.25363300  |
| H | -3.24340000 | 4.63290600  | 0.69823900  |
| H | -3.05248500 | 4.29571100  | -1.77244700 |
| H | -1.98346200 | 2.21415300  | -2.64132800 |
| H | -1.11911400 | 0.50627600  | -1.09139600 |
| H | 0.40848300  | -2.25704900 | -0.62416900 |
| H | -0.73036300 | -3.76260900 | -2.22549300 |
| H | -3.21185100 | -4.01151100 | -2.17171000 |
| H | -4.52830600 | -2.74162100 | -0.47108700 |
| H | -3.37230000 | -1.25606400 | 1.13333800  |

#####  
#####



***t*-1a**

E (RB+HF - LYP) = -940,485595361 a.u.

|   |             |             |             |
|---|-------------|-------------|-------------|
| C | -1.21408100 | 2.15030700  | 1.01728300  |
| C | -0.42719600 | 1.77458600  | -0.08136200 |
| C | -0.10641500 | 2.73967300  | -1.04599900 |
| C | -0.55366400 | 4.05712400  | -0.91366900 |
| C | -1.33549500 | 4.42312800  | 0.18490200  |
| C | -1.66586000 | 3.46474000  | 1.14847900  |
| C | 0.12149600  | 0.37510500  | -0.21877600 |
| N | -0.69240100 | -0.72880500 | 0.34048200  |
| C | -1.95316900 | -1.22592500 | -0.03132700 |
| C | -2.50876100 | -2.32698600 | 0.64480100  |
| C | -3.75717300 | -2.81173200 | 0.25484500  |
| C | -4.46334000 | -2.21709800 | -0.79607900 |
| C | -3.90556400 | -1.12310700 | -1.46213400 |
| C | -2.65654600 | -0.62504100 | -1.08715500 |
| C | 1.26323700  | -0.05803700 | 0.78820600  |
| C | 0.29262900  | -1.18716500 | 1.19825000  |
| O | 0.33497000  | -2.13139000 | 1.95890300  |
| C | 2.61000800  | -0.43110800 | 0.22743300  |
| C | 2.76503100  | -1.53809100 | -0.62252000 |
| C | 4.01388800  | -1.85539000 | -1.15847500 |
| C | 5.13144700  | -1.07253800 | -0.85079600 |
| C | 4.99035900  | 0.02737600  | -0.00177700 |
| C | 3.73820700  | 0.34323000  | 0.53264300  |
| H | 0.40741300  | 0.17783800  | -1.25872900 |
| H | 1.37336900  | 0.67624400  | 1.59289400  |
| H | -1.95862500 | -2.78986000 | 1.45604000  |
| H | -4.17968000 | -3.66435600 | 0.78047500  |
| H | -5.43588500 | -2.60153000 | -1.09099100 |
| H | -4.44246100 | -0.64893900 | -2.27981000 |
| H | -2.23554600 | 0.23061500  | -1.60573200 |
| H | 1.90830100  | -2.16658100 | -0.85618300 |
| H | 4.11627500  | -2.71992800 | -1.80945100 |
| H | 6.10475200  | -1.32309400 | -1.26474000 |
| H | 5.85345900  | 0.63898600  | 0.24881300  |
| H | 3.63535000  | 1.19950300  | 1.19582700  |
| H | 0.49786500  | 2.45845700  | -1.90648900 |
| H | -0.29572000 | 4.79332800  | -1.67075300 |
| H | -1.69005600 | 5.44546400  | 0.28728300  |
| H | -2.28089100 | 3.73965800  | 2.00161900  |
| H | -1.48509700 | 1.40862700  | 1.76469600  |

#####  
#####

*t-1a*<sup>-</sup>

E (UB+HF - LYP) = -940,4795831 a.u.

|   |             |             |             |
|---|-------------|-------------|-------------|
| C | 3.54161800  | 0.45725500  | 0.08058900  |
| C | 2.57632500  | -0.56896800 | 0.26633100  |
| C | 2.91755300  | -1.87390600 | -0.14373600 |
| C | 4.16227500  | -2.15367900 | -0.70485100 |
| C | 5.11125200  | -1.12466200 | -0.89040700 |
| C | 4.78380900  | 0.17609000  | -0.49131200 |
| C | 1.23165300  | -0.20859200 | 0.78877700  |
| C | 0.21599200  | -1.29613100 | 1.10881400  |
| O | 0.21056200  | -2.30485500 | 1.80937300  |
| C | 0.08291500  | 0.36664700  | -0.22990500 |
| N | -0.77181500 | -0.73454600 | 0.32019800  |
| C | -2.04898100 | -1.16134700 | -0.04179300 |
| C | -2.54093100 | -2.41114400 | 0.40129200  |
| C | -3.80611600 | -2.83966600 | 0.00673600  |
| C | -4.60931100 | -2.05378700 | -0.83402200 |
| C | -4.12035900 | -0.81416600 | -1.26564900 |
| C | -2.86267800 | -0.35923100 | -0.87142800 |
| C | -0.37668300 | 1.76271300  | -0.06567600 |
| C | -0.84064600 | 2.25852100  | 1.19412200  |
| C | -1.13461800 | 3.61228400  | 1.35596800  |
| C | -0.98078100 | 4.52549900  | 0.30326900  |
| C | -0.51325800 | 4.04598100  | -0.94955600 |
| C | -0.21509400 | 2.69823000  | -1.11447400 |
| H | 0.35495700  | 0.15742100  | -1.27113000 |
| H | 1.30598400  | 0.53444400  | 1.60383300  |
| H | -1.92032800 | -3.01978000 | 1.04912500  |
| H | -4.16910400 | -3.80361700 | 0.35926800  |
| H | -5.59659000 | -2.39552200 | -1.13606000 |
| H | -4.73001700 | -0.18262800 | -1.90932100 |
| H | -2.50725500 | 0.61607300  | -1.18634100 |
| H | 2.20085200  | -2.67847000 | 0.00128500  |
| H | 4.40344700  | -3.17522400 | -0.99392000 |
| H | 6.08004200  | -1.33928200 | -1.33674700 |
| H | 5.50568100  | 0.98142900  | -0.62396700 |
| H | 3.30397300  | 1.47244900  | 0.39296500  |
| H | 0.15259600  | 2.34573200  | -2.07892100 |
| H | -0.39147300 | 4.73187600  | -1.78642600 |
| H | -1.21268000 | 5.57886700  | 0.44299500  |
| H | -1.49678200 | 3.96306400  | 2.32237100  |
| H | -1.00871600 | 1.56617100  | 2.01608700  |

#####  
#####

***t*-1a-TS(N-C2)**

E (UB+HF - LYP) = -940,454545412 a.u.

1 imaginary frequency -62,73 cm<sup>\*\*</sup>-1

|   |             |             |             |
|---|-------------|-------------|-------------|
| C | 1.80689800  | 1.82994700  | 0.92743500  |
| C | 0.91909000  | 1.63175100  | -0.13954000 |
| C | 0.87897900  | 2.59411500  | -1.15890800 |
| C | 1.69217900  | 3.73107000  | -1.11490300 |
| C | 2.56871700  | 3.92146400  | -0.04222700 |
| C | 2.62227600  | 2.96352800  | 0.97677700  |
| C | -0.01846400 | 0.41781200  | -0.17559300 |
| N | 0.43239800  | -0.77953300 | 0.48985800  |
| C | 1.49627900  | -1.49602000 | 0.06242200  |
| C | 1.87837400  | -2.66324600 | 0.80132200  |
| C | 2.93835800  | -3.46630100 | 0.40604700  |
| C | 3.68922500  | -3.17383500 | -0.74868200 |
| C | 3.33735200  | -2.03804400 | -1.48748700 |
| C | 2.28085500  | -1.21116500 | -1.10179000 |
| C | -1.31072500 | 0.68688600  | 0.65660500  |
| C | -0.85921000 | -0.04514100 | 1.97228500  |
| O | -1.51623300 | -0.75216400 | 2.69459900  |
| C | -2.58507700 | 0.15109700  | 0.05400500  |
| C | -2.67657600 | -1.17778900 | -0.40190100 |
| C | -3.86719000 | -1.66711100 | -0.93956200 |
| C | -5.00058800 | -0.84857500 | -1.02685800 |
| C | -4.92750900 | 0.46856700  | -0.56499500 |
| C | -3.73172200 | 0.95760800  | -0.02937200 |
| H | -0.28656600 | 0.25293200  | -1.23741900 |
| H | -1.44988600 | 1.74999500  | 0.89130000  |
| H | 1.30051700  | -2.90352400 | 1.69102000  |
| H | 3.18856500  | -4.34333200 | 1.00388100  |
| H | 4.51796100  | -3.80861900 | -1.05493900 |
| H | 3.90248800  | -1.78158000 | -2.38450200 |
| H | 2.05360200  | -0.33141600 | -1.69754800 |
| H | -1.79996400 | -1.81465000 | -0.31817900 |
| H | -3.91422700 | -2.69756700 | -1.28718400 |
| H | -5.92859500 | -1.23547100 | -1.44347900 |
| H | -5.79968700 | 1.11784100  | -0.62229600 |
| H | -3.68378700 | 1.98523000  | 0.32827200  |
| H | 0.20353400  | 2.44623500  | -2.00126100 |
| H | 1.64612400  | 4.46302900  | -1.91981100 |
| H | 3.20850100  | 4.80121900  | -0.00471900 |
| H | 3.30795600  | 3.09723300  | 1.81164900  |
| H | 1.84743800  | 1.07678200  | 1.70894100  |

#####  
#####

***t*-1a-TS(C2-C3)**

E (UB+HF - LYP) = -940,452625423 a.u.

1 imaginary frequency -135,21 cm<sup>\*\*</sup>-1

|   |             |             |             |
|---|-------------|-------------|-------------|
| C | 1.12757500  | 1.93577400  | -1.12833000 |
| C | 0.34596700  | 1.54983100  | -0.02784300 |
| C | -0.00212500 | 2.52841500  | 0.91573500  |
| C | 0.40727700  | 3.85530800  | 0.76451700  |
| C | 1.18017200  | 4.23071900  | -0.34039800 |
| C | 1.53692000  | 3.26247100  | -1.28451700 |
| C | -0.17974400 | 0.12804900  | 0.11948000  |
| N | 0.74385800  | -0.89732800 | -0.40746800 |
| C | 2.04380200  | -1.11905400 | 0.05171500  |
| C | 2.93733400  | -1.96035900 | -0.65669000 |
| C | 4.22024600  | -2.19786700 | -0.16768500 |
| C | 4.67071000  | -1.60466400 | 1.01923700  |
| C | 3.79501700  | -0.76904800 | 1.72074600  |
| C | 2.50173700  | -0.53175700 | 1.25505700  |
| C | -1.43199300 | -0.08468800 | -0.70879600 |
| C | -2.72332900 | -0.35183800 | -0.16037100 |
| C | -2.93664600 | -0.95708300 | 1.11836400  |
| C | -4.21440400 | -1.23735500 | 1.59307800  |
| C | -5.35757700 | -0.94947600 | 0.83078700  |
| C | -5.17522700 | -0.37682500 | -0.44254800 |
| C | -3.90470600 | -0.08761200 | -0.92152700 |
| C | -0.07941400 | -1.77677200 | -1.18175600 |
| O | 0.36576700  | -2.59374000 | -1.97381100 |
| H | -0.38820700 | -0.04628600 | 1.18451700  |
| H | -1.42766200 | 0.45480300  | -1.65557400 |
| H | 2.59683400  | -2.42410800 | -1.57407100 |
| H | 4.88265900  | -2.85390200 | -0.73058300 |
| H | 5.67870900  | -1.78667300 | 1.38525500  |
| H | 4.11866100  | -0.29202000 | 2.64455900  |
| H | 1.84710500  | 0.12401000  | 1.81910700  |
| H | -2.07913200 | -1.22651300 | 1.73054400  |
| H | -4.32322000 | -1.70037000 | 2.57400700  |
| H | -6.35329000 | -1.17168900 | 1.20800100  |
| H | -6.04217300 | -0.15011100 | -1.06318300 |
| H | -3.79258100 | 0.35920800  | -1.90884100 |
| H | -0.61106600 | 2.24469800  | 1.77246100  |
| H | 0.12390300  | 4.59602500  | 1.51000200  |
| H | 1.50411600  | 5.26251900  | -0.46038300 |
| H | 2.14422300  | 3.53947200  | -2.14436800 |
| H | 1.41842700  | 1.18513600  | -1.85820100 |

#####  
#####

***t*-1a-TS(C3-C4)**

E (UB+HF - LYP) = -940,479070267 a.u.

1 imaginary frequency -181,62 cm<sup>\*\*</sup>-1

|   |             |             |             |
|---|-------------|-------------|-------------|
| C | -1.31982500 | 2.12935800  | 0.98239300  |
| C | -0.53662800 | 1.75721900  | -0.15456700 |
| C | -0.16767100 | 2.80690500  | -1.04869600 |
| C | -0.56402900 | 4.11946000  | -0.83470400 |
| C | -1.34830200 | 4.46774200  | 0.28761600  |
| C | -1.71301900 | 3.44730600  | 1.18611000  |
| C | -0.00294800 | 0.42292500  | -0.33512900 |
| N | -0.70609500 | -0.72124600 | 0.26176800  |
| C | -1.97328600 | -1.22838500 | -0.05327500 |
| C | -2.44797000 | -2.41870100 | 0.53787600  |
| C | -3.70887100 | -2.90972100 | 0.19839700  |
| C | -4.52092700 | -2.24244500 | -0.72576700 |
| C | -4.04937900 | -1.06140700 | -1.30777100 |
| C | -2.79319000 | -0.55190500 | -0.97815400 |
| C | 0.31342600  | -1.26062600 | 1.03305600  |
| O | 0.32918500  | -2.30856600 | 1.66820400  |
| C | 1.34361800  | -0.17703400 | 0.80661300  |
| C | 2.67810800  | -0.48735000 | 0.32565500  |
| C | 2.96883900  | -1.65588400 | -0.44014700 |
| C | 4.22917300  | -1.86820100 | -0.98705900 |
| C | 5.26683400  | -0.93276600 | -0.81240900 |
| C | 4.99741700  | 0.23100100  | -0.06520500 |
| C | 3.74063100  | 0.45025800  | 0.48458500  |
| H | 0.35896900  | 0.20911100  | -1.34535000 |
| H | 1.32063600  | 0.59225600  | 1.58491900  |
| H | -1.81612600 | -2.94182900 | 1.24512700  |
| H | -4.05701900 | -3.83046100 | 0.66302400  |
| H | -5.50314200 | -2.63252100 | -0.98314600 |
| H | -4.66653400 | -0.52113900 | -2.02294400 |
| H | -2.44317000 | 0.37574700  | -1.41771800 |
| H | 2.19408600  | -2.40751500 | -0.57642100 |
| H | 4.41432100  | -2.77957700 | -1.55510900 |
| H | 6.25020600  | -1.10316200 | -1.24468700 |
| H | 5.78301100  | 0.97051700  | 0.08798200  |
| H | 3.55304400  | 1.35993800  | 1.05384900  |
| H | 0.44138400  | 2.56364400  | -1.91914200 |
| H | -0.26658000 | 4.88866300  | -1.54694300 |
| H | -1.65980700 | 5.49622600  | 0.45374000  |
| H | -2.31937400 | 3.68936600  | 2.05883200  |
| H | -1.62673400 | 1.36148400  | 1.68946600  |

#####  
#####

***t*-1a-TS(N-C4)**

E (UB+HF - LYP) = -940,475955448 a.u.

1 imaginary frequency -386,31 cm<sup>\*\*</sup>-1

|   |             |             |             |
|---|-------------|-------------|-------------|
| C | -0.45418500 | 2.48192900  | 1.22633800  |
| C | -0.26148800 | 1.84190100  | -0.04706900 |
| C | -0.55339800 | 2.62385800  | -1.20462900 |
| C | -0.95457600 | 3.94637700  | -1.11659000 |
| C | -1.10378200 | 4.57556000  | 0.15034100  |
| C | -0.85420600 | 3.81276000  | 1.30429700  |
| C | 0.17160600  | 0.46221400  | -0.16986700 |
| N | -0.81882200 | -0.76342800 | 0.44911500  |
| C | -2.05915600 | -1.26760300 | 0.08489400  |
| C | -2.28123500 | -2.65256500 | -0.10962600 |
| C | -3.52306600 | -3.10943400 | -0.54353400 |
| C | -4.56998300 | -2.21133100 | -0.81347300 |
| C | -4.35042100 | -0.83946200 | -0.62342000 |
| C | -3.12045800 | -0.36531000 | -0.17090500 |
| C | 1.21349300  | -0.17602500 | 0.80759700  |
| C | 0.22676300  | -1.30693900 | 1.12812900  |
| O | 0.33053500  | -2.35213100 | 1.77356600  |
| C | 2.56495900  | -0.51001100 | 0.22887700  |
| C | 3.04810100  | -1.82315000 | 0.14473000  |
| C | 4.30053800  | -2.08947100 | -0.42279500 |
| C | 5.08878300  | -1.04459500 | -0.91999500 |
| C | 4.61798600  | 0.26956100  | -0.83645100 |
| C | 3.37164300  | 0.53698500  | -0.26149600 |
| H | 0.35868000  | 0.17376400  | -1.20704600 |
| H | 1.34033000  | 0.47849000  | 1.68289400  |
| H | -1.47879800 | -3.34946600 | 0.11058500  |
| H | -3.68021400 | -4.17974300 | -0.67100300 |
| H | -5.53579100 | -2.57493800 | -1.15740900 |
| H | -5.15196300 | -0.12925200 | -0.82054700 |
| H | -2.95870500 | 0.69640900  | -0.01036800 |
| H | 2.44252700  | -2.63399200 | 0.53850800  |
| H | 4.65830400  | -3.11597100 | -0.47609800 |
| H | 6.06083000  | -1.25210100 | -1.36347700 |
| H | 5.22308400  | 1.09071500  | -1.21664400 |
| H | 3.00966600  | 1.56039100  | -0.19337300 |
| H | -0.44152600 | 2.16161000  | -2.18592900 |
| H | -1.15536100 | 4.50752200  | -2.02859000 |
| H | -1.42111600 | 5.61304400  | 0.22406700  |
| H | -0.98571500 | 4.26705300  | 2.28676100  |
| H | -0.30424900 | 1.91601200  | 2.14320100  |

#####  
#####

***t*-1a-IN(N-C2)**

E (UB+HF - LYP) = -940,4558007 a.u.

|   |             |             |             |
|---|-------------|-------------|-------------|
| C | -2.12647400 | -1.63727000 | 0.82789000  |
| C | -1.16770100 | -1.52870900 | -0.18742000 |
| C | -1.20483000 | -2.45730500 | -1.23853500 |
| C | -2.16127300 | -3.47647600 | -1.27317800 |
| C | -3.10772000 | -3.58006000 | -0.24829700 |
| C | -3.08605100 | -2.65341100 | 0.79961100  |
| C | -0.08665800 | -0.42961800 | -0.14784200 |
| N | -0.37900300 | 0.71807700  | 0.66151700  |
| C | -1.26479000 | 1.62887300  | 0.20265300  |
| C | -1.52275300 | 2.79051800  | 1.00905500  |
| C | -2.39188500 | 3.79405900  | 0.60915100  |
| C | -3.07421700 | 3.72615200  | -0.62205600 |
| C | -2.85162200 | 2.60289800  | -1.42738700 |
| C | -1.98680700 | 1.57797000  | -1.03883400 |
| C | 1.23709200  | -1.02189400 | 0.43580500  |
| C | 1.06077700  | -0.97700000 | 1.97312800  |
| O | 1.85931000  | -0.69273700 | 2.81316700  |
| C | 2.50402700  | -0.34702500 | -0.04704400 |
| C | 2.67366100  | 1.04584800  | 0.04229700  |
| C | 3.84894400  | 1.64625000  | -0.41260500 |
| C | 4.88405500  | 0.87287400  | -0.95151700 |
| C | 4.73111600  | -0.51387000 | -1.03278600 |
| C | 3.55064800  | -1.11373900 | -0.58270300 |
| H | 0.12785400  | -0.17772600 | -1.20868400 |
| H | 1.30419000  | -2.09341400 | 0.19901400  |
| H | -0.99857600 | 2.85703000  | 1.96082400  |
| H | -2.54570100 | 4.65311900  | 1.26372000  |
| H | -3.75594400 | 4.51549300  | -0.93192900 |
| H | -3.37288900 | 2.51364500  | -2.38189600 |
| H | -1.87032000 | 0.71838500  | -1.69297800 |
| H | 1.86046800  | 1.63289700  | 0.46002800  |
| H | 3.95850700  | 2.72681700  | -0.34347900 |
| H | 5.79981000  | 1.34601000  | -1.30092100 |
| H | 5.52682500  | -1.12974400 | -1.44831900 |
| H | 3.43808900  | -2.19491600 | -0.65235100 |
| H | -0.47772800 | -2.37378400 | -2.04667100 |
| H | -2.17315900 | -4.18299600 | -2.10184200 |
| H | -3.85874900 | -4.36764200 | -0.27165000 |
| H | -3.82453000 | -2.71867400 | 1.59685000  |
| H | -2.10483900 | -0.90351600 | 1.62799400  |

#####  
#####

***t*-1a-IN(C2-C3)**

E (UB+HF - LYP) = -940,455254169 a.u.

|   |             |             |             |
|---|-------------|-------------|-------------|
| C | 3.92521000  | 0.57120400  | 0.55568500  |
| C | 2.65274400  | 0.11670100  | 0.07798000  |
| C | 2.70264500  | -0.94343600 | -0.88465000 |
| C | 3.90962800  | -1.46909600 | -1.33562400 |
| C | 5.14098500  | -0.99408100 | -0.85776700 |
| C | 5.12194800  | 0.03419800  | 0.10323000  |
| C | 1.45032900  | 0.68968500  | 0.57232600  |
| C | 0.10427700  | 0.46860700  | -0.05933000 |
| N | -0.55728600 | -0.65008300 | 0.66933500  |
| C | 0.06997200  | -0.80662400 | 1.92738100  |
| O | -0.17424400 | -1.73038300 | 2.69084100  |
| C | -0.70593800 | 1.76166300  | -0.06894600 |
| C | -1.49497900 | 2.14734100  | 1.02412800  |
| C | -2.17785000 | 3.36798800  | 1.01839300  |
| C | -2.09156700 | 4.22326700  | -0.08382500 |
| C | -1.31107200 | 3.84522900  | -1.18330600 |
| C | -0.62741100 | 2.62780200  | -1.17101000 |
| C | -1.59617500 | -1.41446500 | 0.10881700  |
| C | -1.97434900 | -2.66849100 | 0.64663300  |
| C | -2.99475300 | -3.41290600 | 0.05686100  |
| C | -3.66907100 | -2.95464100 | -1.08130600 |
| C | -3.30231500 | -1.71804700 | -1.61789600 |
| C | -2.28970900 | -0.95379800 | -1.03474500 |
| H | 0.22129600  | 0.14410800  | -1.10341200 |
| H | 1.54128300  | 1.54230100  | 1.23782300  |
| H | -1.45780200 | -3.03613300 | 1.52297700  |
| H | -3.26070500 | -4.37363100 | 0.49493100  |
| H | -4.46053400 | -3.54621800 | -1.53623700 |
| H | -3.81175600 | -1.33163000 | -2.49919100 |
| H | -2.05007100 | 0.01294200  | -1.46176800 |
| H | 1.77451300  | -1.36787900 | -1.26045000 |
| H | 3.89107400  | -2.27658500 | -2.06778300 |
| H | 6.07984500  | -1.41508100 | -1.21047500 |
| H | 6.06096200  | 0.42070600  | 0.50010500  |
| H | 3.94044400  | 1.36804600  | 1.29839400  |
| H | -0.01269300 | 2.34351700  | -2.02373300 |
| H | -1.23505800 | 4.49931300  | -2.05007000 |
| H | -2.62762900 | 5.17020500  | -0.08969600 |
| H | -2.78357800 | 3.64846500  | 1.87819900  |
| H | -1.56993400 | 1.48258600  | 1.88013200  |

#####  
#####



***t*-1a-IN(C3-C4)**

E (UB+HF - LYP) = -940,506038993 a.u.

|   |             |             |             |
|---|-------------|-------------|-------------|
| C | 3.47384000  | -0.53017900 | 0.57417000  |
| C | 2.51648000  | -1.37431700 | -0.06646100 |
| C | 3.00536100  | -2.61064000 | -0.59034100 |
| C | 4.34329900  | -2.96650400 | -0.49916100 |
| C | 5.27117900  | -2.11220900 | 0.12329200  |
| C | 4.81159700  | -0.90040700 | 0.66149100  |
| C | 1.12195200  | -1.10150500 | -0.17514600 |
| N | 0.43103400  | 0.03696600  | 0.14354800  |
| C | 0.87949400  | 1.35431900  | -0.01584100 |
| C | 0.32744300  | 2.38809400  | 0.77310600  |
| C | 0.72732700  | 3.70894700  | 0.58422200  |
| C | 1.68597600  | 4.04328900  | -0.38159100 |
| C | 2.23288600  | 3.02264600  | -1.16709300 |
| C | 1.83801100  | 1.69641100  | -0.99467700 |
| C | -1.00122200 | -0.17109500 | 0.63732200  |
| O | -1.13032000 | -0.25175400 | 1.87667700  |
| C | -1.91960600 | -0.23867500 | -0.40262300 |
| C | -3.34162200 | -0.45717300 | -0.26619700 |
| C | -4.00073100 | -0.64202500 | 0.98061200  |
| C | -5.37828300 | -0.84906600 | 1.04519100  |
| C | -6.16818400 | -0.88239800 | -0.11240200 |
| C | -5.53826300 | -0.70227900 | -1.35201100 |
| C | -4.16281000 | -0.49587500 | -1.42585600 |
| H | 0.47119800  | -1.93530400 | -0.42714500 |
| H | -1.53761000 | -0.10541500 | -1.41167800 |
| H | -0.40381600 | 2.13244500  | 1.53255000  |
| H | 0.28677000  | 4.48690400  | 1.20496300  |
| H | 1.99695400  | 5.07622900  | -0.52047300 |
| H | 2.96949200  | 3.25939500  | -1.93298000 |
| H | 2.25538400  | 0.91771500  | -1.62435300 |
| H | -3.40169500 | -0.61773300 | 1.88450000  |
| H | -5.84555200 | -0.98694800 | 2.02020600  |
| H | -7.24275200 | -1.04362600 | -0.05133500 |
| H | -6.12611000 | -0.72258700 | -2.26955700 |
| H | -3.69415400 | -0.35703000 | -2.39978100 |
| H | 2.29944300  | -3.28516600 | -1.07204700 |
| H | 4.67303200  | -3.91847900 | -0.91236800 |
| H | 6.32055700  | -2.38860700 | 0.19354500  |
| H | 5.51042000  | -0.23470700 | 1.16575000  |
| H | 3.14901500  | 0.40205900  | 1.02191400  |

#####  
#####

***t*-1a-IN(N-C4)**

E (UB+HF - LYP) = -940,51487288 a.u.

|   |             |             |             |
|---|-------------|-------------|-------------|
| C | -3.08058500 | -1.71440300 | -1.47738600 |
| C | -2.46592100 | -1.09253600 | -0.34533700 |
| C | -2.86678400 | -1.57142800 | 0.94085000  |
| C | -3.81908400 | -2.57522700 | 1.07068900  |
| C | -4.41843200 | -3.15643100 | -0.05814700 |
| C | -4.03184200 | -2.71433500 | -1.33524300 |
| C | -1.51538400 | -0.06053400 | -0.53783100 |
| C | -0.81435400 | 0.70207300  | 0.53930200  |
| C | -0.64143400 | 2.17048400  | 0.17189100  |
| C | 0.17896600  | 2.57330100  | -0.89611100 |
| C | 0.31419800  | 3.92416000  | -1.22329600 |
| C | -0.36391800 | 4.90566600  | -0.49074500 |
| C | -1.17685000 | 4.51849400  | 0.57766600  |
| C | -1.31182200 | 3.16423600  | 0.90138600  |
| C | 0.56984300  | 0.01516000  | 0.90606600  |
| O | 0.78038100  | -0.16660100 | 2.12670700  |
| N | 1.29814900  | -0.27299700 | -0.17429000 |
| C | 2.55812900  | -0.84301400 | -0.08632500 |
| C | 3.20120900  | -1.13004900 | -1.32102400 |
| C | 4.47075200  | -1.69793600 | -1.38143100 |
| C | 5.16947100  | -2.00850000 | -0.20562900 |
| C | 4.55669900  | -1.73476300 | 1.02272100  |
| C | 3.28216000  | -1.16684300 | 1.09560600  |
| H | -1.22281500 | 0.15890200  | -1.56154900 |
| H | -1.39270500 | 0.66467300  | 1.46628300  |
| H | 2.82037100  | -0.96393000 | 2.05349500  |
| H | 5.08109500  | -1.96867900 | 1.94960300  |
| H | 6.16294900  | -2.45153100 | -0.24772400 |
| H | 4.92148000  | -1.90125700 | -2.35283200 |
| H | 2.65790700  | -0.89104100 | -2.23280500 |
| H | 0.73222000  | 1.80955800  | -1.43530100 |
| H | 0.96117900  | 4.21341600  | -2.04965200 |
| H | -0.25398100 | 5.95803500  | -0.74576600 |
| H | -1.70503000 | 5.26897000  | 1.16338700  |
| H | -1.94465400 | 2.87160000  | 1.73719700  |
| H | -2.78525700 | -1.38427700 | -2.47150500 |
| H | -4.47794600 | -3.16162600 | -2.22204600 |
| H | -5.16111800 | -3.94304700 | 0.05332400  |
| H | -4.09430900 | -2.92075800 | 2.06570600  |
| H | -2.39958100 | -1.16068900 | 1.83053800  |

#####  
#####

**c-1b**

E (RB+HF - LYP) = -826,12574919 a.u.

|   |             |             |             |
|---|-------------|-------------|-------------|
| C | 0.81961600  | 1.41020100  | 1.06358200  |
| C | 1.00945300  | 1.07529500  | -0.28428600 |
| C | 1.76272000  | 1.93781000  | -1.09330100 |
| C | 2.32987500  | 3.10052400  | -0.56632100 |
| C | 2.14125100  | 3.42227300  | 0.78068600  |
| C | 1.38141800  | 2.57491900  | 1.59223600  |
| C | 0.44953400  | -0.19413000 | -0.88359800 |
| N | -0.73648800 | -0.77681000 | -0.21997100 |
| C | -2.06429700 | -0.32244600 | -0.15023700 |
| C | -3.05292300 | -1.11190500 | 0.46472000  |
| C | -4.36806900 | -0.64965600 | 0.51244200  |
| C | -4.71644800 | 0.58729600  | -0.04005800 |
| C | -3.72893000 | 1.36715200  | -0.64695600 |
| C | -2.40737700 | 0.92106200  | -0.70453300 |
| C | 1.18961200  | -1.56558100 | -0.58919900 |
| C | -0.13598900 | -1.99364800 | 0.06824000  |
| O | -0.55328100 | -2.99574300 | 0.61186000  |
| C | 2.44110200  | -1.59094200 | 0.24751300  |
| H | 0.27779600  | -0.04885700 | -1.95806600 |
| H | 1.34835500  | -2.12762800 | -1.51851400 |
| H | -2.78253400 | -2.07208900 | 0.88886000  |
| H | -5.12712700 | -1.26655700 | 0.98691500  |
| H | -5.74368900 | 0.93877600  | 0.00347300  |
| H | -3.98278400 | 2.33216300  | -1.07833200 |
| H | -1.64537800 | 1.53972400  | -1.16806800 |
| H | 1.90658800  | 1.69765100  | -2.14534300 |
| H | 2.91176800  | 3.75674100  | -1.20869500 |
| H | 2.57550500  | 4.32973400  | 1.19225100  |
| H | 1.21935300  | 2.82272100  | 2.63823800  |
| H | 0.21814200  | 0.76480800  | 1.69836300  |
| C | 3.29390200  | -2.83927500 | 0.26758500  |
| C | 3.80065800  | -1.59412200 | -0.41890600 |
| H | 2.37458700  | -1.04743200 | 1.18719600  |
| H | 3.83540600  | -1.58873500 | -1.50629700 |
| H | 4.59988300  | -1.02818900 | 0.05220600  |
| H | 3.74297200  | -3.13041800 | 1.21321300  |
| H | 2.98216900  | -3.67775600 | -0.35014000 |

#####  
#####

*c-1b<sup>-</sup>*

E (UB+HF - LYP) = -826,11301126 a.u.

|   |             |             |             |
|---|-------------|-------------|-------------|
| C | -2.43485600 | 0.93428100  | -0.72366900 |
| C | -2.08001700 | -0.31460700 | -0.15249700 |
| C | -3.10627500 | -1.11105000 | 0.43290500  |
| C | -4.42681200 | -0.67682500 | 0.39394400  |
| C | -4.78647400 | 0.54223300  | -0.20730200 |
| C | -3.76292300 | 1.34356300  | -0.75434400 |
| N | -0.76036500 | -0.74167100 | -0.13902800 |
| C | -0.11483000 | -1.90507600 | 0.28437700  |
| O | -0.52249800 | -2.88557300 | 0.91164800  |
| C | 0.43378400  | -0.20024100 | -0.82061900 |
| C | 1.15390700  | -1.56448500 | -0.49389900 |
| C | 2.49626500  | -1.57100400 | 0.19527500  |
| C | 3.77004800  | -1.70672100 | -0.61023300 |
| C | 3.29699800  | -2.85109400 | 0.25700200  |
| C | 1.01786700  | 1.06327700  | -0.25273900 |
| C | 0.60250600  | 1.61449100  | 0.96613700  |
| C | 1.18292400  | 2.78440000  | 1.46762300  |
| C | 2.22520000  | 3.41914000  | 0.75480300  |
| C | 2.63448500  | 2.88702800  | -0.46936700 |
| C | 2.03607100  | 1.73024300  | -0.98285700 |
| H | 0.26262100  | -0.08246500 | -1.90783700 |
| H | 1.21997200  | -2.19612700 | -1.41005500 |
| H | -2.83826100 | -2.05520900 | 0.89396000  |
| H | -5.19660800 | -1.30615200 | 0.83978900  |
| H | -5.82339600 | 0.86849700  | -0.23211300 |
| H | -4.00717400 | 2.30180900  | -1.21033500 |
| H | -1.66093800 | 1.57308000  | -1.13972700 |
| H | 2.36289100  | 1.32520100  | -1.93913400 |
| H | 3.42735700  | 3.37542700  | -1.03551900 |
| H | 2.69434700  | 4.31880000  | 1.14864700  |
| H | 0.83696600  | 3.19417500  | 2.41424700  |
| H | -0.19318700 | 1.12671200  | 1.52337600  |
| H | 2.55853900  | -0.92822800 | 1.07001500  |
| H | 3.67366600  | -1.81258800 | -1.68982200 |
| H | 4.63786800  | -1.13360700 | -0.29171400 |
| H | 3.84166500  | -3.07068600 | 1.17291700  |
| H | 2.87901100  | -3.72767900 | -0.23391000 |

#####  
#####

**c-1b-TS(N-C2)**

E (UB+HF - LYP) = -826,09123891 a.u.

1 imaginary frequency -71,82 cm<sup>\*\*</sup>-1

|   |             |             |             |
|---|-------------|-------------|-------------|
| C | 0.49831200  | 1.38171300  | 1.24816400  |
| C | 0.70323300  | 1.06449100  | -0.10313100 |
| C | 1.25414100  | 2.04675100  | -0.93776400 |
| C | 1.60610600  | 3.30713700  | -0.44304300 |
| C | 1.40599900  | 3.60776900  | 0.90748300  |
| C | 0.84801400  | 2.63797900  | 1.74914000  |
| C | 0.35037900  | -0.32445500 | -0.64615300 |
| N | -0.76159800 | -0.98942500 | -0.01381300 |
| C | -2.04340500 | -0.59298500 | -0.15005500 |
| C | -3.07124500 | -1.33500600 | 0.52053600  |
| C | -4.41193600 | -0.99963000 | 0.40199200  |
| C | -4.83097300 | 0.08828400  | -0.38856100 |
| C | -3.84619300 | 0.83141300  | -1.05069700 |
| C | -2.49089800 | 0.51694400  | -0.93933100 |
| C | 1.41919700  | -1.41610300 | -0.33366600 |
| C | 0.74087700  | -2.02937200 | 0.91726900  |
| O | 0.67320800  | -3.20655800 | 1.20393600  |
| C | 2.86234100  | -1.01902100 | -0.11069100 |
| H | 0.23222200  | -0.21870900 | -1.74235100 |
| H | 1.37815200  | -2.16954500 | -1.13938700 |
| H | -2.76134100 | -2.18344200 | 1.12626800  |
| H | -5.15422100 | -1.59758900 | 0.93208500  |
| H | -5.88441300 | 0.34521800  | -0.47768600 |
| H | -4.13663500 | 1.68476400  | -1.66528500 |
| H | -1.75972800 | 1.13264400  | -1.45585600 |
| H | 1.40527500  | 1.82097700  | -1.99307800 |
| H | 2.02925300  | 4.05438800  | -1.11278000 |
| H | 1.67203700  | 4.58846800  | 1.29781700  |
| H | 0.67802900  | 2.86485400  | 2.80028200  |
| H | 0.05474900  | 0.62601200  | 1.89024000  |
| C | 3.95354800  | -2.05834600 | -0.22174800 |
| C | 3.83501400  | -0.97286800 | -1.26999000 |
| H | 3.01102500  | -0.26257900 | 0.65707300  |
| H | 3.46311200  | -1.25278500 | -2.25392500 |
| H | 4.58253900  | -0.18206000 | -1.28568400 |
| H | 4.78357200  | -2.01101200 | 0.48023400  |
| H | 3.65683600  | -3.06934400 | -0.49129200 |

#####  
#####

**c-1b-TS(C3-C4)**

E (UB+HF - LYP) = -826,09548299 a.u.

1 imaginary frequency -371,38 cm<sup>\*\*</sup>-1

|   |             |             |             |
|---|-------------|-------------|-------------|
| C | 1.81160400  | 1.98860700  | -1.22568300 |
| C | 0.98292200  | 1.13357200  | -0.42095300 |
| C | 0.87227200  | 1.49066000  | 0.96656100  |
| C | 1.53219600  | 2.59550600  | 1.48597600  |
| C | 2.35039600  | 3.41585000  | 0.67879800  |
| C | 2.46860400  | 3.08520200  | -0.69180100 |
| C | 0.39840200  | -0.04186100 | -0.99343200 |
| N | -0.70087400 | -0.73682800 | -0.32318700 |
| C | -0.23368200 | -2.05139100 | -0.25783600 |
| C | 1.18125700  | -1.87630200 | -0.68547100 |
| C | 2.27000500  | -1.72842400 | 0.32461300  |
| C | 3.05539700  | -2.92561900 | 0.84654000  |
| C | 3.71213700  | -1.92548400 | -0.08229500 |
| C | -2.00276000 | -0.25246400 | -0.13389200 |
| C | -2.31197600 | 1.08964800  | -0.44719300 |
| C | -3.61077800 | 1.57170300  | -0.28192600 |
| C | -4.62857900 | 0.74982500  | 0.21298200  |
| C | -4.31832300 | -0.57637800 | 0.54193900  |
| C | -3.02933000 | -1.08115000 | 0.37304400  |
| O | -0.88812200 | -3.07144800 | -0.02490100 |
| H | 0.28871000  | -0.02503200 | -2.08074500 |
| H | 1.45508000  | -2.56412500 | -1.50014400 |
| H | -2.80011100 | -2.11257400 | 0.60886400  |
| H | -5.09295800 | -1.23522000 | 0.93137300  |
| H | -5.63724200 | 1.13462000  | 0.34778400  |
| H | -3.82170800 | 2.60966500  | -0.53354000 |
| H | -1.52590400 | 1.74408700  | -0.80621700 |
| H | 1.92332500  | 1.75850600  | -2.28576400 |
| H | 3.08497000  | 3.70434000  | -1.34453100 |
| H | 2.86518900  | 4.27880700  | 1.09448700  |
| H | 1.40798900  | 2.83402500  | 2.54275900  |
| H | 0.23996900  | 0.88952900  | 1.61677600  |
| H | 2.10810700  | -0.93726700 | 1.05435200  |
| H | 3.90424700  | -2.23472600 | -1.10856600 |
| H | 4.46020500  | -1.24708400 | 0.32247700  |
| H | 3.35472000  | -2.93278000 | 1.89452100  |
| H | 2.79792800  | -3.90438200 | 0.44782100  |

#####  
#####

**c-1b-TS(N-C4)**

E (UB+HF - LYP) = -826,10879020 a.u.

1 imaginary frequency -320,04 cm<sup>\*\*</sup>-1

|   |             |             |             |
|---|-------------|-------------|-------------|
| C | 2.35759300  | 1.02514600  | -0.38005000 |
| C | 2.08941200  | -0.32803500 | -0.04559800 |
| C | 3.17780700  | -1.17621000 | 0.27888300  |
| C | 4.47951800  | -0.68532900 | 0.27016600  |
| C | 4.74216100  | 0.66356300  | -0.04091700 |
| C | 3.66656800  | 1.50363400  | -0.36503400 |
| N | 0.77149900  | -0.75661800 | 0.02845100  |
| C | 0.20004300  | -1.98145800 | -0.14088100 |
| O | 0.63649800  | -3.03449300 | -0.60656800 |
| C | -0.58698900 | -0.19064200 | 0.85825500  |
| C | -1.14043500 | -1.61399800 | 0.51895300  |
| C | -2.39368300 | -1.76374200 | -0.31041000 |
| C | -3.74332000 | -1.84392000 | 0.36286200  |
| C | -3.14844300 | -3.07320100 | -0.29015100 |
| C | -1.15553000 | 1.07157100  | 0.39665000  |
| C | -1.46333600 | 1.34331200  | -0.98080600 |
| C | -1.98563700 | 2.57277600  | -1.36989500 |
| C | -2.22202200 | 3.60158400  | -0.44088300 |
| C | -1.86964500 | 3.37030300  | 0.91682200  |
| C | -1.34888800 | 2.14820900  | 1.31114200  |
| H | -0.30404500 | -0.12606900 | 1.91448700  |
| H | -1.27023800 | -2.19671000 | 1.44499400  |
| H | 2.98113900  | -2.22023100 | 0.50479800  |
| H | 5.30383900  | -1.35861800 | 0.50318600  |
| H | 5.76145300  | 1.04375900  | -0.03810500 |
| H | 3.85161800  | 2.54659200  | -0.61906800 |
| H | 1.52930600  | 1.67522800  | -0.64661900 |
| H | -1.08624400 | 1.99234700  | 2.35831400  |
| H | -2.00918000 | 4.15751600  | 1.65706100  |
| H | -2.63896300 | 4.55528900  | -0.75609400 |
| H | -2.20688900 | 2.74076200  | -2.42451300 |
| H | -1.25112300 | 0.59161200  | -1.73662600 |
| H | -2.38242900 | -1.24458500 | -1.26475800 |
| H | -3.76599900 | -1.79923300 | 1.44995300  |
| H | -4.58543200 | -1.35101500 | -0.11751800 |
| H | -3.58295100 | -3.43024700 | -1.22142700 |
| H | -2.76737700 | -3.86551600 | 0.35067900  |

#####  
#####

**c-1b-IN(N-C2)**

E (UB+HF - LYP) = -826,09340132 a.u.

|   |             |             |             |
|---|-------------|-------------|-------------|
| C | -2.47805000 | 0.20462800  | -1.01261900 |
| C | -2.06316100 | -0.73051200 | -0.00033000 |
| C | -3.14020600 | -1.39705300 | 0.68332000  |
| C | -4.47183000 | -1.16965300 | 0.37426500  |
| C | -4.84839900 | -0.26097900 | -0.63649900 |
| C | -3.82542700 | 0.41423500  | -1.31320900 |
| N | -0.79887100 | -1.04226500 | 0.34587500  |
| C | 0.28605600  | -0.41505200 | -0.35633200 |
| C | 1.50256200  | -1.34391600 | -0.07947600 |
| C | 2.87337300  | -0.84310100 | -0.50621500 |
| C | 3.34399200  | -1.06384900 | -1.92664100 |
| C | 3.98725300  | -1.82447500 | -0.78722000 |
| C | 0.57008000  | 1.04564100  | 0.03790200  |
| C | 0.34840400  | 1.48888800  | 1.35037100  |
| C | 0.61844300  | 2.80966000  | 1.71713000  |
| C | 1.10691300  | 3.72229800  | 0.77485400  |
| C | 1.31769800  | 3.29857100  | -0.54056500 |
| C | 1.04960100  | 1.97290600  | -0.89887500 |
| C | 1.53069500  | -1.66062200 | 1.42435300  |
| O | 1.82538100  | -2.69857200 | 1.93980400  |
| H | 0.15401400  | -0.41223600 | -1.46043900 |
| H | 1.29148800  | -2.29764300 | -0.58680700 |
| H | -2.86406500 | -2.10713500 | 1.46079500  |
| H | -5.24248100 | -1.70962600 | 0.92685100  |
| H | -5.89537300 | -0.08462300 | -0.87490200 |
| H | -4.08066900 | 1.13541600  | -2.09190500 |
| H | -1.72974100 | 0.77886400  | -1.55199100 |
| H | 1.20616100  | 1.65176400  | -1.92834100 |
| H | 1.68156400  | 4.00054000  | -1.28964600 |
| H | 1.30790600  | 4.75368800  | 1.05941400  |
| H | 0.43743300  | 3.13212000  | 2.74120600  |
| H | -0.05642600 | 0.77935100  | 2.06574600  |
| H | 3.17442400  | 0.09812500  | -0.05175900 |
| H | 2.68451800  | -1.61011300 | -2.59769300 |
| H | 3.91222700  | -0.27096700 | -2.40887300 |
| H | 4.99865700  | -1.55517300 | -0.49008700 |
| H | 3.76141300  | -2.88360900 | -0.68641700 |

#####  
#####



**c-1b-IN(C3-C4)**

E (UB+HF - LYP) = -826,12711379 a.u.

|   |             |             |             |
|---|-------------|-------------|-------------|
| C | 2.61218200  | -1.79208500 | -0.25236500 |
| C | 2.08467400  | -0.50296800 | -0.00865200 |
| C | 2.99846500  | 0.55486100  | 0.21491000  |
| C | 4.36940700  | 0.32701100  | 0.16538000  |
| C | 4.88707100  | -0.94895800 | -0.10598300 |
| C | 3.99162000  | -2.00255200 | -0.30913400 |
| N | 0.70987200  | -0.26728400 | -0.00007800 |
| C | 0.20413800  | 1.03798600  | 0.59549500  |
| O | 0.41430100  | 1.20336100  | 1.82668200  |
| C | -0.14742200 | -1.13868300 | -0.62866000 |
| C | -1.48753000 | -1.43946100 | -0.25345000 |
| C | -2.09178600 | -1.02075000 | 0.97084300  |
| C | -3.39416900 | -1.39115300 | 1.28164800  |
| C | -4.15990200 | -2.18516700 | 0.41040700  |
| C | -3.58138500 | -2.61048700 | -0.79627800 |
| C | -2.27963400 | -2.24802500 | -1.12157700 |
| C | -0.39229100 | 1.85427000  | -0.33877100 |
| C | -0.97620100 | 3.16304900  | 0.03436500  |
| C | -2.27364300 | 3.66628400  | -0.58510500 |
| C | -0.96318100 | 4.34710000  | -0.92027900 |
| H | 0.26684900  | -1.67599000 | -1.48202000 |
| H | -0.46851700 | 1.52271900  | -1.37167800 |
| H | 2.61195900  | 1.54387800  | 0.43151800  |
| H | 5.04761500  | 1.16059800  | 0.34037900  |
| H | 5.96125700  | -1.11652300 | -0.14394900 |
| H | 4.36552700  | -3.00810000 | -0.49675100 |
| H | 1.93518600  | -2.63358500 | -0.36148300 |
| H | -1.84751700 | -2.58028500 | -2.06485000 |
| H | -4.15443400 | -3.22750000 | -1.48733300 |
| H | -5.17988100 | -2.46446600 | 0.66540100  |
| H | -3.82509200 | -1.05647300 | 2.22409200  |
| H | -1.51868500 | -0.41251100 | 1.66396700  |
| H | -0.83836600 | 3.40914800  | 1.08544900  |
| H | -2.73470600 | 3.03936500  | -1.34633500 |
| H | -2.98754500 | 4.19551100  | 0.04598300  |
| H | -0.77891900 | 5.34486200  | -0.52155300 |
| H | -0.54071700 | 4.18183300  | -1.91050200 |

#####  
#####

**c-1b-IN(N-C4)**

E (UB+HF - LYP) = -826,15458048 a.u.

|   |             |             |             |
|---|-------------|-------------|-------------|
| C | 3.27192700  | -1.15481000 | -1.41635200 |
| C | 2.54808900  | -0.45878000 | -0.39779400 |
| C | 2.89280100  | -0.76536100 | 0.95586300  |
| C | 3.89853000  | -1.67775800 | 1.25129600  |
| C | 4.60826000  | -2.33139600 | 0.23078200  |
| C | 4.27674000  | -2.06100600 | -1.10822300 |
| C | 1.54914200  | 0.48134400  | -0.75032300 |
| C | 0.75044700  | 1.31658700  | 0.19447700  |
| C | 0.37416000  | 2.65703500  | -0.42474700 |
| C | 0.11124700  | 3.84968900  | 0.45735500  |
| C | 1.35191900  | 3.81104800  | -0.41602000 |
| C | -0.53756200 | 0.52962600  | 0.65474600  |
| O | -0.58999700 | 0.20523500  | 1.86622600  |
| N | -1.38423000 | 0.31790200  | -0.35607500 |
| C | -2.59533000 | -0.32919400 | -0.18798300 |
| C | -3.38882300 | -0.48643600 | -1.35797500 |
| C | -4.63087700 | -1.11447800 | -1.33336300 |
| C | -5.15189600 | -1.61951200 | -0.13257800 |
| C | -4.39014600 | -1.47549300 | 1.03322900  |
| C | -3.14154200 | -0.84852700 | 1.02079900  |
| H | 1.28961700  | 0.55728400  | -1.80497800 |
| H | 1.31856500  | 1.50409200  | 1.11325600  |
| H | -2.56253400 | -0.74696600 | 1.92992600  |
| H | -4.77483000 | -1.86082900 | 1.97809100  |
| H | -6.12321500 | -2.11067200 | -0.10850400 |
| H | -5.20073800 | -1.21220800 | -2.25763000 |
| H | -2.98420000 | -0.09464600 | -2.28875600 |
| H | 3.01965500  | -0.95782700 | -2.45681600 |
| H | 4.80788900  | -2.56888600 | -1.91179500 |
| H | 5.39278300  | -3.04497100 | 0.47239400  |
| H | 4.12858800  | -1.89569900 | 2.29287800  |
| H | 2.33072100  | -0.30327700 | 1.76152900  |
| H | -0.26639200 | 2.55869600  | -1.29834500 |
| H | 2.31323400  | 3.65702200  | 0.07141900  |
| H | 1.39645300  | 4.46811900  | -1.28336100 |
| H | -0.69479600 | 4.52774700  | 0.18380100  |
| H | 0.23625300  | 3.72037000  | 1.53049400  |

#####  
#####

***t-1b***

E (RB+HF - LYP) = -826,12775306 a.u.

|   |             |             |             |
|---|-------------|-------------|-------------|
| C | 0.57811300  | 1.80374300  | 1.17650800  |
| C | 0.93385100  | 1.31054400  | -0.08737800 |
| C | 1.60535900  | 2.15803400  | -0.97925900 |
| C | 1.92913000  | 3.46779100  | -0.61434400 |
| C | 1.57485800  | 3.94924900  | 0.64843300  |
| C | 0.89562800  | 3.11364700  | 1.54093400  |
| C | 0.65409500  | -0.11975400 | -0.48471900 |
| N | -0.55542000 | -0.75447100 | 0.08871400  |
| C | -1.91995500 | -0.48420600 | -0.10670800 |
| C | -2.89616400 | -1.27997800 | 0.51984000  |
| C | -4.24649900 | -1.00242600 | 0.30803400  |
| C | -4.64257300 | 0.05646700  | -0.51574900 |
| C | -3.66756500 | 0.84364700  | -1.13334300 |
| C | -2.31105900 | 0.58048200  | -0.93397000 |
| C | 1.49227900  | -1.25015100 | 0.22527900  |
| C | 0.12939100  | -1.79736800 | 0.69360200  |
| O | -0.25128100 | -2.76339600 | 1.32285500  |
| C | 2.33068500  | -2.15429900 | -0.64096800 |
| H | 0.68108300  | -0.22084300 | -1.57720300 |
| H | 2.08094700  | -0.85517300 | 1.06169700  |
| H | -2.58788900 | -2.10328800 | 1.15392200  |
| H | -4.99530100 | -1.62335300 | 0.79343300  |
| H | -5.69723200 | 0.26525200  | -0.67314400 |
| H | -3.95893000 | 1.67170600  | -1.77460500 |
| H | -1.56114000 | 1.20401200  | -1.41051400 |
| H | 1.87779600  | 1.78959300  | -1.96667700 |
| H | 2.45099800  | 4.11121400  | -1.31823900 |
| H | 1.81963400  | 4.96919600  | 0.93337100  |
| H | 0.60798300  | 3.48390300  | 2.52171500  |
| H | 0.03889000  | 1.16506600  | 1.87181900  |
| C | 3.40664900  | -3.01289800 | -0.01872800 |
| C | 3.79245200  | -1.83706600 | -0.88364800 |
| H | 1.79170900  | -2.60036800 | -1.47645200 |
| H | 4.20062000  | -2.03299300 | -1.87184400 |
| H | 4.21012600  | -0.95911000 | -0.39623200 |
| H | 3.56022600  | -2.93319800 | 1.05457600  |
| H | 3.54660300  | -4.01590400 | -0.41235900 |

#####  
#####

*t-1b*<sup>-</sup>

E (UB+HF - LYP) = -826,11241438 a.u.

|   |             |             |             |
|---|-------------|-------------|-------------|
| C | -2.29559600 | 0.59614700  | -1.03888300 |
| C | -1.91909200 | -0.39480300 | -0.09809100 |
| C | -2.94743000 | -1.10525100 | 0.59359800  |
| C | -4.28278200 | -0.82986600 | 0.31397000  |
| C | -4.65918100 | 0.13713900  | -0.63241000 |
| C | -3.63603100 | 0.85108200  | -1.30154200 |
| N | -0.58297700 | -0.67965800 | 0.14194800  |
| C | 0.10354500  | -1.64482700 | 0.88066600  |
| O | -0.28266500 | -2.51992600 | 1.66355500  |
| C | 0.63943900  | -0.12592800 | -0.47063600 |
| C | 1.45055300  | -1.25491200 | 0.26413700  |
| C | 2.10655200  | -2.31588000 | -0.60104000 |
| C | 3.54579200  | -2.15973400 | -1.04146500 |
| C | 3.17303900  | -3.20976500 | -0.01833000 |
| C | 0.99557000  | 1.29069600  | -0.10450500 |
| C | 0.40255900  | 1.95199400  | 0.97018300  |
| C | 0.80053700  | 3.25427600  | 1.32838500  |
| C | 1.82693300  | 3.89613900  | 0.59821900  |
| C | 2.43282100  | 3.23899000  | -0.46827400 |
| C | 2.02709000  | 1.93845800  | -0.83239700 |
| H | 0.64248400  | -0.25205900 | -1.56675800 |
| H | 2.19420300  | -0.84773200 | 0.96732800  |
| H | -2.66814400 | -1.85834200 | 1.32206600  |
| H | -5.05202400 | -1.38592200 | 0.84990600  |
| H | -5.70738100 | 0.34235900  | -0.83604700 |
| H | -3.89347100 | 1.61826600  | -2.03020200 |
| H | -1.52597200 | 1.17050400  | -1.54810500 |
| H | 2.48962700  | 1.43515900  | -1.67973000 |
| H | 3.22657200  | 3.73101300  | -1.02953500 |
| H | 2.14147400  | 4.90320400  | 0.86831300  |
| H | 0.31542300  | 3.76072700  | 2.15956100  |
| H | -0.38836300 | 1.45573700  | 1.52647000  |
| H | 1.43420800  | -2.78528300 | -1.31950500 |
| H | 3.81945700  | -2.48489800 | -2.04324200 |
| H | 4.08047500  | -1.27582300 | -0.69580200 |
| H | 3.45764700  | -3.03712500 | 1.01816000  |
| H | 3.19003300  | -4.25650200 | -0.31445700 |

#####  
#####

***t*-1b-TS(N-C2)**

E (UB+HF - LYP) = -826,09149440 a.u.

1 imaginary frequency -85,34 cm<sup>\*\*</sup>-1

|   |             |             |             |
|---|-------------|-------------|-------------|
| C | -2.30458200 | 0.00284000  | -1.02682200 |
| C | -1.70193000 | -0.86856700 | -0.06191300 |
| C | -2.59306700 | -1.76635900 | 0.61252100  |
| C | -3.95266100 | -1.78974900 | 0.33784000  |
| C | -4.52344400 | -0.93264000 | -0.62308400 |
| C | -3.67375700 | -0.04441200 | -1.29367500 |
| N | -0.38539300 | -0.91644100 | 0.23146700  |
| C | 0.60370000  | -0.05946800 | -0.37906200 |
| C | 1.85647800  | -0.72953600 | 0.25481700  |
| C | 2.49353500  | -1.77191200 | -0.64449100 |
| C | 3.59527100  | -1.39073900 | -1.61300200 |
| C | 3.90160800  | -2.24531300 | -0.39889700 |
| C | 0.52265400  | 1.43616400  | -0.05662500 |
| C | 0.06528200  | 1.88098000  | 1.19290600  |
| C | 0.03780000  | 3.24302500  | 1.50112800  |
| C | 0.46396800  | 4.19211600  | 0.56430100  |
| C | 0.91412100  | 3.76213900  | -0.68744700 |
| C | 0.93892100  | 2.39641100  | -0.98991600 |
| C | 1.13793700  | -1.33524000 | 1.49605600  |
| O | 1.32184200  | -2.43089600 | 1.98871800  |
| H | 0.63707900  | -0.15244900 | -1.48220700 |
| H | -2.16192900 | -2.43928200 | 1.35007700  |
| H | -4.58834000 | -2.49199700 | 0.87840000  |
| H | -5.59035700 | -0.95768200 | -0.83468800 |
| H | -4.08575300 | 0.63657300  | -2.03974000 |
| H | -1.68438800 | 0.71912500  | -1.55859900 |
| H | 1.28166900  | 2.06803100  | -1.97102700 |
| H | 1.23861800  | 4.48870000  | -1.43097200 |
| H | 0.43658800  | 5.25352200  | 0.80405900  |
| H | -0.32400200 | 3.56706200  | 2.47546400  |
| H | -0.27074200 | 1.13767300  | 1.91047100  |
| H | 3.61174300  | -1.85931200 | -2.59563300 |
| H | 3.94006400  | -0.35783200 | -1.61034000 |
| H | 4.45178500  | -1.78855800 | 0.42156700  |
| H | 4.12557500  | -3.29971200 | -0.54641100 |
| H | 2.62411900  | -0.01131800 | 0.58006800  |
| H | 1.79028900  | -2.52873800 | -0.98831400 |

#####  
#####

***t*-1b-TS(C3-C4)**

E (UB+HF - LYP) = -826,10011038 a.u.

1 imaginary frequency -337,49 cm<sup>\*\*</sup>-1

|   |             |             |             |
|---|-------------|-------------|-------------|
| C | -2.42492300 | 0.73841000  | -0.63642100 |
| C | -1.95142600 | -0.47457900 | -0.08505400 |
| C | -2.89740100 | -1.41394300 | 0.38977900  |
| C | -4.26120300 | -1.14092100 | 0.30288100  |
| C | -4.73035800 | 0.05625000  | -0.25730700 |
| C | -3.79484400 | 0.98580700  | -0.72475700 |
| N | -0.58168400 | -0.72932800 | -0.00781200 |
| C | 0.09810800  | -1.90729400 | 0.34498400  |
| O | -0.38044900 | -3.02724700 | 0.56672500  |
| C | 0.50542300  | 0.02866800  | -0.63036000 |
| C | 0.80148800  | 1.37671100  | -0.22638300 |
| C | 0.53555300  | 1.87031000  | 1.09465100  |
| C | 0.96275500  | 3.13057200  | 1.49348700  |
| C | 1.68887800  | 3.97257500  | 0.62620600  |
| C | 1.98340200  | 3.49224400  | -0.67272500 |
| C | 1.55829600  | 2.23876600  | -1.08482300 |
| C | 1.48642400  | -1.43425400 | 0.19984100  |
| C | 2.51435100  | -2.35792300 | -0.36054700 |
| C | 3.88559000  | -1.82755100 | -0.73894900 |
| C | 3.74950200  | -2.76465700 | 0.43689700  |
| H | 0.58533900  | -0.16068300 | -1.70444500 |
| H | 1.85969900  | -0.81862600 | 1.02470000  |
| H | -2.54164600 | -2.35088000 | 0.80049000  |
| H | -4.96912800 | -1.88093600 | 0.67342200  |
| H | -5.79700700 | 0.26095200  | -0.31984900 |
| H | -4.13126800 | 1.92766900  | -1.15525900 |
| H | -1.71077000 | 1.47994900  | -0.97668600 |
| H | 1.79532100  | 1.89535600  | -2.09245200 |
| H | 2.54530900  | 4.11851300  | -1.36604100 |
| H | 2.01707600  | 4.95858500  | 0.94660400  |
| H | 0.72284600  | 3.47479800  | 2.49992500  |
| H | -0.03635200 | 1.25152400  | 1.78321400  |
| H | 2.11502300  | -3.13540200 | -1.01076100 |
| H | 4.35288200  | -2.20181200 | -1.64875100 |
| H | 4.08266500  | -0.77641700 | -0.53708000 |
| H | 3.85200000  | -2.34886800 | 1.43725400  |
| H | 4.11570200  | -3.78558900 | 0.33819800  |

#####  
#####

***t*-1b-TS(N-C4)**

E (UB+HF - LYP) = -826,11327938 a.u.

1 imaginary frequency -171,38 cm<sup>\*\*</sup>-1

|   |             |             |             |
|---|-------------|-------------|-------------|
| C | -2.39899500 | 1.00397000  | 0.14549300  |
| C | -2.00860200 | -0.36097800 | 0.10789900  |
| C | -2.99117000 | -1.34513400 | -0.16176200 |
| C | -4.31282600 | -0.97482400 | -0.38883000 |
| C | -4.69631600 | 0.38223300  | -0.37714800 |
| C | -3.72323900 | 1.35658400  | -0.10771900 |
| N | -0.66661000 | -0.68832700 | 0.26222700  |
| C | -0.03062500 | -1.80813800 | 0.71695500  |
| O | -0.44496100 | -2.82225600 | 1.27816700  |
| C | 0.68489900  | -0.13580000 | -0.46215200 |
| C | 1.35674800  | -1.36324400 | 0.22633600  |
| C | 2.11328600  | -2.33074600 | -0.65065000 |
| C | 3.59589900  | -2.14773600 | -0.89235400 |
| C | 3.10181300  | -3.29737400 | -0.04182800 |
| C | 1.12392400  | 1.23206100  | -0.17922500 |
| C | 1.44797800  | 1.67033500  | 1.15187200  |
| C | 1.88329600  | 2.97275100  | 1.38475900  |
| C | 2.01222300  | 3.90478900  | 0.34144100  |
| C | 1.66269000  | 3.49363200  | -0.97758100 |
| C | 1.22866000  | 2.19869500  | -1.21652200 |
| H | 0.55130200  | -0.29730000 | -1.53785800 |
| H | 1.99526700  | -1.04157700 | 1.06183500  |
| H | -2.70112600 | -2.39181000 | -0.15982900 |
| H | -5.05767100 | -1.74795500 | -0.57405700 |
| H | -5.72956400 | 0.66724200  | -0.56289300 |
| H | -4.00388100 | 2.40879600  | -0.08209100 |
| H | -1.65521500 | 1.76099600  | 0.37473400  |
| H | 0.96545700  | 1.90165100  | -2.23273200 |
| H | 1.73547200  | 4.19801700  | -1.80535500 |
| H | 2.35363400  | 4.91858900  | 0.53765600  |
| H | 2.12243900  | 3.27423400  | 2.40522700  |
| H | 1.33256000  | 0.98546900  | 1.98942200  |
| H | 1.53896700  | -2.71551700 | -1.49393400 |
| H | 3.98824000  | -2.36788000 | -1.88309200 |
| H | 4.08420300  | -1.31166700 | -0.39701800 |
| H | 3.25485000  | -3.24648500 | 1.03386100  |
| H | 3.15317100  | -4.30492000 | -0.44870600 |

#####  
#####

***t*-1b-IN(N-C2)**

E (UB+HF - LYP) = -826,15456981 a.u.

|   |             |             |             |
|---|-------------|-------------|-------------|
| C | -2.39614800 | 0.48924800  | -0.98205400 |
| C | -2.07632600 | -0.41510700 | 0.08382500  |
| C | -3.20281400 | -0.98625700 | 0.76404300  |
| C | -4.50958400 | -0.69250500 | 0.40504500  |
| C | -4.79776100 | 0.19552200  | -0.65041100 |
| C | -3.71886500 | 0.77534200  | -1.32739300 |
| N | -0.83536100 | -0.76607500 | 0.49596200  |
| C | 0.31163800  | -0.30833700 | -0.25506400 |
| C | 1.36566400  | -1.37671900 | 0.13257500  |
| C | 2.49310600  | -1.62593300 | -0.84811500 |
| C | 3.80355900  | -0.87561800 | -0.73788800 |
| C | 3.74545400  | -2.35006700 | -0.40745400 |
| C | 0.78447500  | 1.11495500  | 0.04751900  |
| C | 0.58268200  | 1.67682600  | 1.31729400  |
| C | 1.04301200  | 2.96128300  | 1.61623700  |
| C | 1.71314900  | 3.71696700  | 0.64687900  |
| C | 1.91116200  | 3.17315600  | -0.62602400 |
| C | 1.44897100  | 1.88569500  | -0.91766100 |
| C | 0.45970900  | -2.61652900 | 0.29599500  |
| O | 0.55064400  | -3.46821700 | 1.14381100  |
| H | 0.16383700  | -0.37785500 | -1.35299100 |
| H | 1.78460300  | -1.13790800 | 1.12388800  |
| H | -2.99113700 | -1.67834900 | 1.57641700  |
| H | -5.32771600 | -1.16163500 | 0.95312500  |
| H | -5.82474200 | 0.42603100  | -0.92648100 |
| H | -3.90791900 | 1.47470900  | -2.14335700 |
| H | -1.59570500 | 0.98335700  | -1.52583800 |
| H | 1.60023100  | 1.47160400  | -1.91361500 |
| H | 2.41967200  | 3.75355900  | -1.39452700 |
| H | 2.06556700  | 4.72080200  | 0.87702200  |
| H | 0.86971700  | 3.37965100  | 2.60644400  |
| H | 0.03855700  | 1.08837700  | 2.05167000  |
| H | 2.15667600  | -1.84622200 | -1.86125900 |
| H | 4.30125800  | -0.56936400 | -1.65615100 |
| H | 3.91092000  | -0.16806800 | 0.08037700  |
| H | 3.80974400  | -2.64607800 | 0.63707400  |
| H | 4.20230400  | -3.05587800 | -1.09810700 |

#####  
#####



***t*-1b-IN(C3-C4)**

E (UB+HF - LYP) = -826,12739972 a.u.

|   |             |             |             |
|---|-------------|-------------|-------------|
| C | 1.79587200  | 1.64509800  | -0.80388100 |
| C | 0.51749700  | 1.54871000  | -0.21900500 |
| C | 0.08611200  | 2.59939500  | 0.61921100  |
| C | 0.91464500  | 3.69011400  | 0.86941100  |
| C | 2.19265900  | 3.77301100  | 0.29883400  |
| C | 2.62077100  | 2.73928200  | -0.54023000 |
| N | -0.31753400 | 0.44403500  | -0.45350800 |
| C | -1.79646900 | 0.65398100  | -0.49646900 |
| O | -2.21973400 | 1.71953000  | -1.01359300 |
| C | 0.14642500  | -0.79022600 | -0.87293800 |
| C | 1.22611500  | -1.53721500 | -0.32723800 |
| C | 1.96084300  | -1.17005300 | 0.84266200  |
| C | 2.98930200  | -1.97069700 | 1.32703800  |
| C | 3.34792600  | -3.16793800 | 0.68692800  |
| C | 2.63360700  | -3.55379300 | -0.46211100 |
| C | 1.60504100  | -2.76439300 | -0.95612700 |
| C | -2.50892700 | -0.40400400 | 0.05428800  |
| C | -3.98680300 | -0.42778200 | 0.03752600  |
| C | -4.76182800 | -1.73638800 | -0.03680000 |
| C | -4.79856100 | -0.91415900 | 1.23252900  |
| H | -0.46975600 | -1.26838500 | -1.62893900 |
| H | -1.97806200 | -1.20951500 | 0.55498400  |
| H | -0.90651200 | 2.55225700  | 1.05200300  |
| H | 0.55674700  | 4.48782300  | 1.51821300  |
| H | 2.83640200  | 4.62645300  | 0.50114200  |
| H | 3.60517700  | 2.78421600  | -1.00338800 |
| H | 2.13244100  | 0.85526900  | -1.46763800 |
| H | 1.06152300  | -3.07999100 | -1.84544300 |
| H | 2.88646600  | -4.48282000 | -0.97163300 |
| H | 4.15654000  | -3.78459200 | 1.07254600  |
| H | 3.52191900  | -1.65900100 | 2.22461200  |
| H | 1.69913300  | -0.25765000 | 1.36775000  |
| H | -4.42261000 | 0.40641300  | -0.50853200 |
| H | -5.65917400 | -1.78152900 | -0.65392200 |
| H | -4.18137300 | -2.65775700 | -0.03166800 |
| H | -4.24217400 | -1.28027600 | 2.09388300  |
| H | -5.72143100 | -0.39307000 | 1.48756200  |

#####  
#####

***t*-1b-IN(N-C4)**

E (UB+HF - LYP) = -826,15456981 a.u.

|   |             |             |             |
|---|-------------|-------------|-------------|
| C | 3.39045700  | -0.45068400 | -1.36403400 |
| C | 2.58677500  | -0.32134900 | -0.19766500 |
| C | 3.11727700  | -0.88043400 | 1.00042400  |
| C | 4.36160600  | -1.51586100 | 1.00675900  |
| C | 5.13355000  | -1.63172300 | -0.15546500 |
| C | 4.62754700  | -1.08862500 | -1.34598300 |
| N | 1.38292100  | 0.34129300  | -0.35681800 |
| C | 0.51622400  | 0.50322200  | 0.64560400  |
| O | 0.53800000  | 0.10478600  | 1.83640100  |
| C | -0.75470500 | 1.32929400  | 0.20787700  |
| C | -0.35656600 | 2.67610200  | -0.38110300 |
| C | -1.31333800 | 3.84719700  | -0.34376800 |
| C | -0.07061300 | 3.84314900  | 0.52753700  |
| C | -1.57967000 | 0.53438500  | -0.75043900 |
| C | -2.55638600 | -0.43250300 | -0.40676500 |
| C | -2.82414800 | -0.82536700 | 0.94192800  |
| C | -3.80962900 | -1.76106600 | 1.23301900  |
| C | -4.57264300 | -2.35318500 | 0.21332000  |
| C | -4.31581700 | -1.99769600 | -1.12200900 |
| C | -3.33163300 | -1.06762100 | -1.42662500 |
| H | -1.37109500 | 0.67468500  | -1.80999300 |
| H | -1.31557800 | 1.50418500  | 1.13425000  |
| H | 2.52916100  | -0.80317600 | 1.90608700  |
| H | 4.73425600  | -1.93129700 | 1.94365600  |
| H | 6.10096100  | -2.13075500 | -0.13658100 |
| H | 5.20534800  | -1.16412500 | -2.26739800 |
| H | 2.99803600  | -0.02864300 | -2.28679000 |
| H | -3.13789800 | -0.80353400 | -2.46484500 |
| H | -4.88885700 | -2.45739300 | -1.92582800 |
| H | -5.34083800 | -3.08537700 | 0.45187500  |
| H | -3.98083900 | -2.04686000 | 2.26949400  |
| H | -2.21522000 | -0.41419600 | 1.74138900  |
| H | 0.28169800  | 2.58679600  | -1.25725100 |
| H | -1.34714400 | 4.52473000  | -1.19571800 |
| H | -2.27644300 | 3.70005900  | 0.14227800  |
| H | -0.19716600 | 3.69173800  | 1.59766400  |
| H | 0.74745900  | 4.51242300  | 0.26856700  |

#####  
#####

**c-1c**

E (RB+HF - LYP) = -748,74228024 a.u.

|   |             |             |             |
|---|-------------|-------------|-------------|
| C | -0.00140000 | 1.17432500  | -0.51926900 |
| C | 1.04384500  | 0.11402900  | -1.05294800 |
| H | -0.32465300 | 1.86710200  | -1.30725800 |
| H | 1.17826300  | 0.22994200  | -2.13519300 |
| C | 2.38842900  | -0.02958400 | -0.38596900 |
| N | -0.95359600 | 0.04744200  | -0.36606100 |
| C | -0.06010000 | -0.92503000 | -0.77797500 |
| C | -2.32674900 | 0.02013000  | -0.07575500 |
| O | -0.16222500 | -2.13076400 | -0.88598100 |
| C | -2.99128300 | -1.20865000 | 0.09098900  |
| C | -4.35826000 | -1.21902100 | 0.36685400  |
| C | -5.07797700 | -0.02532700 | 0.48462200  |
| C | -4.41344900 | 1.19189100  | 0.31679600  |
| C | -3.04605800 | 1.22097100  | 0.03671600  |
| H | -2.43434700 | -2.13347400 | -0.00538100 |
| H | -4.86380800 | -2.17324800 | 0.49204000  |
| H | -6.14210000 | -0.04414900 | 0.70322000  |
| H | -4.95864700 | 2.12864100  | 0.40097600  |
| H | -2.54386700 | 2.17368400  | -0.09999400 |
| C | 2.57798500  | -0.85408800 | 0.73298300  |
| C | 3.82972000  | -0.94437500 | 1.34770700  |
| C | 4.91301100  | -0.21441000 | 0.85198300  |
| C | 4.73878800  | 0.60242600  | -0.26898400 |
| C | 3.48752900  | 0.68849400  | -0.88298800 |
| H | 1.75048000  | -1.44594100 | 1.11454500  |
| H | 3.95844100  | -1.59310200 | 2.21045700  |
| H | 5.88714400  | -0.28874100 | 1.32850200  |
| H | 5.57739000  | 1.16595300  | -0.67039600 |
| H | 3.36258000  | 1.31786700  | -1.76234200 |
| C | 0.33635500  | 1.92961100  | 0.75837900  |
| H | 1.16046200  | 2.62731400  | 0.57042500  |
| H | -0.52202800 | 2.50769300  | 1.11653400  |
| H | 0.64535000  | 1.24611800  | 1.55529300  |

#####  
#####

*c-1c<sup>-</sup>*

E (UB+HF - LYP) = -748,72821926 a.u.

|   |             |             |             |
|---|-------------|-------------|-------------|
| C | -0.01208100 | -1.10204400 | 0.56484100  |
| C | 1.02844900  | -0.01040400 | 1.02250000  |
| H | -0.32927700 | -1.75067800 | 1.39605300  |
| H | 1.15463400  | -0.08258600 | 2.13417200  |
| C | 2.39413200  | 0.05666600  | 0.39030900  |
| N | -0.97415800 | -0.00233300 | 0.33876300  |
| C | -0.03663300 | 0.99898400  | 0.62067900  |
| C | -2.33130100 | -0.01618600 | 0.07675200  |
| O | -0.15301900 | 2.22990700  | 0.66917700  |
| C | -3.05111400 | 1.20295400  | -0.09203300 |
| C | -4.41337700 | 1.17716000  | -0.35944100 |
| C | -5.12374500 | -0.03526600 | -0.47500800 |
| C | -4.40920900 | -1.23853100 | -0.32306900 |
| C | -3.04503600 | -1.23983800 | -0.05191600 |
| H | -2.51386200 | 2.14058100  | -0.00168100 |
| H | -4.93975300 | 2.12358400  | -0.47944600 |
| H | -6.19142600 | -0.04134100 | -0.68016400 |
| H | -4.92798300 | -2.19276700 | -0.40870100 |
| H | -2.52537300 | -2.18482300 | 0.07829400  |
| C | 2.77278400  | 1.11559700  | -0.44264100 |
| C | 4.05473700  | 1.16176900  | -1.01217300 |
| C | 4.96593400  | 0.11431300  | -0.78121000 |
| C | 4.60133800  | -0.94173500 | 0.05405600  |
| C | 3.33498600  | -0.96262800 | 0.65932400  |
| H | 2.06305600  | 1.91708600  | -0.62779500 |
| H | 4.33650100  | 2.00428600  | -1.64083400 |
| H | 5.95147400  | 0.13139400  | -1.24447700 |
| H | 5.30408200  | -1.75233600 | 0.24627700  |
| H | 3.06565200  | -1.77458300 | 1.33366100  |
| C | 0.32668900  | -1.93436900 | -0.66724700 |
| H | 1.13995500  | -2.63300800 | -0.43663500 |
| H | -0.53869700 | -2.51631200 | -1.00582300 |
| H | 0.65496100  | -1.29007000 | -1.48999600 |

#####  
#####

***c-1c-TS(N-C2)***

E (UB+HF - LYP) = -748,70764138 a.u.

1 imaginary frequency -44,77 cm<sup>\*\*</sup>-1

|   |             |             |             |
|---|-------------|-------------|-------------|
| C | -2.85552400 | -1.21607400 | -0.89620000 |
| C | -2.25475400 | -0.09764700 | -0.29215800 |
| C | -3.10087600 | 0.85554200  | 0.30258300  |
| C | -4.48807300 | 0.69206000  | 0.29953100  |
| C | -5.06853600 | -0.43364900 | -0.29466200 |
| C | -4.24219400 | -1.38860900 | -0.89598200 |
| C | -0.75171100 | 0.04421000  | -0.27709700 |
| C | -0.21488300 | 1.49875800  | -0.40585200 |
| O | 0.09933000  | 2.05395800  | -1.43367700 |
| C | 0.07023900  | -0.38015000 | 0.98169100  |
| C | -0.63089600 | -0.13459800 | 2.32301300  |
| N | 1.21343100  | 0.50411300  | 0.84464800  |
| C | 2.40176000  | 0.06229900  | 0.36822100  |
| C | 3.40375300  | 1.04327300  | 0.06073100  |
| C | 4.66428900  | 0.69530800  | -0.40020900 |
| C | 5.03117500  | -0.65101300 | -0.59122300 |
| C | 4.07275100  | -1.63075800 | -0.30722900 |
| C | 2.79599000  | -1.30000800 | 0.15060200  |
| H | 0.30135400  | -1.45478800 | 0.91660600  |
| H | -0.34054900 | -0.51925800 | -1.13021600 |
| H | 3.13191700  | 2.08691100  | 0.19974600  |
| H | 5.38271000  | 1.48592000  | -0.62035600 |
| H | 6.02224400  | -0.91964200 | -0.95097100 |
| H | 4.32136800  | -2.68422000 | -0.44655500 |
| H | 2.09702200  | -2.10608500 | 0.35856600  |
| H | -2.65734800 | 1.73681500  | 0.75779200  |
| H | -5.11940500 | 1.44889800  | 0.76189600  |
| H | -6.14918700 | -0.56190000 | -0.29427000 |
| H | -4.67754600 | -2.26592800 | -1.37139100 |
| H | -2.22053600 | -1.95953200 | -1.37517500 |
| H | -1.54829200 | -0.73030900 | 2.42709400  |
| H | 0.05534800  | -0.39747400 | 3.13761200  |
| H | -0.88282900 | 0.92647800  | 2.43194700  |

#####  
#####

***c-1c-TS(C2-C3)***

E (UB+HF - LYP) = -748,70707603 a.u.

1 imaginary frequency -110,19 cm<sup>\*\*</sup>-1

|   |             |             |             |
|---|-------------|-------------|-------------|
| C | 0.00722700  | -0.79749900 | -0.61148900 |
| C | -1.28822300 | -0.12850500 | -1.01794700 |
| H | 0.39430500  | -1.29764100 | -1.51507800 |
| H | -1.31591600 | 0.11831900  | -2.07786500 |
| C | -2.55907800 | -0.11613600 | -0.38582100 |
| N | 0.96280800  | 0.28984400  | -0.25041700 |
| C | 0.32410400  | 1.55001800  | -0.39984800 |
| C | 2.33918300  | 0.07229500  | -0.05884500 |
| O | 0.88987700  | 2.60766200  | -0.15569900 |
| C | 3.13145500  | 0.99849000  | 0.66092100  |
| C | 4.50083800  | 0.78940500  | 0.82114200  |
| C | 5.13179700  | -0.34174300 | 0.29019300  |
| C | 4.35765600  | -1.26491000 | -0.41928700 |
| C | 2.98798300  | -1.06271600 | -0.59739000 |
| H | 2.65761300  | 1.87936100  | 1.07271500  |
| H | 5.08178400  | 1.52233900  | 1.37886400  |
| H | 6.19894800  | -0.50110700 | 0.42899800  |
| H | 4.82073200  | -2.15477300 | -0.84331700 |
| H | 2.41890800  | -1.79313700 | -1.16248300 |
| C | -2.82177600 | -0.33224700 | 1.00935600  |
| C | -4.10948400 | -0.28912700 | 1.53458400  |
| C | -5.22717700 | -0.01115700 | 0.73179300  |
| C | -5.00071300 | 0.24357200  | -0.63482800 |
| C | -3.72309400 | 0.19417800  | -1.17102700 |
| H | -1.99449500 | -0.50158600 | 1.68887000  |
| H | -4.24408000 | -0.45996700 | 2.60324800  |
| H | -6.22934600 | 0.02368800  | 1.15322500  |
| H | -5.84111500 | 0.48054600  | -1.28807400 |
| H | -3.58315500 | 0.39249200  | -2.23336200 |
| C | -0.05404200 | -1.86706400 | 0.49402500  |
| H | -0.89203300 | -2.54932800 | 0.31335700  |
| H | 0.87098000  | -2.45484600 | 0.52450500  |
| H | -0.18173400 | -1.41568500 | 1.48171000  |

#####  
#####

***c-1c-TS(C3-C4)***

E (UB+HF - LYP) = -748,70889263 a.u.

1 imaginary frequency -383,01 cm<sup>\*\*</sup>-1

|   |             |             |             |
|---|-------------|-------------|-------------|
| C | -0.22930100 | 1.40437400  | -0.41238100 |
| C | 1.13888300  | 0.05088000  | -0.96341900 |
| H | -0.56522900 | 2.06921700  | -1.21797200 |
| H | 1.11524400  | 0.32167700  | -2.02474100 |
| C | 2.46204000  | -0.11493600 | -0.42882600 |
| N | -0.99990400 | 0.17197500  | -0.32920800 |
| C | -0.02440300 | -0.80470800 | -0.55085900 |
| C | -2.36841600 | 0.02564800  | -0.09718100 |
| O | -0.14199900 | -2.02258500 | -0.42850200 |
| C | -2.99004400 | -1.24647200 | -0.06738500 |
| C | -4.36756100 | -1.34726700 | 0.12398200  |
| C | -5.16612100 | -0.21110600 | 0.30367900  |
| C | -4.55092100 | 1.04759100  | 0.28776900  |
| C | -3.17634500 | 1.16886100  | 0.08905900  |
| H | -2.37631600 | -2.12978000 | -0.19239700 |
| H | -4.82318400 | -2.33633400 | 0.13682100  |
| H | -6.23965800 | -0.30340500 | 0.45281800  |
| H | -5.14643200 | 1.94798300  | 0.42986600  |
| H | -2.71342800 | 2.15044100  | 0.06505300  |
| C | 2.73809500  | -0.77089300 | 0.81833800  |
| C | 4.01607900  | -0.81472200 | 1.35209200  |
| C | 5.11201600  | -0.19947300 | 0.69950200  |
| C | 4.86446500  | 0.45499400  | -0.52587300 |
| C | 3.59028400  | 0.50126700  | -1.07319900 |
| H | 1.92403500  | -1.27097100 | 1.33897500  |
| H | 4.17774400  | -1.34175800 | 2.29304800  |
| H | 6.11083300  | -0.22961500 | 1.12906000  |
| H | 5.68841200  | 0.93260800  | -1.05807200 |
| H | 3.43052300  | 1.01812800  | -2.02021100 |
| C | 0.10340200  | 2.08215400  | 0.89252000  |
| H | 0.70279700  | 2.98173200  | 0.69764000  |
| H | -0.77387400 | 2.39044200  | 1.49144000  |
| H | 0.71094100  | 1.41933900  | 1.52423500  |

#####  
#####

***c-1c-TS(N-C4)***

E (UB+HF - LYP) = -748,70959719 a.u.

1 imaginary frequency -592,15 cm<sup>\*\*</sup>-1

|   |             |             |             |
|---|-------------|-------------|-------------|
| C | -0.18353200 | 0.55941700  | 1.35521700  |
| C | -1.03561700 | -0.59115600 | 0.80823100  |
| H | 0.23190500  | 0.37548500  | 2.35045200  |
| H | -1.14754600 | -1.36170500 | 1.58371900  |
| C | -2.40155800 | -0.29727300 | 0.24095700  |
| N | 0.99911800  | -0.06062600 | 0.10819800  |
| C | 0.09437200  | -1.03930800 | -0.16827200 |
| C | 2.36087800  | -0.02185400 | -0.08583400 |
| O | 0.16140800  | -2.02863800 | -0.89785900 |
| C | 3.22055100  | -1.10182900 | 0.29767000  |
| C | 4.60012000  | -0.97887600 | 0.21377300  |
| C | 5.20719900  | 0.21308700  | -0.24037900 |
| C | 4.36954500  | 1.28038800  | -0.63083600 |
| C | 2.98672900  | 1.17175100  | -0.56091900 |
| H | 2.77001600  | -2.03269700 | 0.63397000  |
| H | 5.22547400  | -1.82495000 | 0.50104900  |
| H | 6.28978600  | 0.30325000  | -0.29417900 |
| H | 4.81169100  | 2.20588800  | -1.00095900 |
| H | 2.35199400  | 1.99992200  | -0.87160900 |
| C | -2.57238500 | 0.21865900  | -1.06028900 |
| C | -3.84226400 | 0.52495300  | -1.55361800 |
| C | -4.98221600 | 0.32097200  | -0.76751300 |
| C | -4.83035700 | -0.20984200 | 0.52346700  |
| C | -3.55836400 | -0.50989900 | 1.01281700  |
| H | -1.69875100 | 0.36031000  | -1.69184500 |
| H | -3.94291900 | 0.91977300  | -2.56353400 |
| H | -5.97050900 | 0.56416800  | -1.15256700 |
| H | -5.70518100 | -0.39305200 | 1.14561700  |
| H | -3.45052800 | -0.91625200 | 2.01824800  |
| C | -0.49272600 | 2.00709300  | 1.07625300  |
| H | -1.34612600 | 2.38283200  | 1.66192400  |
| H | 0.37900200  | 2.62823000  | 1.32391200  |
| H | -0.72564500 | 2.16458800  | 0.01694900  |

#####  
#####



***c-1c-IN(N-C2)***

E (UB+HF - LYP) = -748,70592428 a.u.

|   |             |             |             |
|---|-------------|-------------|-------------|
| C | 0.19270300  | -0.21023600 | 0.15942300  |
| C | -0.99295200 | 0.62710400  | -0.40983000 |
| H | 0.24462500  | -1.12569300 | -0.47060400 |
| H | -0.78054500 | 0.77091200  | -1.47809200 |
| C | -2.38945100 | 0.05624600  | -0.26476000 |
| N | 1.32966900  | 0.65388500  | 0.00690700  |
| C | -0.90746200 | 2.03252000  | 0.22611100  |
| C | 2.56150900  | 0.11870100  | -0.03149500 |
| O | -1.07804600 | 3.08200900  | -0.31708300 |
| C | 3.68985900  | 1.00716300  | -0.15595700 |
| C | 4.99506500  | 0.54979900  | -0.22952700 |
| C | 5.29851000  | -0.82788500 | -0.18914500 |
| C | 4.22670000  | -1.72078200 | -0.06669200 |
| C | 2.90418400  | -1.28166100 | 0.01814500  |
| H | 3.47193000  | 2.07288000  | -0.19440400 |
| H | 5.80435900  | 1.27597400  | -0.32321200 |
| H | 6.32584800  | -1.18200800 | -0.24544400 |
| H | 4.42338300  | -2.79414900 | -0.02871600 |
| H | 2.11800400  | -2.02575900 | 0.11910600  |
| C | -3.14121000 | 0.17824500  | 0.91726900  |
| C | -4.42067600 | -0.37334200 | 1.01861900  |
| C | -4.98144600 | -1.06523800 | -0.05947100 |
| C | -4.24849900 | -1.19216600 | -1.24317800 |
| C | -2.97203800 | -0.63212500 | -1.34213300 |
| H | -2.71794100 | 0.71323800  | 1.76243400  |
| H | -4.98136200 | -0.26164500 | 1.94467000  |
| H | -5.97721300 | -1.49627400 | 0.02073500  |
| H | -4.67114100 | -1.72397000 | -2.09343100 |
| H | -2.41083400 | -0.73103500 | -2.26901900 |
| C | -0.03365700 | -0.66643900 | 1.61711900  |
| H | -0.21340800 | 0.20518600  | 2.25839400  |
| H | -0.87654600 | -1.36508500 | 1.71706400  |
| H | 0.87068800  | -1.16526500 | 1.98182900  |

#####  
#####

***c*-1c-IN(C2-C3)**

E (UB+HF - LYP) = -748,70022269 a.u.

|   |             |             |             |
|---|-------------|-------------|-------------|
| C | -3.78218300 | -0.40562500 | -0.94374200 |
| C | -2.48501500 | -0.32325000 | -0.33706100 |
| C | -2.46753500 | 0.26093900  | 0.97270100  |
| C | -3.63302500 | 0.66705000  | 1.61446400  |
| C | -4.89132300 | 0.54349300  | 1.00362000  |
| C | -4.93801100 | 0.01065100  | -0.29823000 |
| C | -1.33781100 | -0.74364900 | -1.06703600 |
| C | 0.00899900  | -1.17825300 | -0.52997000 |
| N | 0.85856000  | 0.04431800  | -0.46591800 |
| C | 2.21186600  | 0.04008900  | -0.08414200 |
| C | 2.81781800  | 1.21534100  | 0.41734300  |
| C | 4.16933300  | 1.22551300  | 0.75964800  |
| C | 4.95882500  | 0.07588800  | 0.63089800  |
| C | 4.36910000  | -1.09020100 | 0.13065100  |
| C | 3.02101200  | -1.10842400 | -0.23076900 |
| C | 0.25051600  | 1.05630800  | -1.26309300 |
| O | 0.72265500  | 2.17634400  | -1.38306300 |
| H | 0.43965100  | -1.86195700 | -1.28185900 |
| H | -1.53827500 | -1.07229500 | -2.08476500 |
| H | 2.21515300  | 2.10869600  | 0.52154400  |
| H | 4.60956200  | 2.14477300  | 1.14295000  |
| H | 6.00920800  | 0.08917700  | 0.91381600  |
| H | 4.96294600  | -1.99573500 | 0.01456900  |
| H | 2.59109000  | -2.02076500 | -0.63251000 |
| H | -1.51386900 | 0.43710000  | 1.46096400  |
| H | -3.55823500 | 1.10963200  | 2.60819100  |
| H | -5.79724300 | 0.86694000  | 1.51159400  |
| H | -5.89589800 | -0.08311800 | -0.81084000 |
| H | -3.85144800 | -0.81910100 | -1.94967000 |
| C | -0.00699900 | -1.94333800 | 0.80640700  |
| H | 0.99850000  | -2.25984800 | 1.10747700  |
| H | -0.42413100 | -1.34176500 | 1.61697200  |
| H | -0.63158300 | -2.83789400 | 0.69735600  |

#####  
#####

***c*-1c-IN(C3-C4)**

E (UB+HF - LYP) = -748,74170611 a.u.

|   |             |             |             |
|---|-------------|-------------|-------------|
| C | -3.68435000 | 0.55754900  | -0.11156900 |
| C | -2.36794800 | 0.04186800  | -0.02214500 |
| C | -2.20585200 | -1.36442800 | -0.09432000 |
| C | -3.30491200 | -2.19795400 | -0.26451300 |
| C | -4.60586600 | -1.67895500 | -0.37192600 |
| C | -4.77648200 | -0.29440900 | -0.28840100 |
| N | -1.26153000 | 0.87863500  | 0.09469200  |
| C | -1.35440500 | 2.23337800  | -0.14742000 |
| C | -0.31802100 | 3.20608600  | 0.31493700  |
| C | 0.05031400  | 0.28398500  | 0.54768100  |
| O | 0.06320500  | -0.21462200 | 1.69471900  |
| C | 1.05323700  | 0.37875400  | -0.41653600 |
| C | 2.42094500  | -0.05122400 | -0.26806200 |
| C | 3.33265300  | 0.10856600  | -1.34964400 |
| C | 4.66504200  | -0.28563900 | -1.26088000 |
| C | 5.16404400  | -0.86246100 | -0.08364700 |
| C | 4.28479400  | -1.03080600 | 0.99596600  |
| C | 2.94871900  | -0.64090400 | 0.91635100  |
| H | -2.11522400 | 2.55152600  | -0.85620900 |
| H | 0.78137000  | 0.82499800  | -1.37006400 |
| H | -1.21089300 | -1.78591300 | -0.00811200 |
| H | -3.14460600 | -3.27367400 | -0.31564900 |
| H | -5.45952900 | -2.33922000 | -0.50799500 |
| H | -5.77562400 | 0.13573200  | -0.34762100 |
| H | -3.84896900 | 1.62434700  | -0.00308500 |
| H | 2.27848500  | -0.78043700 | 1.75755100  |
| H | 4.64866500  | -1.47783100 | 1.92131900  |
| H | 6.20492500  | -1.17223100 | -0.01148200 |
| H | 5.32318100  | -0.14226400 | -2.11802800 |
| H | 2.96738400  | 0.55423600  | -2.27477300 |
| H | -0.76109600 | 4.21111200  | 0.37232600  |
| H | 0.06132600  | 2.94141300  | 1.30990900  |
| H | 0.56420800  | 3.27431300  | -0.34392000 |

#####  
#####

**c-1c-IN(N-C4)**

E (UB+HF - LYP) = -748,74702219 a.u.

|   |             |             |             |
|---|-------------|-------------|-------------|
| C | 1.31944400  | 2.32274800  | 0.61336700  |
| C | 1.29669900  | 1.31101700  | -0.49942900 |
| H | 0.93905500  | 3.30829900  | 0.34140100  |
| H | 1.64959800  | 1.81252300  | -1.40858000 |
| C | 2.22003300  | 0.12030100  | -0.26372000 |
| N | -0.90661100 | 0.49774200  | 0.17893900  |
| C | -0.18020500 | 0.87960200  | -0.87768200 |
| C | -2.20842900 | 0.04290400  | 0.05705500  |
| O | -0.47946700 | 0.96300600  | -2.09308000 |
| C | -2.95630400 | -0.14404100 | -1.14146400 |
| C | -4.26639100 | -0.62815200 | -1.10266200 |
| C | -4.89850000 | -0.94525500 | 0.10569700  |
| C | -4.17977100 | -0.76653700 | 1.29713700  |
| C | -2.87304400 | -0.28724000 | 1.27098600  |
| H | -2.48293500 | 0.10092700  | -2.08360000 |
| H | -4.80527600 | -0.75916400 | -2.04172200 |
| H | -5.92063600 | -1.31986400 | 0.12087400  |
| H | -4.64435600 | -1.00426800 | 2.25433900  |
| H | -2.31697800 | -0.14983700 | 2.19615600  |
| C | 1.84365500  | -0.98843800 | 0.51328900  |
| C | 2.72523300  | -2.05408000 | 0.71714700  |
| C | 4.00403200  | -2.04030600 | 0.14986300  |
| C | 4.39099900  | -0.94536600 | -0.62869400 |
| C | 3.50594200  | 0.11845200  | -0.82926900 |
| H | 0.84301800  | -1.00105500 | 0.93626100  |
| H | 2.40735900  | -2.90391800 | 1.31895000  |
| H | 4.68675000  | -2.87348600 | 0.30714800  |
| H | 5.37937300  | -0.92046900 | -1.08509900 |
| H | 3.81419600  | 0.96586400  | -1.43945500 |
| C | 1.35225300  | 1.98504500  | 2.06898200  |
| H | 1.52630700  | 2.88205000  | 2.67923400  |
| H | 0.39552000  | 1.53631500  | 2.38606500  |
| H | 2.13714800  | 1.25390200  | 2.30648700  |

#####  
#####

***t-1c***

E (RB+HF - LYP) = -748,74073207 a.u.

|   |             |             |             |
|---|-------------|-------------|-------------|
| C | -0.05124500 | 1.30618400  | -0.09801500 |
| C | -1.13459000 | 0.63763100  | 0.82034200  |
| H | -0.28166500 | 1.19455200  | -1.16480200 |
| H | -1.37884800 | 1.27286900  | 1.67926200  |
| C | -2.39714200 | 0.11094700  | 0.18746100  |
| N | 0.89647400  | 0.26248700  | 0.36885300  |
| C | -0.02220700 | -0.37455300 | 1.18372700  |
| C | 2.22776300  | -0.01742000 | 0.02295000  |
| O | 0.05905000  | -1.35458300 | 1.89466200  |
| C | 2.95988600  | -0.97963600 | 0.74202100  |
| C | 4.27879500  | -1.25168800 | 0.37963000  |
| C | 4.88569500  | -0.57896100 | -0.68613800 |
| C | 4.15272800  | 0.37284000  | -1.39923800 |
| C | 2.82968700  | 0.65395800  | -1.05348200 |
| H | 2.48772700  | -1.50481300 | 1.56434200  |
| H | 4.83664900  | -1.99780200 | 0.93988500  |
| H | 5.91501100  | -0.79565300 | -0.95825800 |
| H | 4.60761400  | 0.90030900  | -2.23391400 |
| H | 2.26643600  | 1.38575000  | -1.62461000 |
| C | -2.35178900 | -0.85084800 | -0.83491900 |
| C | -3.52567200 | -1.31876400 | -1.42643900 |
| C | -4.76840900 | -0.83550700 | -1.00344300 |
| C | -4.82657000 | 0.11615500  | 0.01677000  |
| C | -3.64840400 | 0.58313700  | 0.60679600  |
| H | -1.39338100 | -1.24794800 | -1.16286700 |
| H | -3.47091500 | -2.06715000 | -2.21297700 |
| H | -5.68265600 | -1.20311800 | -1.46215600 |
| H | -5.78705300 | 0.49444200  | 0.35763500  |
| H | -3.70144500 | 1.32058400  | 1.40507500  |
| C | 0.32451900  | 2.74411200  | 0.23664600  |
| H | -0.51219400 | 3.40887400  | -0.00962500 |
| H | 0.54936900  | 2.85057400  | 1.30430000  |
| H | 1.19935900  | 3.08225800  | -0.32858300 |

#####  
#####

*t-1c*<sup>-</sup>

E (UB+HF - LYP) = -748,72939746 a.u.

|   |             |             |             |
|---|-------------|-------------|-------------|
| C | 0.02763600  | 1.23516900  | -0.23763800 |
| C | 1.13327500  | 0.37538800  | -0.93421900 |
| H | 0.25939300  | 1.46010300  | 0.81354500  |
| H | 1.38069900  | 0.79066500  | -1.93021400 |
| C | 2.41683000  | 0.09239200  | -0.19311200 |
| N | -0.89833400 | 0.09487100  | -0.38170300 |
| C | 0.06298100  | -0.73174200 | -0.99226200 |
| C | -2.22136200 | -0.04195100 | -0.00970800 |
| O | -0.04400800 | -1.82229300 | -1.56891200 |
| C | -2.99815500 | -1.14900000 | -0.46587700 |
| C | -4.32042600 | -1.28402500 | -0.06725600 |
| C | -4.93783300 | -0.34757100 | 0.79118300  |
| C | -4.16088100 | 0.72827200  | 1.26576800  |
| C | -2.83199700 | 0.88201100  | 0.88707500  |
| H | -2.53114800 | -1.87626400 | -1.12166500 |
| H | -4.89175100 | -2.13687800 | -0.43296000 |
| H | -5.97701300 | -0.46140100 | 1.08974000  |
| H | -4.60094900 | 1.45641700  | 1.94680600  |
| H | -2.25309900 | 1.71311300  | 1.28263100  |
| C | 2.38948400  | -0.32861400 | 1.14989800  |
| C | 3.58932600  | -0.58765300 | 1.83804900  |
| C | 4.81671900  | -0.47201800 | 1.18043800  |
| C | 4.85354100  | -0.08699200 | -0.16625900 |
| C | 3.65213200  | 0.21721400  | -0.83555900 |
| H | 1.43298800  | -0.47260200 | 1.64783200  |
| H | 3.55816700  | -0.89081700 | 2.88349000  |
| H | 5.74266400  | -0.68983200 | 1.71204300  |
| H | 5.80312700  | -0.02626800 | -0.69588700 |
| H | 3.67440700  | 0.53845400  | -1.87679400 |
| C | -0.38795400 | 2.50417000  | -0.97592400 |
| H | 0.42904400  | 3.23700800  | -0.94005300 |
| H | -0.60432900 | 2.28206900  | -2.02785700 |
| H | -1.28169000 | 2.96019100  | -0.53503200 |

#####  
#####

***t*-1c-TS(N-C2)**

E (UB+HF - LYP) = -748,70360227 a.u.

1 imaginary frequency -77,04 cm<sup>\*\*</sup>-1

|   |             |             |             |
|---|-------------|-------------|-------------|
| C | -3.62007600 | 0.53750600  | -0.31965800 |
| C | -2.26561600 | 0.22263400  | -0.11864300 |
| C | -1.90855300 | -1.13862600 | -0.05738700 |
| C | -2.86910900 | -2.13758500 | -0.21638200 |
| C | -4.21416000 | -1.80852000 | -0.42897300 |
| C | -4.58580600 | -0.46172600 | -0.47620100 |
| C | -1.24217900 | 1.31050900  | 0.07535800  |
| C | -0.58627900 | 1.33127200  | 1.51000900  |
| O | -0.97868400 | 0.79956300  | 2.52049200  |
| C | 0.07680900  | 1.14984900  | -0.72171500 |
| C | 0.60596300  | 2.51904100  | -1.19908900 |
| N | 0.87871400  | 0.51711300  | 0.30275400  |
| C | 2.10926100  | 0.01468300  | 0.08277900  |
| C | 2.86020500  | -0.49318700 | 1.19574100  |
| C | 4.11923500  | -1.05254900 | 1.03776700  |
| C | 4.72464900  | -1.15869200 | -0.23004900 |
| C | 4.01064800  | -0.67878100 | -1.33484900 |
| C | 2.74667100  | -0.10296800 | -1.19834100 |
| H | -0.08006600 | 0.50465900  | -1.60814700 |
| H | -1.72492600 | 2.28330600  | -0.09384100 |
| H | 2.40248100  | -0.42303600 | 2.17982100  |
| H | 4.64750500  | -1.41892600 | 1.91880400  |
| H | 5.71296400  | -1.59824100 | -0.34633000 |
| H | 4.44797100  | -0.75107400 | -2.33192100 |
| H | 2.22883900  | 0.24761300  | -2.08730100 |
| H | -0.86840800 | -1.39334900 | 0.12736200  |
| H | -2.56776600 | -3.18252800 | -0.16713000 |
| H | -4.96092000 | -2.59116700 | -0.54888200 |
| H | -5.62723300 | -0.18675000 | -0.63644000 |
| H | -3.91985200 | 1.58410700  | -0.35691300 |
| H | -0.05281300 | 2.95314700  | -1.96669800 |
| H | 0.65732900  | 3.20855500  | -0.34739700 |
| H | 1.61340200  | 2.43023700  | -1.62039500 |

#####  
#####

***t*-1c-TS(C2-C3)**

E (UB+HF - LYP) = -748,69987971 a.u.

1 imaginary frequency 123,48 cm<sup>\*\*</sup>-1

|   |             |             |             |
|---|-------------|-------------|-------------|
| C | 0.06312600  | -0.48254100 | 0.86416000  |
| C | 1.30216200  | 0.38265400  | 0.89333700  |
| H | 0.22578800  | -1.37430200 | 0.24084800  |
| H | 1.37604500  | 1.01722200  | 1.77809700  |
| C | 2.54218500  | 0.04665200  | 0.27706800  |
| N | -0.95070100 | 0.40443000  | 0.24530200  |
| C | -0.22565300 | 1.52063900  | -0.26650500 |
| C | -2.27780200 | 0.05986700  | -0.01459200 |
| O | -0.75044000 | 2.56620400  | -0.62207900 |
| C | -3.26677500 | 1.05539900  | -0.21527700 |
| C | -4.58001900 | 0.69722800  | -0.51317700 |
| C | -4.96730300 | -0.64651800 | -0.60730500 |
| C | -3.99572900 | -1.63597500 | -0.41359600 |
| C | -2.67319400 | -1.29503300 | -0.13154900 |
| H | -2.97540200 | 2.09626800  | -0.14919000 |
| H | -5.31692800 | 1.48440500  | -0.66657400 |
| H | -5.99821700 | -0.91506100 | -0.82710700 |
| H | -4.26682000 | -2.68823200 | -0.48838900 |
| H | -1.93648000 | -2.08244800 | -0.00404600 |
| C | 2.66374600  | -0.84322500 | -0.83947100 |
| C | 3.89377300  | -1.11832400 | -1.42844000 |
| C | 5.07921400  | -0.52478600 | -0.96430800 |
| C | 4.98546500  | 0.37647000  | 0.11468500  |
| C | 3.76430400  | 0.65285500  | 0.71298700  |
| H | 1.76889800  | -1.30193900 | -1.25368800 |
| H | 3.93056600  | -1.80212500 | -2.27701800 |
| H | 6.03690100  | -0.74331700 | -1.43155300 |
| H | 5.88486600  | 0.86401000  | 0.49173700  |
| H | 3.72293700  | 1.35142700  | 1.54844800  |
| C | -0.37128900 | -0.93503800 | 2.26815100  |
| H | 0.40240900  | -1.58170500 | 2.69972400  |
| H | -0.49304300 | -0.06138800 | 2.92068600  |
| H | -1.32036300 | -1.48541000 | 2.26053100  |

#####  
#####



***t*-1c-TS(C3-C4)**

E (UB+HF - LYP) = -748,70794451 a.u.

1 imaginary frequency -337,53 cm<sup>\*\*</sup>-1

|   |             |             |             |
|---|-------------|-------------|-------------|
| C | 3.65024200  | 0.79125900  | -0.66320500 |
| C | 2.51908900  | -0.00283200 | -0.28212600 |
| C | 2.77907200  | -1.05161500 | 0.65941600  |
| C | 4.05433000  | -1.28825100 | 1.15080600  |
| C | 5.15587000  | -0.49618800 | 0.75596100  |
| C | 4.92233300  | 0.54716900  | -0.16317100 |
| C | 1.19761100  | 0.34729100  | -0.73055900 |
| C | 0.03842700  | -0.60022200 | -0.68129000 |
| O | -0.06368500 | -1.79036200 | -0.97711100 |
| N | -0.96307300 | 0.23683700  | -0.17793600 |
| C | -2.31895700 | -0.03027700 | 0.02256300  |
| C | -2.97366300 | -1.08917500 | -0.64955000 |
| C | -4.33182800 | -1.31862100 | -0.44299500 |
| C | -5.08264000 | -0.51426800 | 0.42904500  |
| C | -4.43616400 | 0.53015500  | 1.09901600  |
| C | -3.07703400 | 0.77640600  | 0.90174900  |
| C | -0.21929300 | 1.41660500  | 0.22436100  |
| C | -0.62132200 | 2.72845500  | -0.39090000 |
| H | 0.03237600  | 1.43968200  | 1.28835800  |
| H | 1.18585000  | 1.00778600  | -1.60614600 |
| H | -2.39567700 | -1.72974600 | -1.30465000 |
| H | -4.81185300 | -2.14316600 | -0.96785700 |
| H | -6.14368600 | -0.69948600 | 0.58102800  |
| H | -4.99397900 | 1.16434800  | 1.78648000  |
| H | -2.58458600 | 1.58390700  | 1.43484900  |
| H | 1.95685000  | -1.69135800 | 0.97203700  |
| H | 4.20629400  | -2.10818000 | 1.85340600  |
| H | 6.15152900  | -0.68245200 | 1.15245300  |
| H | 5.75244000  | 1.17381100  | -0.49161800 |
| H | 3.49792800  | 1.60889600  | -1.36853200 |
| H | 0.04923100  | 3.52278700  | -0.03480300 |
| H | -0.53062100 | 2.68701800  | -1.48959600 |
| H | -1.65754800 | 3.05584100  | -0.17767900 |

#####  
#####

***t*-1c-TS(N-C4)**

E (UB+HF - LYP) = -748,70706164 a.u.

1 imaginary frequency -557,58 cm<sup>\*\*</sup>-1

|   |             |             |             |
|---|-------------|-------------|-------------|
| C | -0.23338400 | 1.30685100  | -0.66742500 |
| C | -1.12470400 | 0.91165600  | 0.50228300  |
| H | -0.33733900 | 0.67231300  | -1.54878700 |
| H | -1.37120800 | 1.78401000  | 1.12357500  |
| C | -2.39262400 | 0.18894300  | 0.14863200  |
| N | 1.04954500  | 0.52161600  | 0.37450100  |
| C | 0.03515500  | 0.10605600  | 1.18045800  |
| C | 2.31593500  | 0.01774600  | 0.18274900  |
| O | 0.01267700  | -0.67158400 | 2.13241300  |
| C | 2.55154100  | -1.35911200 | -0.13562500 |
| C | 3.82335900  | -1.80682600 | -0.46669700 |
| C | 4.92505600  | -0.92563200 | -0.51081000 |
| C | 4.70617200  | 0.43327400  | -0.19377700 |
| C | 3.44165300  | 0.89628900  | 0.14519900  |
| H | 1.71763400  | -2.05562600 | -0.08885700 |
| H | 3.97099900  | -2.86366600 | -0.69143000 |
| H | 5.91634800  | -1.28418900 | -0.77874500 |
| H | 5.54282100  | 1.13237300  | -0.20731100 |
| H | 3.28633900  | 1.94477400  | 0.39430500  |
| C | -2.37281900 | -1.12441700 | -0.37759300 |
| C | -3.55147600 | -1.77010900 | -0.74562100 |
| C | -4.79545900 | -1.13985200 | -0.58849400 |
| C | -4.83404100 | 0.15201800  | -0.03731900 |
| C | -3.65257100 | 0.79736900  | 0.32603800  |
| H | -1.42155300 | -1.64027200 | -0.48363100 |
| H | -3.50374500 | -2.78102400 | -1.14774900 |
| H | -5.71410400 | -1.64971900 | -0.87057600 |
| H | -5.78922100 | 0.65372000  | 0.11082600  |
| H | -3.69764500 | 1.79822200  | 0.75395900  |
| C | 0.07102700  | 2.75040700  | -0.95526000 |
| H | -0.78725900 | 3.28744500  | -1.39567900 |
| H | 0.35395500  | 3.27555400  | -0.03148300 |
| H | 0.90882400  | 2.83947800  | -1.65964500 |

#####  
#####

***t*-1c-IN(N-C2)**

E (UB+HF - LYP) = -748,70976802 a.u.

|   |             |             |             |
|---|-------------|-------------|-------------|
| C | -3.43310300 | 0.07044300  | -0.78851600 |
| C | -2.15803000 | 0.08299400  | -0.20155700 |
| C | -1.69434700 | -1.09415400 | 0.41247800  |
| C | -2.47980300 | -2.24829600 | 0.41424200  |
| C | -3.74744500 | -2.25155500 | -0.18010300 |
| C | -4.22361600 | -1.08317800 | -0.78135400 |
| C | -1.32178300 | 1.34505200  | -0.22022900 |
| C | -1.21181600 | 2.02374500  | 1.16801200  |
| O | -1.82409100 | 1.79891700  | 2.16742100  |
| C | 0.13815200  | 1.17050000  | -0.72838800 |
| C | 0.66396900  | 2.51807900  | -1.27810600 |
| N | 0.89589100  | 0.66581300  | 0.38548500  |
| C | 2.08552300  | 0.07870600  | 0.15626900  |
| C | 2.84777700  | -0.38003000 | 1.28911700  |
| C | 4.06693300  | -1.02491800 | 1.15593700  |
| C | 4.63514500  | -1.27220000 | -0.11104500 |
| C | 3.92172700  | -0.83805500 | -1.23522000 |
| C | 2.69640600  | -0.17882700 | -1.12323300 |
| H | 0.08999500  | 0.46022100  | -1.58190600 |
| H | -1.83768800 | 2.09066900  | -0.84472300 |
| H | 2.42126900  | -0.19815200 | 2.27397900  |
| H | 4.59475600  | -1.34775400 | 2.05472800  |
| H | 5.59345500  | -1.77768200 | -0.21095800 |
| H | 4.33209700  | -1.01153300 | -2.23187600 |
| H | 2.19280100  | 0.13589900  | -2.03353700 |
| H | -0.70789500 | -1.07739200 | 0.86808600  |
| H | -2.09961400 | -3.15238400 | 0.88605500  |
| H | -4.35708900 | -3.15319200 | -0.17171400 |
| H | -5.20757000 | -1.06820100 | -1.24713700 |
| H | -3.81036300 | 0.97580000  | -1.26255600 |
| H | 0.58710800  | 3.29033800  | -0.50308500 |
| H | 1.71878100  | 2.42605200  | -1.55818000 |
| H | 0.09731500  | 2.84543300  | -2.16475900 |

#####  
#####

***t*-1c-IN(C2-C3)**

E (UB+HF - LYP) = -748,70927365 a.u.

|   |             |             |             |
|---|-------------|-------------|-------------|
| C | 2.52155300  | -0.24819100 | -1.21382700 |
| C | 2.04345200  | 0.06418000  | 0.08328100  |
| C | 2.81283300  | -0.38963200 | 1.18486100  |
| C | 3.98731700  | -1.11178100 | 0.98375400  |
| C | 4.44683700  | -1.42094100 | -0.30254700 |
| C | 3.69605800  | -0.98104200 | -1.39516700 |
| N | 0.85125800  | 0.78036200  | 0.25773100  |
| C | 0.29230300  | 1.29232400  | 1.45296600  |
| O | 0.76329300  | 1.08045000  | 2.56283900  |
| C | -0.07192000 | 1.12857800  | -0.86670500 |
| C | 0.40996200  | 2.38971800  | -1.60463900 |
| C | -1.44017600 | 1.31816000  | -0.28423800 |
| C | -2.40641200 | 0.28528500  | -0.17957900 |
| C | -3.77307700 | 0.58590500  | 0.13520000  |
| C | -4.74548200 | -0.39836600 | 0.23624500  |
| C | -4.43204500 | -1.75588200 | 0.03193700  |
| C | -3.09938300 | -2.08369300 | -0.26484700 |
| C | -2.11353000 | -1.10679600 | -0.36314700 |
| H | -0.06475300 | 0.27862500  | -1.56448800 |
| H | -1.79620900 | 2.34164300  | -0.19862100 |
| H | 2.46648900  | -0.16505000 | 2.18456000  |
| H | 4.55041700  | -1.44373000 | 1.85477300  |
| H | 5.36276700  | -1.98959700 | -0.44745600 |
| H | 4.02401100  | -1.20501800 | -2.40926200 |
| H | 1.97405800  | 0.07863700  | -2.08981600 |
| H | -1.08927400 | -1.41299800 | -0.56184900 |
| H | -2.82165300 | -3.12778700 | -0.41173800 |
| H | -5.19529300 | -2.52666600 | 0.11354600  |
| H | -5.76953300 | -0.11051700 | 0.47621200  |
| H | -4.04537100 | 1.62845200  | 0.29773900  |
| H | -0.20822200 | 2.56845300  | -2.49391800 |
| H | 0.31900800  | 3.25748600  | -0.93969300 |
| H | 1.45866700  | 2.31498600  | -1.91810500 |

#####  
#####

***t*-1c-IN(C3-C4)**

E (UB+HF - LYP) = -748,74091994 a.u.

|   |             |             |             |
|---|-------------|-------------|-------------|
| C | 2.31276300  | -1.18677400 | 0.75085700  |
| C | 2.30187000  | -0.03403300 | -0.06588700 |
| C | 3.52361500  | 0.39114900  | -0.62849600 |
| C | 4.71180000  | -0.29159500 | -0.36279400 |
| C | 4.71729500  | -1.42385600 | 0.45774200  |
| C | 3.50190200  | -1.86472700 | 1.00249200  |
| N | 1.11354900  | 0.67609800  | -0.29289100 |
| C | 1.13098800  | 2.03437700  | -0.58273000 |
| C | 1.87886200  | 3.01998100  | 0.27088800  |
| C | -0.16694600 | -0.08678400 | -0.39549200 |
| O | -0.10700300 | -1.21821800 | -0.92575600 |
| C | -1.27332300 | 0.59111300  | 0.13649200  |
| C | -2.64110000 | 0.14486800  | 0.09808800  |
| C | -3.07686800 | -1.06208100 | -0.52249600 |
| C | -4.42217600 | -1.42627700 | -0.53106800 |
| C | -5.40438700 | -0.62722700 | 0.07281700  |
| C | -4.99813200 | 0.56305600  | 0.69457100  |
| C | -3.65733400 | 0.93707100  | 0.70645200  |
| H | 0.23950600  | 2.37989900  | -1.09424900 |
| H | -1.08758700 | 1.52914200  | 0.65210900  |
| H | 1.37892300  | -1.54473800 | 1.16904800  |
| H | 3.48082700  | -2.75062500 | 1.63500400  |
| H | 5.64314900  | -1.95718200 | 0.66257600  |
| H | 5.63846400  | 0.05836300  | -0.81574700 |
| H | 3.51917200  | 1.24512400  | -1.29963200 |
| H | -2.32728800 | -1.69373600 | -0.98613700 |
| H | -4.71185000 | -2.35747400 | -1.01857200 |
| H | -6.45196200 | -0.92236000 | 0.06136900  |
| H | -5.73651900 | 1.20596500  | 1.17424500  |
| H | -3.36696700 | 1.86767400  | 1.19416600  |
| H | 1.84294900  | 4.01559800  | -0.18949400 |
| H | 1.43358500  | 3.10898200  | 1.28181700  |
| H | 2.93380500  | 2.75885600  | 0.42116400  |

#####  
#####

***t*-1c-IN(N-C4)**

E (UB+HF - LYP) = -748,74946510 a.u.

|   |             |             |             |
|---|-------------|-------------|-------------|
| C | 3.35665600  | -0.07931400 | 1.34748800  |
| C | 2.40786500  | -0.11772400 | 0.28896300  |
| C | 2.87202400  | -0.62660100 | -0.95749600 |
| C | 4.19271100  | -1.05783800 | -1.10986700 |
| C | 5.10855200  | -1.00917700 | -0.05237800 |
| C | 4.66965100  | -0.51190900 | 1.18403800  |
| N | 1.13784400  | 0.34671900  | 0.59485900  |
| C | 0.15723400  | 0.37617600  | -0.30891400 |
| O | 0.13240600  | 0.03119000  | -1.51719900 |
| C | -1.17342900 | 1.00190500  | 0.29154600  |
| C | -1.46814100 | 2.30675900  | -0.38585900 |
| C | -0.60457300 | 3.50306100  | -0.14016800 |
| C | -2.34284600 | 0.03627900  | 0.21852700  |
| C | -3.01526700 | -0.35050900 | 1.38848700  |
| C | -4.10499700 | -1.22659000 | 1.34761400  |
| C | -4.54671200 | -1.73835400 | 0.12426900  |
| C | -3.88167600 | -1.36658200 | -1.04991500 |
| C | -2.79430300 | -0.49054400 | -1.00484800 |
| H | -2.05046300 | 2.28052200  | -1.30614200 |
| H | -0.94577500 | 1.19450700  | 1.34622400  |
| H | 2.17466300  | -0.67148700 | -1.78425900 |
| H | 4.51103700  | -1.44156000 | -2.07986000 |
| H | 6.13432100  | -1.34920000 | -0.18507200 |
| H | 5.35951200  | -0.46256700 | 2.02685200  |
| H | 3.01453700  | 0.30588200  | 2.30571200  |
| H | -2.25315100 | -0.23195700 | -1.90954100 |
| H | -4.20713100 | -1.76890500 | -2.00801000 |
| H | -5.39349100 | -2.42139100 | 0.08601300  |
| H | -4.60536700 | -1.51031300 | 2.27216700  |
| H | -2.67425300 | 0.03931300  | 2.34595900  |
| H | 0.36473300  | 3.42410900  | -0.66611200 |
| H | -1.08668500 | 4.42832900  | -0.48537000 |
| H | -0.36313100 | 3.61393500  | 0.92609800  |

#####  
#####
